# Supplementary material for: NO2bond cleavage by MoL3complexes
Source: Royal Society of Chemistry journal article supplement (doi:10.1039/c3dt52554f), 2013-11-01
Supplement: c3dt52554f.pdf [file c3dt52554f.pdf]

# NO<sub>2</sub> Bond Cleavage by MoL<sub>3</sub> Complexes

Miranda F. Shaw, Narges Mahdizadeh Ghohe, Alireza Ariafard,\* Nigel J. Brookes,

Robert Stranger, and Brian F. Yates\*

*School of Chemistry, University of Tasmania, Hobart, Australia; School of Chemistry, Central*

*Tehran Branch, Islamic Azad University, Gharb, Tehran, Iran; School of Chemistry, Australian*

*National University, Canberra, Australia.*

## Supporting Information

### Contents

1. M06 optimized geometries and total energies for all species discussed.
2. Potential energy surfaces for selected structures using B3LYP.
3. B3LYP optimized geometries and total energies for species shown in Section 3.
4. Comparison between solvated and gas-phase optimised geometries for selected structures.

## 1. M06 optimized geometries and total energies for all species.

### NO<sub>2</sub>

E (M06/BS2) = -205.038955 au  
H (M06/BS2) = -205.026083 au  
G (M06/BS2) = -205.053287 au  
E (M06/BS2//M06/BS2, Solvent =DiethylEther) = -205.039870 au  
N 0.00000 0.00000 0.31851  
O 0.00000 1.09341 -0.13935  
O 0.00000 -1.09341 -0.13935

### 1\_Q

E (M06/BS2) = -236.026227 au  
H (M06/BS2) = -235.94421 au  
G (M06/BS2) = -235.986409 au  
E (M06/BS2//M06/BS2, Solvent =DiethylEther) = -236.037364 au  
N -1.35320 1.41890 0.00176  
N 1.90583 0.46239 0.00177  
N -0.55209 -1.88147 0.00154  
H -0.71790 -2.44479 0.82799  
H -0.71948 -2.44641 -0.82346  
H -1.75978 1.84592 -0.82306  
H -1.76144 1.84091 0.82833  
H 2.47869 0.60187 -0.82294  
H 2.47672 0.59937 0.82830  
Mo -0.00001 0.00010 -0.00120

### 2\_T

E (M06/BS2) = -441.153178 au  
H (M06/BS2) = -441.055022 au  
G (M06/BS2) = -441.104095 au  
E (M06/BS2//M06/BS2, Solvent =DiethylEther) = -441.166616 au  
Mo -0.50612 0.04568 0.05355  
O 2.47204 0.66527 -0.13055  
N 1.57212 -0.14031 -0.26074  
O 1.73815 -1.29305 -0.67101  
N -1.85717 -0.16490 -1.32959  
H -2.15390 0.58893 -1.93998  
H -2.11541 -1.05733 -1.73877  
N -0.15483 1.87869 0.49374  
H 0.81148 2.20266 0.52547  
H -0.77865 2.50758 0.98795  
N -0.58050 -1.27683 1.45255  
H 0.19410 -1.91494 1.61473  
H -1.23954 -1.29998 2.22236

### 3\_T

E (M06/BS2) = -441.162537 au  
H (M06/BS2) = -441.066715 au  
G (M06/BS2) = -441.115181 au  
E (M06/BS2//M06/BS2, Solvent =DiethylEther) = -441.1625368 au  
Mo -0.31798 0.00010 -0.02505  
N 1.79939 0.00076 -0.03220  
O 2.97151 0.00006 -0.20181  
O 1.30865 0.00088 1.21560  
N -0.81113 1.62491 -0.92984  
N -0.80830 -1.62564 -0.92969  
N -1.91649 -0.00095 1.14983  
H -0.34432 2.00886 -1.74334  
H -1.65823 2.13521 -0.70794  
H -0.34047 -2.00908 -1.74285  
H -1.65493 -2.13695 -0.70834  
H -1.83932 -0.00157 2.16050  
H -2.89297 -0.00186 0.87739

### 4\_T

E (M06/BS2) = -441.167434 au  
H (M06/BS2) = -441.070517 au  
G (M06/BS2) = -441.120359 au  
E (M06/BS2//M06/BS2, Solvent =DiethylEther) = -441.167434 au  
Mo 0.61966 -0.01151 0.00980  
O -1.29154 0.49989 -0.39640  
N -2.32390 -0.30468 -0.06043  
O -3.36766 0.09430 -0.44760  
N 0.05482 -1.40841 1.20373  
N 2.05100 -0.62403 -1.14454

|   |          |          |          |
|---|----------|----------|----------|
| N | 0.93697  | 1.79011  | 0.62319  |
| H | -0.94380 | -1.58511 | 1.30718  |
| H | 0.58149  | -1.77293 | 1.99036  |
| H | 2.17850  | -1.59560 | -1.40953 |
| H | 2.56071  | -0.02734 | -1.78841 |
| H | 0.17248  | 2.46054  | 0.62085  |
| H | 1.66596  | 2.07945  | 1.26612  |

### 5\_T

E (M06/BS2) = -441.178313 au  
H (M06/BS2) = -441.081727 au  
G (M06/BS2) = -441.130492 au  
E (M06/BS2//M06/BS2, Solvent = DiethylEther) = -441.178313 au

|    |          |          |          |
|----|----------|----------|----------|
| Mo | -0.28664 | -0.02033 | 0.03529  |
| N  | 2.25472  | 0.34026  | -0.37528 |
| O  | 1.33376  | 1.23965  | -0.27150 |
| O  | 1.73831  | -0.79969 | -0.24233 |
| N  | -1.67943 | 1.32995  | -0.14183 |
| N  | -1.14008 | -1.27449 | -1.16672 |
| N  | -0.19311 | -0.58136 | 1.87666  |
| H  | -1.47821 | 2.31960  | -0.03754 |
| H  | -2.67241 | 1.19095  | -0.29944 |
| H  | -0.75225 | -2.18137 | -1.40382 |
| H  | -1.92678 | -1.05354 | -1.76710 |
| H  | 0.58201  | -1.09747 | 2.27843  |
| H  | -0.98454 | -0.54416 | 2.50793  |

### TS1\_T

E (M06/BS2) = -441.150810 au  
H (M06/BS2) = -441.054054 au  
G (M06/BS2) = -441.101901 au  
E (M06/BS2//M06/BS2, Solvent = DiethylEther) = -441.161870 au

|    |          |          |          |
|----|----------|----------|----------|
| Mo | -0.43698 | -0.00814 | 0.03860  |
| O  | 2.58468  | 0.82911  | -0.19950 |
| N  | 1.62094  | 0.11244  | -0.20887 |
| O  | 1.65530  | -1.10702 | -0.52246 |
| N  | -1.63701 | -0.63254 | -1.36011 |
| H  | -2.13771 | -0.01720 | -1.99259 |
| H  | -1.64217 | -1.57942 | -1.72537 |
| N  | -0.93103 | 1.84320  | 0.27293  |
| H  | -0.23127 | 2.55437  | 0.46537  |
| H  | -1.85965 | 2.20606  | 0.46382  |
| N  | -0.34772 | -1.02257 | 1.67661  |
| H  | 0.43394  | -1.63480 | 1.89064  |
| H  | -1.06613 | -1.06717 | 2.38874  |

### TS2\_T

E (M06/BS2) = -441.149283 au  
H (M06/BS2) = -441.052996 au  
G (M06/BS2) = -441.102470 au  
E (M06/BS2//M06/BS2, Solvent = DiethylEther) = -441.159363 au

|    |         |          |          |
|----|---------|----------|----------|
| Mo | 0.44654 | -0.05273 | 0.00558  |
| N  | 1.93261 | -0.11161 | -0.24543 |
| O  | 3.11669 | -0.10229 | -0.31240 |
| O  | 1.32877 | 1.02377  | 0.04236  |
| N  | 1.37669 | -0.90244 | -1.46646 |
| N  | 0.37667 | -1.12405 | 1.60637  |
| N  | 1.51189 | 1.56052  | 0.21396  |
| H  | 1.12083 | -1.77988 | -1.90644 |
| H  | 2.07977 | -0.42613 | -2.02135 |
| H  | 0.46221 | -1.60284 | 1.91886  |
| H  | 1.15350 | -1.30214 | 2.23114  |
| H  | 1.07232 | 2.39518  | 0.59192  |
| H  | 2.51607 | 1.60187  | 0.35269  |

### TS3\_T

E (M06/BS2) = -441.144431 au  
H (M06/BS2) = -441.048118 au  
G (M06/BS2) = -441.097451 au  
E (M06/BS2//M06/BS2, Solvent = DiethylEther) = -441.156652 au

|    |          |          |          |
|----|----------|----------|----------|
| Mo | -0.55153 | -0.02802 | 0.01404  |
| N  | 2.42430  | 0.20272  | 0.14683  |
| O  | 1.26283  | 0.82557  | -0.17653 |
| O  | 2.90425  | -0.40527 | -0.74507 |
| N  | -1.32527 | 1.74315  | 0.00255  |
| N  | -1.62882 | -1.21498 | -1.06331 |
| N  | -0.01986 | -0.94866 | 1.62679  |
| H  | -0.70838 | 2.55000  | -0.04430 |

|   |          |          |          |
|---|----------|----------|----------|
| H | -2.20982 | 1.99771  | 0.42874  |
| H | -1.51505 | -2.22379 | -1.07738 |
| H | -2.15411 | -0.91950 | -1.88035 |
| H | 0.91898  | -0.83292 | 2.00160  |
| H | -0.65628 | -1.23255 | 2.36451  |

### TS6\_T

E (M06/BS2) = -441.148791 au  
H (M06/BS2) = -441.053526 au  
G (M06/BS2) = -441.101836 au  
E (M06/BS2//M06/BS2, Solvent =DiethylEther) = -441.159024 au

|    |          |          |          |
|----|----------|----------|----------|
| Mo | 0.32129  | -0.06302 | -0.02021 |
| O  | -0.97067 | -0.38561 | 1.30553  |
| N  | -1.72832 | -0.38925 | -0.06572 |
| O  | -2.76106 | 0.18888  | -0.08801 |
| N  | 1.73125  | 0.76372  | 1.02186  |
| N  | 1.18562  | -1.61264 | -0.78739 |
| N  | 0.15166  | 1.52250  | -1.12738 |
| H  | 1.84653  | 0.56283  | 2.01168  |
| H  | 2.14117  | 1.66934  | 0.81174  |
| H  | 0.70565  | -2.28400 | -1.37568 |
| H  | 2.18856  | -1.74718 | -0.81249 |
| H  | -0.64458 | 1.68332  | -1.73365 |
| H  | 0.74076  | 2.34603  | -1.08234 |

### TS7\_T

E (M06/BS2) = -441.140477 au  
H (M06/BS2) = -441.045687 au  
G (M06/BS2) = -441.096099 au  
E (M06/BS2//M06/BS2, Solvent =DiethylEther) = -441.151198 au

|    |          |          |          |
|----|----------|----------|----------|
| Mo | -0.58882 | 0.00207  | 0.00523  |
| N  | 2.46088  | -0.20655 | 0.10516  |
| O  | 1.11321  | 0.51620  | -0.43998 |
| O  | 3.38356  | 0.21539  | -0.45142 |
| N  | -1.66665 | 1.60936  | -0.03133 |
| N  | -1.41291 | -1.39178 | -1.07134 |
| N  | -0.04776 | -0.70234 | 1.72347  |
| H  | -1.24089 | 2.52939  | -0.07356 |
| H  | -2.63413 | 1.68260  | 0.26473  |
| H  | -1.34446 | -2.36932 | -0.80827 |
| H  | -1.60771 | -1.32006 | -2.06507 |
| H  | 0.89514  | -0.53746 | 2.06695  |
| H  | -0.64642 | -1.08560 | 2.44512  |

### TS8\_T

E (M06/BS2) = -441.148764 au  
H (M06/BS2) = -441.053598 au  
G (M06/BS2) = -441.100735 au  
E (M06/BS2//M06/BS2, Solvent =DiethylEther) = -441.158914 au

|    |          |          |          |
|----|----------|----------|----------|
| Mo | 0.22069  | 0.00448  | 0.05303  |
| N  | -2.15281 | 0.21040  | 0.39083  |
| O  | -1.00549 | -0.02821 | 1.42240  |
| O  | -1.77849 | -0.34888 | -0.68363 |
| N  | 2.00746  | 0.25919  | 0.72745  |
| N  | 0.69317  | -1.69174 | -0.74573 |
| N  | 0.26686  | 1.58390  | -1.05900 |
| H  | 2.44771  | 1.16022  | 0.88987  |
| H  | 2.66744  | -0.48972 | 0.91519  |
| H  | -0.00906 | -2.24915 | -1.21914 |
| H  | 1.63065  | -2.02674 | -0.93120 |
| H  | -0.53822 | 1.82990  | -1.62583 |
| H  | 1.10141  | 2.07169  | -1.36148 |

### 7\_D

E (M06/BS2) = -311.327942 au  
H (M06/BS2) = -311.240492 au  
G (M06/BS2) = -311.283251 au  
E (M06/BS2//M06/BS2, Solvent =DiethylEther) = -311.338207 au

|    |          |          |          |
|----|----------|----------|----------|
| Mo | 0.07798  | -0.03745 | 0.08730  |
| O  | 0.34693  | -0.49781 | 1.67569  |
| N  | -1.08641 | 1.52371  | -0.06610 |
| N  | 1.71203  | 0.22762  | -0.93696 |
| N  | -1.22620 | -1.16401 | -0.82563 |
| H  | -2.09588 | 1.44067  | -0.13652 |
| H  | -0.84753 | 2.41981  | 0.34316  |
| H  | 2.62872  | 0.01629  | -0.56162 |
| H  | 1.78608  | 0.56310  | -1.88991 |
| H  | -1.23485 | -2.17537 | -0.78160 |

H -2.08345 -0.81994 -1.24502

## NO

E (M06/BS2) = -129.859213 au  
H (M06/BS2) = -129.851360 au  
G (M06/BS2) = -129.874644 au  
E (M06/BS2//M06/BS2, Solvent =DiethylEther) = -129.859602 au  
N 0.00000 0.00000 -0.60926  
O 0.00000 0.00000 0.53310

## 2\_S

E (M06/BS2) = -441.168497 au  
H (M06/BS2) = -441.069414 au  
G (M06/BS2) = -441.115430 au  
E (M06/BS2//M06/BS2, Solvent =DiethylEther) = -441.181846 au  
Mo 0.42535 0.01832 -0.00667  
O -1.63400 -1.05257 -0.00807  
N -1.50058 0.20006 -0.20539  
O -2.40895 0.97433 -0.36236  
N 1.35758 1.65230 -0.40435  
H 1.74392 1.88067 -1.31634  
H 1.35155 2.48217 0.18186  
N 0.35724 -0.25084 1.88882  
H 1.16256 -0.39549 2.49079  
H -0.48820 -0.60740 2.33371  
N 0.98234 -1.51860 -1.01138  
H 1.95318 -1.75468 -1.19419  
H 0.37958 -2.32960 -1.12591

## 3\_S

E (M06/BS2) = -441.173767 au  
H (M06/BS2) = -441.075161 au  
G (M06/BS2) = -441.121525 au  
E (M06/BS2//M06/2 Solvent =DiethylEther) = -441.184226 au  
Mo 0.31539 -0.04715 0.00002  
N -1.62967 0.01300 0.00002  
O -2.79103 -0.25819 0.00025  
O -1.19220 1.30325 -0.00103  
N 0.77570 -1.00896 1.60401  
N 0.77550 -1.01182 -1.60229  
N 1.66355 1.33861 -0.00119  
H 0.17686 -1.68220 2.07005  
H 1.72207 -1.06281 1.96877  
H 0.17652 -1.68587 -2.06700  
H 1.72180 -1.06642 -1.96713  
H 1.86324 1.89991 -0.82691  
H 1.86313 1.90151 0.82346

## 4\_S

E (M06/BS2) = -441.154571 au  
H (M06/BS2) = -441.057697 au  
G (M06/BS2) = -441.105392 au  
E (M06/BS2//M06/BS2, Solvent =DiethylEther) = -441.164595 au  
Mo 0.49715 0.10497 0.00214  
O -1.35179 0.61122 0.16782  
N -2.39577 -0.28634 -0.13089  
O -3.44276 0.19137 0.06149  
N 0.78076 -1.25156 -1.31201  
N 1.83759 1.48791 -0.12958  
N 1.03558 -1.12978 1.35208  
H 0.70208 -1.15937 -2.32003  
H 1.15126 -2.17516 -1.08114  
H 1.58796 2.44869 -0.33866  
H 2.84425 1.36971 -0.14339  
H 1.15077 -0.94217 2.34326  
H 1.23262 -2.11274 1.15796

## 5\_S

E (M06/BS2) = -441.175913 au  
H (M06/BS2) = -441.077329 au  
G (M06/BS2) = -441.123065 au  
E (M06/BS2//M06/BS2, Solvent =DiethylEther) = -441.185208 au  
Mo 0.31438 -0.01352 -0.00007  
N -2.24048 0.45372 -0.00066  
O -1.25927 1.30304 -0.00108  
O -1.73083 -0.69136 0.00062  
N 1.65765 1.35353 -0.00130

|   |          |          |          |
|---|----------|----------|----------|
| N | 0.58296  | -1.05542 | 1.59189  |
| N | 0.58319  | -1.05936 | -1.58944 |
| H | 1.93296  | 1.87862  | -0.82994 |
| H | 1.93244  | 1.88054  | 0.82629  |
| H | -0.12043 | -1.66961 | 1.99173  |
| H | 1.50429  | -1.29150 | 1.95162  |
| H | -0.12023 | -1.67430 | -1.98807 |
| H | 1.50459  | -1.29654 | -1.94828 |

## 6\_S

E (M06/BS2) = -441.190667 au  
H (M06/BS2) = -441.092802 au  
G (M06/BS2) = -441.137413 au  
E (M06/BS2//M06/BS2, Solvent =DiethylEther) = -441.201068 au

|    |          |          |          |
|----|----------|----------|----------|
| Mo | -0.14472 | -0.00002 | 0.06013  |
| N  | 1.81441  | -0.00039 | 0.08063  |
| O  | 1.32729  | -1.09266 | -0.60728 |
| O  | 1.32787  | 1.09243  | -0.60654 |
| N  | -1.34645 | 1.37582  | -0.59079 |
| N  | -1.34740 | -1.37500 | -0.59099 |
| N  | -0.29671 | -0.00022 | 1.96547  |
| H  | -1.04712 | 2.33484  | -0.72805 |
| H  | -2.10973 | 1.15868  | -1.22351 |
| H  | -1.04869 | -2.33425 | -0.72813 |
| H  | -2.11002 | -1.15731 | -1.22433 |
| H  | 0.54045  | -0.00059 | 2.53691  |
| H  | -1.15455 | -0.00005 | 2.50207  |

## 8\_S

E (M06/BS2) = -441.208915 au  
H (M06/BS2) = -441.110704 au  
G (M06/BS2) = -441.156634 au  
E (M06/BS2//M06/BS2, Solvent =DiethylEther) = -441.216408 au

|    |          |          |          |
|----|----------|----------|----------|
| Mo | -0.31925 | -0.09460 | 0.11134  |
| O  | -0.30583 | -0.26511 | 1.78158  |
| N  | 1.79630  | -0.34410 | 0.13670  |
| O  | 2.68381  | 0.33807  | -0.16204 |
| N  | -0.24967 | -1.70932 | -1.01022 |
| N  | -2.05431 | 0.64850  | -0.37509 |
| N  | 0.32871  | 1.61877  | -0.59341 |
| H  | 0.24752  | -2.55575 | -0.76203 |
| H  | -0.58562 | -1.74946 | -1.96554 |
| H  | -2.86844 | 0.40063  | 0.17863  |
| H  | -2.23491 | 1.49193  | -0.90534 |
| H  | -0.23973 | 2.45226  | -0.66624 |
| H  | 1.31879  | 1.85326  | -0.61799 |

## 9\_S

E (M06/BS2) = -441.208820 au  
H (M06/BS2) = -441.110386 au  
G (M06/BS2) = -441.155466 au  
E (M06/BS2//M06/BS2, Solvent =DiethylEther) = -441.215550 au

|    |          |          |          |
|----|----------|----------|----------|
| Mo | 0.13073  | 0.03903  | 0.11218  |
| N  | -1.83467 | -0.70144 | -0.05924 |
| O  | -0.15783 | 0.27559  | 1.74828  |
| O  | -2.02763 | 0.43862  | -0.28949 |
| N  | 0.21912  | -1.76650 | -0.75440 |
| N  | 0.30732  | 1.65205  | -1.00432 |
| N  | 2.07918  | -0.13662 | 0.02579  |
| H  | 1.04423  | -2.10436 | -1.23537 |
| H  | -0.46107 | -2.50511 | -0.62984 |
| H  | -0.39328 | 2.37828  | -1.07485 |
| H  | 1.19200  | 1.94161  | -1.39948 |
| H  | 2.65563  | 0.62464  | 0.36837  |
| H  | 2.55866  | -1.02061 | 0.13433  |

## TS4\_S

E (M06/BS2) = -441.151650 au  
H (M06/BS2) = -441.054730 au  
G (M06/BS2) = -441.101638 au  
E (M06/BS2//M06/BS2, Solvent =DiethylEther) = -441.161163 au

|    |          |          |          |
|----|----------|----------|----------|
| Mo | -0.47919 | -0.10569 | 0.00062  |
| N  | 2.48151  | -0.18580 | -0.54377 |
| O  | 1.23153  | -0.83939 | -0.38488 |
| O  | 2.99829  | 0.03589  | 0.47625  |
| N  | -2.01009 | -1.23983 | 0.33265  |
| N  | -0.34236 | 1.30611  | 1.28798  |
| N  | -0.98010 | 1.16809  | -1.32733 |

|   |          |          |          |
|---|----------|----------|----------|
| H | -1.91032 | -2.18121 | 0.69829  |
| H | -2.97477 | -0.93558 | 0.40835  |
| H | -0.63053 | 2.26502  | 1.08926  |
| H | -0.08369 | 1.22445  | 2.26624  |
| H | -1.23584 | 0.97874  | -2.29195 |
| H | -0.92004 | 2.17576  | -1.17432 |

### TS5\_S

E (M06/BS2) = -441.155988 au  
H (M06/BS2) = -441.059830 au  
G (M06/BS2) = -441.103480 au  
E (M06/BS2//M06/BS2, Solvent =DiethylEther) = -441.163739 au

|    |          |          |          |
|----|----------|----------|----------|
| Mo | -0.23978 | 0.08795  | -0.01728 |
| N  | 2.22635  | -0.02176 | -0.05030 |
| O  | 1.61443  | -0.14823 | 1.05369  |
| O  | 1.53532  | -0.50536 | -1.01304 |
| N  | -1.34774 | -1.00626 | -1.12997 |
| N  | -1.20853 | -0.69880 | 1.42426  |
| N  | -0.67565 | 1.94959  | -0.21781 |
| H  | -1.10005 | -1.25168 | -2.08411 |
| H  | -2.14574 | -1.56395 | -0.82371 |
| H  | -0.89655 | -0.63874 | 2.38947  |
| H  | -1.93782 | -1.40673 | 1.33313  |
| H  | -0.92387 | 2.33356  | -1.12377 |
| H  | -1.08400 | 2.50280  | 0.52636  |

### TS9\_S

E (M06/BS2) = -441.172496 au  
H (M06/BS2) = -441.075075 au  
G (M06/BS2) = -441.119587 au  
E (M06/BS2//M06/BS2, Solvent =DiethylEther) = -441.182154 au

|    |          |          |          |
|----|----------|----------|----------|
| Mo | 0.29057  | 0.02724  | -0.01606 |
| O  | -1.04908 | -1.06674 | -0.84613 |
| N  | -1.65910 | -0.17356 | 0.15258  |
| O  | -2.82457 | 0.00821  | 0.10045  |
| N  | 1.10459  | -0.73432 | 1.55127  |
| N  | 1.89976  | -0.31904 | -1.03724 |
| N  | 0.22019  | 1.95579  | 0.04978  |
| H  | 0.66481  | -0.81031 | 2.46034  |
| H  | 2.07925  | -1.01804 | 1.59471  |
| H  | 2.63346  | -0.96826 | -0.75835 |
| H  | 2.07526  | -0.01597 | -1.99096 |
| H  | 1.02153  | 2.56939  | 0.14565  |
| H  | -0.64731 | 2.46488  | 0.17404  |

### TS10\_S

E (M06/BS2) = -441.146623 au  
H (M06/BS2) = -441.050473 au  
G (M06/BS2) = -441.098990 au  
E (M06/BS2//M06/BS2, Solvent =DiethylEther) = -441.154351 au

|    |          |          |          |
|----|----------|----------|----------|
| Mo | 0.48857  | -0.09360 | 0.02003  |
| N  | -2.61382 | -0.20295 | 0.56866  |
| O  | -1.02646 | -0.90714 | 0.52097  |
| O  | -2.95299 | 0.00613  | -0.48955 |
| N  | 1.99056  | -1.24362 | -0.39963 |
| N  | 0.16102  | 1.22791  | -1.35149 |
| N  | 1.03123  | 1.30232  | 1.23769  |
| H  | 2.92951  | -0.95420 | -0.64934 |
| H  | 1.88427  | -2.24480 | -0.51683 |
| H  | -0.17560 | 1.07008  | -2.29465 |
| H  | 0.43836  | 2.20357  | -1.24479 |
| H  | 0.91962  | 2.29339  | 1.02824  |
| H  | 1.33623  | 1.18583  | 2.19798  |

### TS11\_S

E (M06/BS2) = -441.181952 au  
H (M06/BS2) = -441.085226 au  
G (M06/BS2) = -441.128836 au  
E (M06/BS2//M06/BS2, Solvent =DiethylEther) = -441.192100 au

|    |          |          |          |
|----|----------|----------|----------|
| Mo | 0.17501  | -0.02695 | 0.02743  |
| N  | -1.75630 | -0.38366 | 0.33147  |
| O  | -0.79484 | 0.18299  | 1.56681  |
| O  | -1.85044 | 0.57704  | -0.44744 |
| N  | 0.68171  | 1.57632  | -0.93253 |
| N  | 1.96977  | -0.23735 | 0.71416  |
| N  | 0.11506  | -1.60759 | -1.08356 |
| H  | 0.02848  | 2.16142  | -1.43607 |

|   |          |          |          |
|---|----------|----------|----------|
| H | 1.60648  | 1.98832  | -0.89221 |
| H | 2.28017  | -0.96749 | 1.34608  |
| H | 2.69706  | 0.46309  | 0.61225  |
| H | -0.73651 | -2.13290 | -1.24056 |
| H | 0.86403  | -1.89451 | -1.70321 |

## 10\_T

E (M06/BS2) = -365.963201 au  
H (M06/BS2) = -365.870340 au  
G (M06/BS2) = -365.916010 au  
E (M06/BS2//M06/BS2, Solvent =DiethylEther) = -365.971138 au

|    |          |          |          |
|----|----------|----------|----------|
| N  | -1.13275 | -0.90749 | 1.39320  |
| N  | -1.13809 | -0.90129 | -1.39396 |
| N  | -0.45710 | 1.99650  | 0.00313  |
| H  | -1.37582 | 2.42596  | 0.00479  |
| H  | 0.26632  | 2.70370  | 0.00512  |
| H  | -1.00381 | -0.77409 | 2.39016  |
| H  | -1.82115 | -1.63825 | 1.23303  |
| H  | -1.00974 | -0.76692 | -2.39086 |
| H  | -1.82975 | -1.62905 | -1.23417 |
| Mo | -0.18315 | 0.07259  | 0.00005  |
| N  | 1.64766  | -0.07372 | -0.00063 |
| O  | 2.75355  | -0.52101 | -0.00284 |

## 10\_S

E (M06/BS2) = -366.014312 au  
H (M06/BS2) = -365.920171 au  
G (M06/BS2) = -365.964133 au  
E (M06/BS2//M06/BS2, Solvent =DiethylEther) = -366.025106 au

|    |          |          |          |
|----|----------|----------|----------|
| N  | -1.39810 | 0.00612  | 1.57799  |
| N  | -0.39650 | -1.68575 | -0.98802 |
| N  | -0.39633 | 1.67908  | -0.99858 |
| H  | -1.26267 | 1.98202  | -1.43373 |
| H  | 0.37625  | 2.24910  | -1.32010 |
| H  | -1.46598 | 0.82766  | 2.17241  |
| H  | -1.46843 | -0.81062 | 2.17865  |
| H  | 0.37584  | -2.25814 | -1.30589 |
| H  | -1.26296 | -1.99132 | -1.42108 |
| Mo | -0.26110 | -0.00036 | -0.04117 |
| N  | 1.45729  | 0.00050  | 0.20387  |
| O  | 2.60124  | 0.00209  | 0.53655  |

## 11\_Q

E (M06/BS2) = -677.259060 au  
H (M06/BS2) = -677.076444 au  
G (M06/BS2) = -677.146164 au  
E (M06/BS2//M06/BS2, Solvent =DiethylEther) = -677.273664 au

|    |          |          |          |
|----|----------|----------|----------|
| Mo | -2.34842 | -0.03615 | 0.01898  |
| H  | -3.77979 | -0.15464 | -2.19771 |
| H  | -3.79081 | 1.41084  | -1.66262 |
| H  | -3.16976 | -2.41898 | 0.79105  |
| H  | -1.53032 | -2.48098 | 0.50191  |
| H  | -3.20828 | 1.31453  | 2.11553  |
| H  | -1.57363 | 1.58080  | 1.93393  |
| N  | -3.59624 | 0.44910  | -1.40234 |
| N  | -2.37904 | -1.93744 | 0.37431  |
| N  | -2.41278 | 1.21613  | 1.49257  |
| O  | 0.38091  | -0.34899 | 0.91166  |
| O  | 0.31080  | 0.39956  | -1.10247 |
| Mo | 2.16640  | 0.03185  | -0.03988 |
| N  | -0.41336 | 0.02274  | -0.09348 |
| H  | 2.73096  | -0.90535 | -2.45150 |
| H  | 3.73730  | -1.64846 | -1.34606 |
| H  | 3.33551  | 2.36192  | 0.27372  |
| H  | 1.89644  | 2.60215  | -0.55339 |
| H  | 3.01039  | -0.85551 | 2.31471  |
| H  | 4.29488  | -1.03168 | 1.28044  |
| N  | 3.03563  | -0.93032 | -1.48496 |
| N  | 2.46848  | 1.94143  | -0.03890 |
| N  | 3.31993  | -0.76141 | 1.35341  |

## 11\_D

E (M06/BS2) = -677.269683 au  
H (M06/BS2) = -677.088359 au  
G (M06/BS2) = -677.152146 au  
E (M06/BS2//M06/BS2, Solvent =DiethylEther) = -677.2846987 au



|    |          |          |          |
|----|----------|----------|----------|
| N  | -2.93249 | -0.35309 | 1.65932  |
| N  | -3.15251 | -1.29930 | -0.89547 |
| N  | -2.62714 | 1.76256  | -0.79852 |
| H  | -2.10351 | 2.61997  | -0.67203 |
| H  | -3.55135 | 1.93203  | -1.17436 |
| H  | -3.66397 | -1.03917 | 1.80451  |
| H  | -2.50379 | -0.09035 | 2.53946  |
| H  | -3.87342 | -1.85924 | -0.44797 |
| H  | -2.77156 | -1.81834 | -1.68279 |
| O  | -0.44181 | 0.58364  | 0.90989  |
| O  | -0.46459 | -0.63761 | -0.85039 |
| N  | 0.45027  | -0.07328 | 0.06291  |
| Mo | -2.08104 | 0.07760  | -0.03563 |
| Mo | 2.29767  | -0.01666 | -0.00999 |
| N  | 2.58021  | -1.77479 | -0.77623 |
| N  | 2.61379  | 0.10732  | 1.89853  |
| N  | 3.03339  | 1.46848  | -1.05172 |
| H  | 3.01099  | 1.48069  | -2.06739 |
| H  | 3.02698  | 2.42637  | -0.71328 |
| H  | 3.53551  | 0.14812  | 2.32486  |
| H  | 1.91681  | -0.11560 | 2.60297  |
| H  | 1.87747  | -2.50808 | -0.78423 |
| H  | 3.49409  | -2.16945 | -0.98108 |

### TS12\_Q

E (M06/BS2) = -677.241927 au

H (M06/BS2) = -677.062518 au

G (M06/BS2) = -677.131077 au

E (M06/BS2//M06/BS2, Solvent =DiethylEther) = -677.257536 au

|    |          |          |          |
|----|----------|----------|----------|
| N  | -1.75559 | -0.78244 | -1.72611 |
| N  | -3.01234 | 1.58636  | 0.34108  |
| N  | -3.38767 | -1.16295 | 0.55987  |
| H  | -3.43701 | -2.15933 | 0.37187  |
| H  | -4.25059 | -0.85815 | 0.99894  |
| H  | -2.49695 | -1.32464 | -2.15426 |
| H  | -1.16400 | -0.34894 | -2.42746 |
| H  | -2.63318 | 2.51973  | 0.23152  |
| H  | -4.00117 | 1.60521  | 0.55990  |
| O  | -0.30425 | 1.29024  | -0.48269 |
| O  | -0.49985 | -0.29428 | 1.19618  |
| N  | 0.49346  | 0.72697  | 0.38228  |
| Mo | -1.91427 | 0.01509  | 0.05019  |
| Mo | 2.18471  | -0.09263 | 0.00660  |
| N  | 2.78396  | -0.70786 | 1.75332  |
| N  | 3.10509  | 1.43062  | -0.79449 |
| N  | 1.48574  | -1.42667 | -1.22562 |
| H  | 2.04327  | -2.03533 | -1.81413 |
| H  | 0.49722  | -1.65365 | -1.31091 |
| H  | 3.95995  | 1.39261  | -1.33665 |
| H  | 2.73968  | 2.37601  | -0.77781 |
| H  | 2.17102  | -0.70093 | 2.56156  |
| H  | 3.65773  | -1.17176 | 1.97166  |

### TS13\_D

E (M06/BS2) = -677.267963 au

H (M06/BS2) = -677.088000 au

G (M06/BS2) = -677.151587 au

E (M06/BS2//M06/BS2, Solvent =DiethylEther) = -677.282536 au

|    |          |          |          |
|----|----------|----------|----------|
| N  | -2.82621 | -0.85165 | 1.52623  |
| N  | -3.33540 | -0.85493 | -1.16773 |
| N  | -2.53355 | 1.93375  | -0.25042 |
| H  | -1.98656 | 2.68357  | 0.15306  |
| H  | -3.42536 | 2.25296  | -0.60460 |
| H  | -3.48365 | -1.62060 | 1.48618  |
| H  | -2.38777 | -0.78974 | 2.43750  |
| H  | -4.22882 | -1.25867 | -0.89742 |
| H  | -3.07191 | -1.20454 | -2.08544 |
| O  | -0.40196 | 0.46032  | 1.03365  |
| O  | -0.53290 | -0.51074 | -0.92844 |
| N  | 0.48659  | -0.04154 | 0.14958  |
| Mo | -2.06905 | 0.06844  | -0.01602 |
| Mo | 2.28942  | -0.02541 | -0.03076 |
| N  | 2.43803  | -1.55666 | -1.20306 |
| N  | 2.72606  | -0.33452 | 1.83284  |
| N  | 3.04668  | 1.62518  | -0.76922 |
| H  | 2.97666  | 1.86650  | -1.75346 |
| H  | 3.07897  | 2.48395  | -0.22708 |
| H  | 3.67645  | -0.42166 | 2.18195  |
| H  | 2.06943  | -0.68691 | 2.52190  |

|   |         |          |          |
|---|---------|----------|----------|
| H | 1.67618 | -2.20667 | -1.37108 |
| H | 3.31430 | -1.93959 | -1.54540 |

## 12\_Q

E (M06/BS2) = -677.260906 au  
H (M06/BS2) = -677.079355 au  
G (M06/BS2) = -677.146343 au  
E (M06/BS2//M06/BS2, Solvent = DiethylEther) = -677.275353 au

|    |          |          |          |
|----|----------|----------|----------|
| Mo | -1.88066 | -0.00855 | -0.00165 |
| H  | -4.18487 | -1.15411 | -0.59703 |
| H  | -4.24808 | 0.45864  | -1.02835 |
| H  | -1.87140 | -0.71744 | 2.53800  |
| H  | -0.80298 | -1.66213 | 1.63571  |
| H  | -2.22955 | 2.44450  | 0.97604  |
| H  | -0.99443 | 2.47264  | -0.15070 |
| N  | -3.71463 | -0.25699 | -0.54756 |
| N  | -1.57665 | -0.99962 | 1.60940  |
| N  | -1.74747 | 1.92520  | 0.25073  |
| Mo | 1.76708  | 0.03472  | -0.03938 |
| H  | 3.48449  | -1.74000 | 0.91050  |
| H  | 4.11912  | -0.25097 | 1.26567  |
| H  | 3.66027  | 0.36552  | -1.83693 |
| H  | 2.21313  | 0.91008  | -2.48872 |
| H  | 0.79996  | 2.16754  | 1.24805  |
| H  | 2.13165  | 1.56730  | 2.06246  |
| N  | 3.28214  | -0.74868 | 0.98285  |
| N  | 2.66234  | 0.46577  | -1.69563 |
| N  | 1.55078  | 1.48688  | 1.23567  |
| O  | -0.24587 | 0.21118  | -1.13660 |
| N  | -0.45971 | -1.16852 | -0.85723 |
| O  | 0.58531  | -1.57228 | -0.07080 |

## 12\_D

E (M06/BS2) = -677.260928 au  
H (M06/BS2) = -677.079194 au  
G (M06/BS2) = -677.141865 au  
E (M06/BS2//M06/BS2, Solvent = DiethylEther) = -677.275101 au

|    |          |          |          |
|----|----------|----------|----------|
| Mo | 1.92872  | -0.00703 | 0.00775  |
| H  | 4.26229  | 0.64875  | -1.07894 |
| H  | 4.28574  | -0.98610 | -0.69916 |
| H  | 2.02818  | 1.96813  | 1.78415  |
| H  | 0.90746  | 2.30193  | 0.56236  |
| H  | 2.23279  | -1.63016 | 2.11167  |
| H  | 0.94933  | -2.18030 | 1.18251  |
| N  | 3.77869  | -0.10955 | -0.60284 |
| N  | 1.69816  | 1.72439  | 0.85272  |
| N  | 1.74890  | -1.55356 | 1.21975  |
| Mo | -1.84273 | -0.02154 | -0.04664 |
| H  | -4.00945 | 1.51449  | -0.30536 |
| H  | -3.67766 | 1.31688  | 1.31967  |
| H  | -3.53198 | -1.79312 | -1.11538 |
| H  | -1.96146 | -2.11131 | -1.61523 |
| H  | -0.88383 | -1.01249 | 2.25586  |
| H  | -2.32984 | -0.23484 | 2.55880  |
| N  | -3.39752 | 1.05616  | 0.36975  |
| N  | -2.58226 | -1.43354 | -1.17527 |
| N  | -1.63200 | -0.45798 | 1.84503  |
| O  | 0.25446  | -0.74561 | -0.89122 |
| N  | 0.47438  | 0.58778  | -1.33783 |
| O  | -0.56720 | 1.33337  | -0.79964 |

## 13\_Q

E (M06/BS2) = -677.272346 au  
H (M06/BS2) = -677.090799 au  
G (M06/BS2) = -677.157769 au  
E (M06/BS2//M06/BS2, Solvent = DiethylEther) = -677.283939 au

|    |          |          |          |
|----|----------|----------|----------|
| Mo | -1.70484 | -0.06809 | -0.00413 |
| H  | -2.40948 | -1.30293 | -2.21036 |
| H  | -3.82269 | -0.81788 | -1.47372 |
| H  | -1.79627 | -2.26573 | 1.39379  |
| H  | -0.26457 | -1.57373 | 1.62668  |
| H  | -4.07691 | 1.10057  | 0.25384  |
| H  | -3.10601 | 1.53395  | 1.53614  |
| N  | -2.80932 | -0.81058 | -1.41752 |
| N  | -1.17508 | -1.49512 | 1.17402  |
| N  | -3.19354 | 0.93057  | 0.72442  |
| Mo | 1.70590  | 0.02123  | 0.00518  |

|   |          |          |          |
|---|----------|----------|----------|
| H | 2.67535  | -1.42980 | -2.00914 |
| H | 3.65557  | -1.71916 | -0.71321 |
| H | 3.79437  | 1.39617  | -0.76195 |
| H | 2.76239  | 2.42278  | 0.08110  |
| H | 1.72273  | -0.44090 | 2.60444  |
| H | 2.49249  | -1.70666 | 1.83409  |
| N | 2.75034  | -1.36041 | -0.99928 |
| N | 2.90324  | 1.48799  | -0.28781 |
| N | 1.87693  | -0.90855 | 1.71678  |
| O | -0.06406 | 1.17992  | 0.75116  |
| N | -0.47239 | 1.34670  | -0.56585 |
| O | 0.05983  | 0.11786  | -1.19465 |

### 13\_D

E (M06/BS2) = -677.276482 au  
H (M06/BS2) = -677.093656 au  
G (M06/BS2) = -677.156314 au  
E (M06/BS2//M06/BS2, Solvent =DiethylEther) = -677.287653 au

|    |          |          |          |
|----|----------|----------|----------|
| Mo | -1.67305 | 0.02367  | 0.00493  |
| H  | -2.61591 | 0.36301  | 2.43262  |
| H  | -3.93483 | 0.22640  | 1.42292  |
| H  | -1.67885 | 2.56604  | -0.52642 |
| H  | -0.13042 | 1.97199  | -0.90360 |
| H  | -4.03368 | -0.80375 | -0.90433 |
| H  | -2.94247 | -0.77507 | -2.16003 |
| N  | -2.92152 | 0.21440  | 1.47628  |
| N  | -1.05556 | 1.76625  | -0.52366 |
| N  | -3.09618 | -0.53581 | -1.18564 |
| Mo | 1.71547  | -0.08991 | 0.00979  |
| H  | 1.81795  | 1.20625  | 2.27937  |
| H  | 2.27834  | 2.25209  | 1.07152  |
| H  | 4.04742  | -1.15591 | 0.55425  |
| H  | 3.33750  | -1.97735 | -0.71484 |
| H  | 1.72906  | 1.18628  | -2.32362 |
| H  | 2.38067  | 2.20661  | -1.18051 |
| N  | 2.09304  | 1.27357  | 1.30190  |
| N  | 3.18655  | -1.32598 | 0.04936  |
| N  | 1.91199  | 1.31324  | -1.33273 |
| O  | 0.06001  | -0.90592 | -1.01381 |
| N  | -0.49947 | -1.53749 | 0.11890  |
| O  | 0.01898  | -0.67680 | 1.13927  |

### TS14\_Q

E (M06/BS2) = -677.242135 au  
H (M06/BS2) = -677.062777 au  
G (M06/BS2) = -677.129156 au  
E (M06/BS2//M06/BS2, Solvent =DiethylEther) = -677.2773041 au

|    |          |          |          |
|----|----------|----------|----------|
| Mo | -1.68826 | -0.05900 | -0.02697 |
| H  | -2.39721 | -1.29751 | -2.22115 |
| H  | -3.80894 | -0.82913 | -1.45972 |
| H  | -1.82810 | -2.25675 | 1.37147  |
| H  | -0.30023 | -1.56166 | 1.63349  |
| H  | -4.02588 | 1.18743  | 0.18528  |
| H  | -3.10245 | 1.54104  | 1.51963  |
| N  | -2.79526 | -0.79792 | -1.43213 |
| N  | -1.20690 | -1.48116 | 1.17385  |
| N  | -3.18578 | 0.94617  | 0.70100  |
| Mo | 1.68366  | 0.03919  | -0.02313 |
| H  | 2.62609  | -1.46688 | -1.99285 |
| H  | 3.65918  | -1.66167 | -0.71026 |
| H  | 3.78299  | 1.41328  | -0.80923 |
| H  | 2.74486  | 2.43981  | 0.02311  |
| H  | 1.70168  | -0.41388 | 2.58254  |
| H  | 2.48007  | -1.67428 | 1.81572  |
| N  | 2.73927  | -1.34155 | -0.99267 |
| N  | 2.90253  | 1.49659  | -0.31538 |
| N  | 1.85083  | -0.88721 | 1.69691  |
| O  | -0.08418 | 1.23555  | 0.81590  |
| N  | -0.47638 | 1.46224  | -0.41539 |
| O  | 0.06706  | -0.03151 | -1.15930 |

### TS15\_D

E (M06/BS2) = -677.256096 au  
H (M06/BS2) = -677.076685 au  
G (M06/BS2) = -677.142354 au  
E (M06/BS2//M06/BS2, Solvent =DiethylEther) = -677.282712 au

|    |          |          |          |
|----|----------|----------|----------|
| Mo | -1.72385 | 0.03214  | 0.05430  |
| H  | -2.42010 | 0.16307  | 2.59358  |
| H  | -3.84438 | 0.09463  | 1.71644  |
| H  | -1.75161 | 2.64450  | -0.17587 |
| H  | -0.24652 | 2.08657  | -0.75364 |
| H  | -4.13128 | -0.84534 | -0.70223 |
| H  | -3.17186 | -0.61693 | -2.05466 |
| N  | -2.82763 | 0.07833  | 1.66363  |
| N  | -1.15575 | 1.83877  | -0.34989 |
| N  | -3.24512 | -0.48253 | -1.04780 |
| Mo | 1.70091  | -0.00737 | 0.03037  |
| H  | 2.77664  | 1.61325  | 1.84001  |
| H  | 3.86378  | 0.39937  | 1.47668  |
| H  | 3.83345  | -1.55590 | 0.33596  |
| H  | 2.90133  | -2.14881 | -0.92433 |
| H  | 1.31783  | 1.15487  | -2.23772 |
| H  | 2.57001  | 1.97017  | -1.50461 |
| N  | 2.92489  | 0.76825  | 1.28831  |
| N  | 2.97615  | -1.42729 | -0.20912 |
| N  | 1.73080  | 1.41790  | -1.34101 |
| O  | -0.12535 | -0.73785 | -1.25110 |
| N  | -0.46653 | -1.49863 | -0.20138 |
| O  | 0.08894  | -0.62002 | 1.02796  |

## 14\_T

E (M06/BS2) = -365.962453 au  
H (M06/BS2) = -365.870275 au  
G (M06/BS2) = -365.916113 au  
E (M06/BS2//M06/BS2, Solvent =DiethylEther) = -365.971711 au

|    |          |          |          |
|----|----------|----------|----------|
| Mo | -0.12034 | 0.00015  | -0.01827 |
| H  | -2.28566 | 0.82449  | 1.29283  |
| H  | -2.28557 | -0.82596 | 1.29159  |
| H  | -0.86004 | 2.07424  | -1.51869 |
| H  | 0.78974  | 2.11843  | -1.23020 |
| H  | -0.86101 | -2.07314 | -1.51969 |
| H  | 0.78899  | -2.11713 | -1.23247 |
| N  | -1.84040 | -0.00042 | 0.89983  |
| N  | -0.08798 | 1.66064  | -1.00789 |
| N  | -0.08867 | -1.65962 | -1.00923 |
| O  | 1.90955  | -0.00084 | 0.24587  |
| N  | 1.23012  | -0.00071 | 1.36261  |

## 14\_S

E (M06/BS2) = -365.986889 au  
H (M06/BS2) = -365.894264 au  
G (M06/BS2) = -365.937697 au  
E (M06/BS2//M06/BS2, Solvent =DiethylEther) = -365.997199 au

|    |          |          |          |
|----|----------|----------|----------|
| Mo | 0.05926  | 0.01143  | -0.10040 |
| H  | 1.28787  | -1.69852 | -1.72079 |
| H  | 1.77228  | -1.95109 | -0.13522 |
| H  | 1.57599  | 2.13436  | 0.37888  |
| H  | 0.57211  | 2.46138  | -0.91385 |
| H  | 1.12528  | 0.11268  | 2.26999  |
| H  | -0.44718 | -0.38882 | 2.44035  |
| N  | 1.22991  | -1.37173 | -0.76435 |
| N  | 0.86176  | 1.76582  | -0.23798 |
| N  | 0.35129  | -0.36617 | 1.81687  |
| O  | -1.87082 | -0.19709 | 0.33670  |
| N  | -1.50138 | 0.03304  | -0.92829 |

## 1\_QF

E (M06/BS1) = -1635.614125 au

H (M06/BS1) = -1634.746108 au

G (M06/BS1) = -1634.866424 au

E (M06/BS2//M06/BS2, Solvent=DiethylEther) = -1636.10083272 au

|    |          |          |          |
|----|----------|----------|----------|
| Mo | -0.29329 | -1.21914 | -0.03489 |
| N  | -2.30707 | -1.0074  | -0.12772 |
| N  | 0.81739  | -1.13013 | -1.70570 |
| N  | 0.74968  | -1.21842 | 1.66318  |
| C  | 1.62875  | -0.09655 | 1.65372  |
| C  | 3.00555  | -0.24205 | 1.42946  |
| C  | 1.10810  | 1.20132  | 1.74483  |
| C  | 3.84042  | 0.86755  | 1.30854  |
| H  | 3.42234  | -1.24201 | 1.29920  |
| C  | 1.91848  | 2.32712  | 1.59868  |
| H  | 0.03135  | 1.32354  | 1.87975  |
| C  | 3.28611  | 2.14567  | 1.39787  |
| H  | 3.93069  | 3.01945  | 1.27636  |
| C  | -2.76707 | 0.28005  | 0.21525  |
| C  | -3.47820 | 1.12889  | -0.65556 |
| C  | -2.44892 | 0.78086  | 1.48591  |
| C  | -3.84464 | 2.41672  | -0.27675 |
| H  | -3.72555 | 0.79048  | -1.66166 |
| H  | -1.93152 | 0.11937  | 2.18531  |
| C  | -3.47249 | 2.89267  | 0.98571  |
| H  | -3.74132 | 3.91049  | 1.27737  |
| C  | 1.12688  | 0.22809  | -1.93383 |
| C  | 2.42728  | 0.76129  | -1.98161 |
| C  | 0.05016  | 1.13380  | -1.99616 |
| C  | 2.64480  | 2.13575  | -2.03029 |
| H  | 3.29147  | 0.10307  | -1.92511 |
| C  | 0.24855  | 2.51557  | -2.00928 |
| H  | -0.96869 | 0.73708  | -2.01979 |
| C  | 1.55205  | 3.00566  | -2.02689 |
| H  | 1.72239  | 4.08468  | -2.03712 |
| C  | -2.77045 | 2.08325  | 1.87501  |
| C  | -3.21582 | -1.99299 | -0.76906 |
| C  | 1.58450  | -2.24057 | -2.31582 |
| C  | 0.70125  | -2.10356 | 2.84443  |
| C  | -4.60835 | 3.30310  | -1.21627 |
| H  | -5.63028 | 3.48319  | -0.85389 |
| H  | -4.12960 | 4.28719  | -1.31699 |
| H  | -4.68470 | 2.86107  | -2.21746 |
| C  | -2.39322 | 2.56959  | 3.24365  |
| H  | -3.01783 | 2.10462  | 4.01957  |
| H  | -1.34981 | 2.32060  | 3.48764  |
| H  | -2.51168 | 3.65643  | 3.33249  |
| C  | 1.30451  | 3.69501  | 1.63337  |
| H  | 0.46142  | 3.75838  | 0.92913  |
| H  | 0.91104  | 3.94160  | 2.63006  |
| H  | 2.03107  | 4.47054  | 1.35961  |
| C  | 5.30247  | 0.67667  | 1.02738  |
| H  | 5.78010  | 0.02943  | 1.77537  |
| H  | 5.45832  | 0.19652  | 0.04911  |
| H  | 5.84061  | 1.63288  | 1.01638  |
| C  | -0.92894 | 3.44361  | -1.98569 |
| H  | -1.67937 | 3.16367  | -2.73868 |
| H  | -1.43932 | 3.40720  | -1.01012 |
| H  | -0.62790 | 4.48202  | -2.17322 |
| C  | 4.04459  | 2.67498  | -2.06118 |
| H  | 4.46274  | 2.66012  | -3.07813 |
| H  | 4.07956  | 3.71381  | -1.70817 |
| H  | 4.71501  | 2.08018  | -1.42556 |
| C  | 0.31390  | -1.28420 | 4.07613  |
| H  | 0.25339  | -1.92439 | 4.96755  |
| H  | 1.05517  | -0.49737 | 4.27171  |
| H  | -0.66411 | -0.80236 | 3.93070  |
| C  | 2.03530  | -2.80561 | 3.10282  |
| H  | 2.82743  | -2.09104 | 3.35849  |
| H  | 1.93567  | -3.50603 | 3.94419  |
| H  | 2.35152  | -3.37677 | 2.21786  |
| C  | -0.36198 | -3.16393 | 2.58692  |
| H  | -1.34803 | -2.70492 | 2.41638  |
| H  | -0.10609 | -3.76911 | 1.70165  |
| H  | -0.44456 | -3.84126 | 3.44830  |
| C  | -4.65458 | -1.82432 | -0.28266 |
| H  | -5.09159 | -0.86774 | -0.59180 |
| H  | -5.28054 | -2.62911 | -0.69187 |
| H  | -4.69873 | -1.87959 | 0.81436  |
| C  | -2.75119 | -3.38892 | -0.35199 |

|   |          |          |          |
|---|----------|----------|----------|
| H | -1.71357 | -3.58131 | -0.66522 |
| H | -2.80311 | -3.50366 | 0.73937  |
| H | -3.38503 | -4.15902 | -0.81403 |
| C | -3.15777 | -1.90194 | -2.29797 |
| H | -3.74680 | -2.70856 | -2.75870 |
| H | -3.55213 | -0.94897 | -2.67252 |
| H | -2.11771 | -1.99104 | -2.64699 |
| C | 0.73218  | -3.50369 | -2.19395 |
| H | 0.58245  | -3.78404 | -1.13707 |
| H | -0.25377 | -3.36193 | -2.65814 |
| H | 1.22981  | -4.34868 | -2.68992 |
| C | 2.90998  | -2.52585 | -1.59637 |
| H | 3.33452  | -3.47450 | -1.95574 |
| H | 3.66739  | -1.75113 | -1.75908 |
| H | 2.74025  | -2.61206 | -0.51245 |
| C | 1.82064  | -1.96048 | -3.79794 |
| H | 2.43811  | -1.06708 | -3.95313 |
| H | 2.33084  | -2.81047 | -4.27167 |
| H | 0.86015  | -1.80302 | -4.30933 |

## 2\_TF

E (M06/BS1) = -1840.671385 au

H (M06/BS1) = -1839.785716 au

G (M06/BS1) = -1839.909975 au

E (M06/BS2//M06/BS2, Solvent =DiethylEther) = -1841.218844 au

|   |          |          |          |
|---|----------|----------|----------|
| N | 2.48880  | 0.10196  | -0.36602 |
| N | 0.25069  | 0.00046  | 1.96756  |
| N | -0.19797 | -1.66094 | -1.18337 |
| C | -1.53967 | -1.18382 | -1.23658 |
| C | -2.61806 | -1.97336 | -0.81382 |
| C | -1.80265 | 0.10483  | -1.71387 |
| C | -3.93095 | -1.51850 | -0.92832 |
| H | -2.42197 | -2.94656 | -0.36593 |
| C | -3.10344 | 0.59874  | -1.79597 |
| H | -0.96378 | 0.73115  | -2.02038 |
| C | -4.15910 | -0.23178 | -1.41995 |
| H | -5.18404 | 0.14290  | -1.48612 |
| C | 2.02811  | 1.35956  | -0.86650 |
| C | 2.06397  | 2.51441  | -0.07294 |
| C | 1.46956  | 1.44209  | -2.14745 |
| C | 1.53907  | 3.72109  | -0.53015 |
| H | 2.46318  | 2.44743  | 0.94062  |
| H | 1.44526  | 0.54111  | -2.76350 |
| C | 0.95920  | 3.75998  | -1.80140 |
| H | 0.52103  | 4.69526  | -2.15785 |
| C | -0.99804 | 0.66515  | 1.76732  |
| C | -2.21199 | 0.01874  | 2.03876  |
| C | -1.02573 | 1.97460  | 1.28232  |
| C | -3.42624 | 0.67317  | 1.84738  |
| H | -2.19490 | -1.02168 | 2.36623  |
| C | -2.22981 | 2.64709  | 1.06944  |
| H | -0.08068 | 2.47095  | 1.07025  |
| C | -3.41902 | 1.98410  | 1.35994  |
| H | -4.37253 | 2.48941  | 1.18329  |
| C | 0.92429  | 2.63455  | -2.62598 |
| C | 3.95836  | -0.15171 | -0.39656 |
| C | 0.77258  | -0.03292 | 3.36492  |
| C | 0.15610  | -2.74442 | -2.14870 |
| C | 1.55605  | 4.93407  | 0.35277  |
| H | 2.56040  | 5.37580  | 0.41150  |
| H | 0.87441  | 5.71059  | -0.01574 |
| H | 1.25814  | 4.68212  | 1.38112  |
| C | 0.32027  | 2.69668  | -3.99769 |
| H | -0.23224 | 1.77712  | -4.23666 |
| H | -0.36988 | 3.54362  | -4.09541 |
| H | 1.09405  | 2.81458  | -4.76927 |
| C | -3.34846 | 1.98912  | -2.30300 |
| H | -2.49904 | 2.64805  | -2.07215 |
| H | -3.48533 | 2.00466  | -3.39429 |
| H | -4.25053 | 2.42796  | -1.85599 |
| C | -5.07494 | -2.40655 | -0.53384 |
| H | -5.37170 | -3.06488 | -1.36301 |
| H | -4.80768 | -3.05561 | 0.31028  |
| H | -5.96106 | -1.82492 | -0.24953 |
| C | -2.22067 | 4.05776  | 0.55585  |
| H | -1.98972 | 4.77615  | 1.35620  |
| H | -1.45402 | 4.19078  | -0.22238 |
| H | -3.19249 | 4.34113  | 0.13185  |
| C | -4.72468 | -0.01555 | 2.14307  |

|    |          |          |          |
|----|----------|----------|----------|
| H  | -5.15785 | 0.3334   | 3.09148  |
| H  | -5.46656 | 0.18248  | 1.35728  |
| H  | -4.59424 | -1.10248 | 2.21934  |
| C  | -0.23165 | -2.29285 | -3.55810 |
| H  | 0.07530  | -3.05107 | -4.29177 |
| H  | -1.31536 | -2.14798 | -3.65433 |
| H  | 0.26389  | -1.34508 | -3.81504 |
| C  | -0.52768 | -4.08004 | -1.84015 |
| H  | -1.60801 | -4.03841 | -2.01986 |
| H  | -0.11464 | -4.86052 | -2.49504 |
| H  | -0.35661 | -4.37987 | -0.79786 |
| C  | 1.66341  | -2.96412 | -2.11196 |
| H  | 2.19906  | -2.02248 | -2.29514 |
| H  | 1.99029  | -3.37633 | -1.14772 |
| H  | 1.95415  | -3.67979 | -2.89272 |
| C  | 4.45425  | -0.09795 | -1.84189 |
| H  | 4.27798  | 0.88837  | -2.29182 |
| H  | 5.53512  | -0.29224 | -1.87337 |
| H  | 3.95524  | -0.85461 | -2.46181 |
| C  | 4.24343  | -1.52550 | 0.18739  |
| H  | 3.91289  | -1.59923 | 1.23105  |
| H  | 3.74911  | -2.32322 | -0.37907 |
| H  | 5.32559  | -1.71165 | 0.16134  |
| C  | 4.71793  | 0.89380  | 0.42237  |
| H  | 5.78998  | 0.65398  | 0.41480  |
| H  | 4.60026  | 1.90371  | 0.01007  |
| H  | 4.38101  | 0.90175  | 1.46815  |
| C  | 2.21037  | -0.53668 | 3.35038  |
| H  | 2.28654  | -1.57590 | 3.00594  |
| H  | 2.83443  | 0.09541  | 2.70188  |
| H  | 2.62687  | -0.49513 | 4.36594  |
| C  | -0.07067 | -0.93897 | 4.26355  |
| H  | 0.38188  | -0.99790 | 5.26377  |
| H  | -1.08968 | -0.54949 | 4.38261  |
| H  | -0.13149 | -1.95239 | 3.84662  |
| C  | 0.77697  | 1.38796  | 3.93264  |
| H  | -0.23671 | 1.79977  | 4.01288  |
| H  | 1.22017  | 1.38343  | 4.93805  |
| H  | 1.37216  | 2.06044  | 3.29694  |
| Mo | 0.89497  | -0.84457 | 0.29106  |
| O  | 1.98903  | -3.41705 | 1.30988  |
| N  | 0.96810  | -2.73611 | 1.20898  |
| O  | -0.12710 | -3.13127 | 1.61889  |

### 3\_TF

E (M06/BS1) = -1840.643902 au

H (M06/BS1) = -1839.759540 au

G (M06/BS1) = -1839.882763 au

E (M06/BS2//M06/BS2, Solvent =DiethylEther) = -1841.194941 au

|   |          |          |          |
|---|----------|----------|----------|
| N | 2.49527  | -0.27970 | -0.28594 |
| N | 0.05508  | 0.16835  | 1.69162  |
| N | -0.38842 | -1.40388 | -1.24377 |
| C | -1.78360 | -1.21053 | -0.99599 |
| C | -2.49639 | -2.07862 | -0.16626 |
| C | -2.46020 | -0.15782 | -1.62455 |
| C | -3.87531 | -1.93426 | 0.00615  |
| H | -1.96026 | -2.88106 | 0.34344  |
| C | -3.83479 | -0.00163 | -1.47711 |
| H | -1.88595 | 0.55410  | -2.22181 |
| C | -4.53003 | -0.90884 | -0.66996 |
| H | -5.60916 | -0.79016 | -0.54341 |
| C | 2.25972  | 1.06326  | -0.72963 |
| C | 2.57962  | 2.17017  | 0.07097  |
| C | 1.67938  | 1.28549  | -1.97978 |
| C | 2.32173  | 3.46696  | -0.36195 |
| H | 2.99848  | 2.01417  | 1.06474  |
| H | 1.42583  | 0.42573  | -2.59925 |
| C | 1.74010  | 3.65526  | -1.62097 |
| H | 1.52466  | 4.67070  | -1.96169 |
| C | -1.08535 | 0.93431  | 1.28564  |
| C | -2.37061 | 0.61731  | 1.74792  |
| C | -0.91182 | 2.06827  | 0.49355  |
| C | -3.45059 | 1.44926  | 1.47227  |
| H | -2.52348 | -0.29342 | 2.32716  |
| C | -1.98961 | 2.89495  | 0.16729  |
| H | 0.08988  | 2.32689  | 0.15708  |
| C | -3.24385 | 2.58683  | 0.68277  |
| H | -4.09225 | 3.23697  | 0.45434  |
| C | 1.40397  | 2.57704  | -2.43540 |

|    |          |          |          |
|----|----------|----------|----------|
| C  | 3.93310  | -0.74199 | -0.25247 |
| C  | 0.46972  | 0.39418  | 3.13151  |
| C  | -0.12156 | -2.29002 | -2.43026 |
| C  | 2.57305  | 4.63612  | 0.54240  |
| H  | 3.36518  | 4.42526  | 1.27103  |
| H  | 2.85444  | 5.53408  | -0.02148 |
| H  | 1.66441  | 4.88405  | 1.11294  |
| C  | 0.73663  | 2.77949  | -3.76330 |
| H  | -0.30138 | 2.41438  | -3.74354 |
| H  | 0.70889  | 3.83940  | -4.04315 |
| H  | 1.25067  | 2.22975  | -4.56316 |
| C  | -4.56186 | 1.10999  | -2.17416 |
| H  | -3.87410 | 1.91008  | -2.47726 |
| H  | -5.07303 | 0.75213  | -3.07936 |
| H  | -5.32922 | 1.55461  | -1.52625 |
| C  | -4.61822 | -2.86377 | 0.92003  |
| H  | -4.50530 | -3.91203 | 0.61215  |
| H  | -4.23679 | -2.79407 | 1.94914  |
| H  | -5.69037 | -2.63307 | 0.94446  |
| C  | -1.78275 | 4.07890  | -0.73005 |
| H  | -0.89569 | 4.65882  | -0.43868 |
| H  | -1.62076 | 3.76122  | -1.77196 |
| H  | -2.65030 | 4.75037  | -0.72108 |
| C  | -4.81254 | 1.15849  | 2.02929  |
| H  | -5.06346 | 1.85371  | 2.84325  |
| H  | -5.59440 | 1.26846  | 1.26562  |
| H  | -4.87670 | 0.14118  | 2.43493  |
| C  | -0.55362 | -1.57458 | -3.71214 |
| H  | -0.31551 | -2.20583 | -4.57939 |
| H  | -1.63214 | -1.37700 | -3.72611 |
| H  | -0.02773 | -0.61658 | -3.83336 |
| C  | -0.87028 | -3.62068 | -2.32114 |
| H  | -1.95833 | -3.48849 | -2.35040 |
| H  | -0.58867 | -4.26207 | -3.16797 |
| H  | -0.60422 | -4.14120 | -1.39216 |
| C  | 1.36280  | -2.60384 | -2.52605 |
| H  | 1.97462  | -1.69390 | -2.56759 |
| H  | 1.69077  | -3.21532 | -1.67601 |
| H  | 1.55491  | -3.18132 | -3.44031 |
| C  | 4.70917  | -0.07605 | -1.38864 |
| H  | 4.80973  | 1.00813  | -1.25302 |
| H  | 5.71920  | -0.50549 | -1.42413 |
| H  | 4.22876  | -0.26062 | -2.35945 |
| C  | 4.00967  | -2.25075 | -0.45570 |
| H  | 3.36866  | -2.79666 | 0.24695  |
| H  | 3.74644  | -2.53058 | -1.48125 |
| H  | 5.04243  | -2.57895 | -0.27626 |
| C  | 4.59413  | -0.40718 | 1.08396  |
| H  | 5.65106  | -0.70639 | 1.05095  |
| H  | 4.56381  | 0.66732  | 1.30242  |
| H  | 4.11445  | -0.95696 | 1.90353  |
| C  | 1.95882  | 0.12850  | 3.32404  |
| H  | 2.22848  | -0.92011 | 3.17556  |
| H  | 2.55972  | 0.74936  | 2.64919  |
| H  | 2.23345  | 0.39563  | 4.35362  |
| C  | -0.32299 | -0.51553 | 4.06985  |
| H  | 0.06628  | -0.41989 | 5.09380  |
| H  | -1.38571 | -0.24697 | 4.09553  |
| H  | -0.22363 | -1.56325 | 3.75913  |
| C  | 0.23636  | 1.86069  | 3.51078  |
| H  | -0.82174 | 2.14547  | 3.47944  |
| H  | 0.59559  | 2.01966  | 4.53652  |
| H  | 0.79639  | 2.53451  | 2.84541  |
| Mo | 0.79452  | -1.06009 | 0.33396  |
| O  | 2.35296  | -3.14371 | 2.12008  |
| N  | 1.29932  | -2.53181 | 1.90810  |
| O  | 0.59237  | -2.97855 | 0.76906  |

#### 4\_TF

E (M06/BS1) = -1840.659018 au

H (M06/BS1) = -1839.774474 au

G (M06/BS1) = -1839.902551 au

E (M06/BS2//M06/BS2, Solvent = DiethylEther) = -1841.208071 au

|   |          |          |          |
|---|----------|----------|----------|
| N | -2.28427 | 0.62295  | -0.09871 |
| N | 0.04529  | -1.02943 | -1.83585 |
| N | -0.07872 | -1.00409 | 1.69524  |
| C | 1.32577  | -0.75595 | 1.63018  |
| C | 2.24911  | -1.80406 | 1.54215  |
| C | 1.79711  | 0.56148  | 1.63130  |



|   |          |          |          |
|---|----------|----------|----------|
| C | 3.62078  | -1.54882 | 1.51377  |
| H | 1.88677  | -2.83127 | 1.46963  |
| C | 3.16064  | 0.84154  | 1.58476  |
| H | 1.07388  | 1.37845  | 1.65781  |
| C | 4.06014  | -0.22589 | 1.55146  |
| H | 5.13287  | -0.02012 | 1.52322  |
| C | -1.76091 | 1.91123  | 0.23380  |
| C | -1.62482 | 2.93619  | -0.71700 |
| C | -1.35430 | 2.17163  | 1.54597  |
| C | -1.12263 | 4.18653  | -0.36476 |
| H | -1.90733 | 2.75231  | -1.75295 |
| H | -1.46209 | 1.38489  | 2.29212  |
| C | -0.69287 | 4.39769  | 0.94936  |
| H | -0.27488 | 5.36859  | 1.22499  |
| C | 1.18960  | -0.18221 | -1.85832 |
| C | 2.49019  | -0.68782 | -1.69981 |
| C | 1.02390  | 1.19426  | -2.03612 |
| C | 3.59572  | 0.15408  | -1.73423 |
| H | 2.62680  | -1.75705 | -1.53468 |
| C | 2.11743  | 2.06632  | -2.03197 |
| H | 0.01563  | 1.58066  | -2.19354 |
| C | 3.39265  | 1.53015  | -1.89332 |
| H | 4.25747  | 2.19822  | -1.90238 |
| C | -0.79457 | 3.39726  | 1.91315  |
| C | -3.72882 | 0.53986  | -0.46582 |
| C | -0.15986 | -1.93571 | -3.01153 |
| C | -0.60341 | -1.51367 | 2.99747  |
| C | -1.05629 | 5.29678  | -1.37166 |
| H | -1.87666 | 6.01312  | -1.22287 |
| H | -0.11966 | 5.86408  | -1.28991 |
| H | -1.13610 | 4.91644  | -2.39757 |
| C | -0.28898 | 3.60619  | 3.30971  |
| H | -0.92675 | 3.10465  | 4.04932  |
| H | 0.72460  | 3.19155  | 3.42836  |
| H | -0.23772 | 4.67064  | 3.56843  |
| C | 3.64460  | 2.26107  | 1.59237  |
| H | 2.88186  | 2.94159  | 1.18921  |
| H | 3.88323  | 2.60115  | 2.61070  |
| H | 4.55553  | 2.37800  | 0.98980  |
| C | 4.59414  | -2.68400 | 1.39095  |
| H | 4.45552  | -3.42795 | 2.18682  |
| H | 4.46162  | -3.21550 | 0.43660  |
| H | 5.63217  | -2.33188 | 1.43394  |
| C | 1.91104  | 3.54495  | -2.16562 |
| H | 1.19860  | 3.78356  | -2.96726 |
| H | 1.49604  | 3.96677  | -1.23757 |
| H | 2.85214  | 4.06630  | -2.37946 |
| C | 4.98875  | -0.39083 | -1.62737 |
| H | 5.45887  | -0.47378 | -2.61806 |
| H | 5.63054  | 0.26381  | -1.02205 |
| H | 5.00009  | -1.38961 | -1.17347 |
| C | -0.03258 | -0.67197 | 4.14088  |
| H | -0.45663 | -1.01539 | 5.09453  |
| H | 1.05957  | -0.75838 | 4.20678  |
| H | -0.28481 | 0.39163  | 4.01867  |
| C | -0.23828 | -2.98330 | 3.22582  |
| H | 0.84007  | -3.11335 | 3.37800  |
| H | -0.74612 | -3.35848 | 4.12554  |
| H | -0.54704 | -3.60475 | 2.37491  |
| C | -2.12243 | -1.37774 | 3.01223  |
| H | -2.43734 | -0.33548 | 2.86984  |
| H | -2.58691 | -1.99581 | 2.23411  |
| H | -2.51184 | -1.71735 | 3.98181  |
| C | -4.56217 | 1.25272  | 0.59763  |
| H | -4.31100 | 2.31925  | 0.66424  |
| H | -5.62966 | 1.17373  | 0.35046  |
| H | -4.40312 | 0.79823  | 1.58571  |
| C | -4.14018 | -0.92502 | -0.50891 |
| H | -3.61358 | -1.47140 | -1.30446 |
| H | -3.94473 | -1.42956 | 0.44603  |
| H | -5.21604 | -0.99644 | -0.71672 |
| C | -4.00527 | 1.15123  | -1.84191 |
| H | -5.02705 | 0.90261  | -2.16133 |
| H | -3.92201 | 2.24424  | -1.83621 |
| H | -3.30336 | 0.74815  | -2.58751 |
| C | -1.65752 | -2.14163 | -3.23402 |
| H | -2.11972 | -2.69089 | -2.40714 |
| H | -2.16222 | -1.17017 | -3.34659 |
| H | -1.82081 | -2.71978 | -4.15416 |
| C | 0.51944  | -3.28998 | -2.79919 |

|    |          |          |          |
|----|----------|----------|----------|
| H  | 0.29530  | -3.96255 | -3.64034 |
| H  | 1.61068  | -3.18364 | -2.74405 |
| H  | 0.16059  | -3.75958 | -1.87544 |
| C  | 0.39202  | -1.27794 | -4.27849 |
| H  | 1.47987  | -1.14231 | -4.24112 |
| H  | 0.16192  | -1.91327 | -5.14450 |
| H  | -0.07134 | -0.29451 | -4.44292 |
| Mo | -0.91957 | -0.80983 | -0.09515 |
| O  | -1.42613 | -2.79459 | -0.27610 |
| N  | -2.38375 | -3.39168 | 0.42149  |
| O  | -2.44966 | -4.57059 | 0.18688  |

## 5\_TF

E (M06/BS1) = -1840.661627 au

H (M06/BS1) = -1839.776386 au

G (M06/BS1) = -1839.899654 au

E (M06/BS2//M06/BS2, Solvent =DiethylEther) = -1841.218462 au

|    |          |          |          |
|----|----------|----------|----------|
| Mo | 0.82160  | -0.93258 | 0.28750  |
| N  | -0.29640 | -1.62374 | -1.23330 |
| N  | 0.21782  | -0.14210 | 2.00785  |
| N  | 2.49734  | -0.09380 | -0.32103 |
| C  | -1.58641 | -1.02148 | -1.29824 |
| C  | -2.74933 | -1.72076 | -0.94664 |
| H  | -2.66065 | -2.72603 | -0.53687 |
| C  | -4.00830 | -1.13591 | -1.07781 |
| C  | -4.09750 | 0.18889  | -1.50932 |
| H  | -5.08084 | 0.65930  | -1.59363 |
| C  | -2.95534 | 0.93159  | -1.80728 |
| C  | -1.71164 | 0.30866  | -1.71447 |
| H  | -0.81078 | 0.86710  | -1.97262 |
| C  | -0.01964 | -2.68361 | -2.24779 |
| C  | -0.84288 | -3.95842 | -2.04018 |
| H  | -1.90665 | -3.79968 | -2.25154 |
| H  | -0.74323 | -4.32937 | -1.01197 |
| H  | -0.48491 | -4.74062 | -2.72476 |
| C  | -0.31455 | -2.11870 | -3.63973 |
| H  | -1.37466 | -1.85933 | -3.75688 |
| H  | -0.06175 | -2.86278 | -4.40806 |
| H  | 0.28189  | -1.21378 | -3.82826 |
| C  | -0.93064 | 0.68089  | 1.79070  |
| C  | -2.22825 | 0.18005  | 1.97628  |
| H  | -2.35418 | -0.86854 | 2.24692  |
| C  | -3.34094 | 0.99260  | 1.78410  |
| C  | -3.14890 | 2.31865  | 1.37904  |
| H  | -4.02272 | 2.95329  | 1.20776  |
| C  | 0.66211  | -0.29756 | 3.42308  |
| C  | 0.80692  | 1.08466  | 4.06307  |
| H  | -0.15383 | 1.61190  | 4.12134  |
| H  | 1.50699  | 1.71011  | 3.49003  |
| H  | 1.19784  | 0.97970  | 5.08460  |
| C  | -0.32606 | -1.13008 | 4.24063  |
| H  | -1.29734 | -0.62722 | 4.33115  |
| H  | 0.06543  | -1.28397 | 5.25638  |
| H  | -0.48642 | -2.11086 | 3.77579  |
| C  | 2.19085  | 1.20901  | -0.81952 |
| C  | 2.33555  | 2.34926  | -0.01728 |
| H  | 2.71381  | 2.23698  | 1.00039  |
| C  | 2.09908  | 4.80819  | 0.41349  |
| H  | 1.47632  | 5.64577  | 0.07587  |
| H  | 3.14057  | 5.15869  | 0.42828  |
| H  | 1.82612  | 4.57778  | 1.45332  |
| C  | 1.37777  | 3.71176  | -1.74496 |
| H  | 1.03686  | 4.68784  | -2.09826 |
| C  | 1.23560  | 2.59998  | -2.57749 |
| C  | -1.87642 | 2.84105  | 1.17232  |
| C  | -0.77404 | 2.01038  | 1.38966  |
| H  | 0.23473  | 2.40121  | 1.25962  |
| C  | 1.65590  | 1.35584  | -2.10471 |
| H  | 1.53988  | 0.46415  | -2.72429 |
| C  | 3.93181  | -0.50073 | -0.29707 |
| C  | 4.76219  | 0.43024  | 0.58905  |
| H  | 4.79633  | 1.45288  | 0.19363  |
| H  | 5.79562  | 0.06076  | 0.63977  |
| H  | 4.36368  | 0.46487  | 1.61264  |
| C  | 4.04800  | -1.91529 | 0.25004  |
| H  | 3.66350  | -1.98543 | 1.27525  |
| H  | 5.10527  | -2.21202 | 0.26230  |
| H  | 3.50128  | -2.63766 | -0.36635 |
| C  | 1.45609  | -3.05707 | -2.18880 |

|   |          |          |          |
|---|----------|----------|----------|
| H | 1.70883  | -3.54194 | -1.23754 |
| H | 2.08917  | -2.16744 | -2.31319 |
| H | 1.69282  | -3.75948 | -2.99933 |
| C | -5.24127 | -1.92880 | -0.75372 |
| H | -5.13771 | -2.46030 | 0.20184  |
| H | -5.43763 | -2.69098 | -1.52105 |
| H | -6.13046 | -1.28882 | -0.69171 |
| C | 2.02673  | -0.97435 | 3.44727  |
| H | 2.75145  | -0.40414 | 2.84667  |
| H | 1.98126  | -1.99773 | 3.05773  |
| H | 2.40092  | -1.01912 | 4.47908  |
| C | -4.72917 | 0.46477  | 1.98469  |
| H | -4.71936 | -0.58651 | 2.29760  |
| H | -5.31221 | 0.53323  | 1.05484  |
| H | -5.27191 | 1.03910  | 2.74828  |
| C | -1.67572 | 4.26591  | 0.74575  |
| H | -0.90978 | 4.33898  | -0.04032 |
| H | -1.33591 | 4.89380  | 1.58239  |
| H | -2.60451 | 4.70490  | 0.35988  |
| C | 4.49393  | -0.45816 | -1.71869 |
| H | 4.43155  | 0.55184  | -2.14523 |
| H | 3.94949  | -1.14487 | -2.38078 |
| H | 5.55154  | -0.75583 | -1.71384 |
| C | 1.94229  | 3.60651  | -0.47109 |
| C | -3.05000 | 2.36173  | -2.25029 |
| H | -3.92065 | 2.86362  | -1.80737 |
| H | -3.14854 | 2.44343  | -3.34286 |
| H | -2.15029 | 2.92333  | -1.96132 |
| C | 0.64604  | 2.73295  | -3.95050 |
| H | 0.03670  | 1.85724  | -4.21361 |
| H | 1.43040  | 2.82005  | -4.71555 |
| H | 0.01284  | 3.62524  | -4.03061 |
| N | 0.28790  | -3.59126 | 1.46322  |
| O | 1.24388  | -2.82934 | 1.00992  |
| O | -0.81927 | -3.08615 | 1.45394  |

### TS3\_TF

E (M06/BS1) = -1840.651251 au

H (M06/BS1) = -1839.768632 au

G (M06/BS1) = -1839.892233 au

E (M06/BS2//M06/BS2, Solvent = DiethylEther) = -1841.199478 au

|   |          |          |          |
|---|----------|----------|----------|
| N | 2.54814  | -0.16370 | -0.26947 |
| N | 0.09310  | -0.30642 | 1.92417  |
| N | -0.29753 | -1.42509 | -1.44230 |
| C | -1.59245 | -0.82698 | -1.42137 |
| C | -2.68418 | -1.52002 | -0.88868 |
| C | -1.79887 | 0.46202  | -1.93373 |
| C | -3.96924 | -0.97553 | -0.91023 |
| H | -2.51874 | -2.49966 | -0.43882 |
| C | -3.06762 | 1.03416  | -1.94804 |
| H | -0.94179 | 1.01560  | -2.32381 |
| C | -4.14603 | 0.29443  | -1.45171 |
| H | -5.14622 | 0.73598  | -1.46869 |
| C | 2.34053  | 1.20311  | -0.61607 |
| C | 2.57330  | 2.23086  | 0.30694  |
| C | 1.79073  | 1.52942  | -1.86421 |
| C | 2.26021  | 3.55519  | 0.00529  |
| H | 2.94944  | 1.97693  | 1.29921  |
| H | 1.61060  | 0.72638  | -2.58099 |
| C | 1.70116  | 3.84434  | -1.24036 |
| H | 1.42648  | 4.87603  | -1.47276 |
| C | -0.99387 | 0.59471  | 1.71965  |
| C | -2.31308 | 0.21605  | 2.01897  |
| C | -0.76600 | 1.87506  | 1.20712  |
| C | -3.36772 | 1.10579  | 1.85464  |
| H | -2.50508 | -0.80227 | 2.36275  |
| C | -1.81619 | 2.77359  | 0.99503  |
| H | 0.25775  | 2.17629  | 0.98210  |
| C | -3.10324 | 2.38348  | 1.34440  |
| H | -3.93299 | 3.08107  | 1.20174  |
| C | 1.45756  | 2.84511  | -2.18525 |
| C | 3.94130  | -0.69068 | -0.27955 |
| C | 0.56178  | -0.47214 | 3.33345  |
| C | -0.08632 | -2.45831 | -2.49923 |
| C | 2.44677  | 4.62277  | 1.04226  |
| H | 3.50026  | 4.72633  | 1.33455  |
| H | 2.09831  | 5.59899  | 0.68415  |
| H | 1.88501  | 4.37937  | 1.95697  |
| C | 0.85333  | 3.18493  | -3.51546 |

|    |          |          |          |
|----|----------|----------|----------|
| H  | 0.41161  | 2.30233  | -3.99692 |
| H  | 0.06982  | 3.94842  | -3.41366 |
| H  | 1.60537  | 3.59031  | -4.20690 |
| C  | -3.28455 | 2.42595  | -2.46183 |
| H  | -2.37690 | 2.83158  | -2.92711 |
| H  | -4.09341 | 2.46511  | -3.20389 |
| H  | -3.56904 | 3.10315  | -1.64244 |
| C  | -5.11836 | -1.75222 | -0.33842 |
| H  | -5.29506 | -2.68183 | -0.89706 |
| H  | -4.91913 | -2.04280 | 0.70317  |
| H  | -6.04898 | -1.17094 | -0.35318 |
| C  | -1.54298 | 4.11712  | 0.38619  |
| H  | -0.71051 | 4.63163  | 0.88727  |
| H  | -1.25867 | 4.01322  | -0.67299 |
| H  | -2.42425 | 4.76955  | 0.43269  |
| C  | -4.77652 | 0.71099  | 2.18126  |
| H  | -4.81977 | -0.26359 | 2.68287  |
| H  | -5.25911 | 1.45027  | 2.83480  |
| H  | -5.38824 | 0.64208  | 1.26897  |
| C  | -0.34447 | -1.82037 | -3.86614 |
| H  | -0.14922 | -2.55126 | -4.66350 |
| H  | -1.38408 | -1.48234 | -3.96567 |
| H  | 0.31417  | -0.95395 | -4.02505 |
| C  | -0.98857 | -3.68344 | -2.33386 |
| H  | -2.04492 | -3.43998 | -2.50221 |
| H  | -0.70436 | -4.44751 | -3.07183 |
| H  | -0.88016 | -4.10833 | -1.32745 |
| C  | 1.36060  | -2.92647 | -2.44772 |
| H  | 2.05028  | -2.07465 | -2.52915 |
| H  | 1.56241  | -3.46605 | -1.51347 |
| H  | 1.56292  | -3.60844 | -3.28482 |
| C  | 4.51246  | -0.57474 | -1.69305 |
| H  | 4.52368  | 0.47003  | -2.03228 |
| H  | 5.54607  | -0.94648 | -1.71530 |
| H  | 3.92346  | -1.16263 | -2.40920 |
| C  | 3.92263  | -2.14988 | 0.15180  |
| H  | 3.53884  | -2.26329 | 1.17375  |
| H  | 3.29978  | -2.76168 | -0.51100 |
| H  | 4.94435  | -2.55161 | 0.12387  |
| C  | 4.84526  | 0.08849  | 0.67824  |
| H  | 5.84537  | -0.36623 | 0.68460  |
| H  | 4.96057  | 1.13607  | 0.37366  |
| H  | 4.45601  | 0.06372  | 1.70536  |
| C  | 1.89327  | -1.21363 | 3.33921  |
| H  | 1.79637  | -2.23197 | 2.94739  |
| H  | 2.63598  | -0.67377 | 2.73258  |
| H  | 2.27623  | -1.27616 | 4.36694  |
| C  | -0.44032 | -1.23509 | 4.20127  |
| H  | -0.02766 | -1.36937 | 5.21152  |
| H  | -1.38622 | -0.68825 | 4.30023  |
| H  | -0.64442 | -2.22681 | 3.77890  |
| C  | 0.79291  | 0.91299  | 3.94519  |
| H  | -0.13748 | 1.49109  | 4.01595  |
| H  | 1.20189  | 0.80519  | 4.95936  |
| H  | 1.51051  | 1.49236  | 3.34593  |
| Mo | 0.80178  | -0.95821 | 0.16785  |
| O  | 0.91440  | -2.91907 | 0.79130  |
| N  | 0.04366  | -3.43422 | 1.67346  |
| O  | -0.90226 | -3.96879 | 1.16522  |

## TS7\_TF

E (M06/BS1) = -1840.643565 au

H (M06/BS1) = -1839.762431 au

G (M06/BS1) = -1839.890816 au

E (M06/BS2//M06/BS2, Solvent = DiethylEther) = -1841.196500 au

|   |          |          |          |
|---|----------|----------|----------|
| N | 2.25858  | 0.93058  | -0.24586 |
| N | 0.24833  | -0.43098 | 1.91740  |
| N | 0.15395  | -1.23133 | -1.46674 |
| C | -1.26356 | -1.09892 | -1.47146 |
| C | -2.11489 | -2.20605 | -1.37324 |
| C | -1.83500 | 0.17343  | -1.58536 |
| C | -3.50050 | -2.05879 | -1.45820 |
| H | -1.69184 | -3.19720 | -1.21226 |
| C | -3.21558 | 0.35034  | -1.62510 |
| H | -1.17834 | 1.04236  | -1.63351 |
| C | -4.03682 | -0.77782 | -1.58423 |
| H | -5.12218 | -0.65381 | -1.62562 |
| C | 1.42195  | 2.04927  | -0.55060 |
| C | 1.04493  | 2.95631  | 0.44781  |

|    |          |          |          |
|----|----------|----------|----------|
| C  | 0.92333  | 2.22814  | -1.84486 |
| C  | 0.18087  | 4.01509  | 0.17370  |
| H  | 1.41963  | 2.80518  | 1.46239  |
| H  | 1.20351  | 1.50996  | -2.61815 |
| C  | -0.33065 | 4.14113  | -1.12091 |
| H  | -1.03437 | 4.94802  | -1.33855 |
| C  | -1.14235 | -0.11026 | 1.87310  |
| C  | -2.11454 | -1.12104 | 1.87534  |
| C  | -1.55621 | 1.22123  | 1.83943  |
| C  | -3.47031 | -0.80887 | 1.87013  |
| H  | -1.79640 | -2.16497 | 1.85890  |
| C  | -2.91063 | 1.56068  | 1.80552  |
| H  | -0.79993 | 2.00495  | 1.84270  |
| C  | -3.85235 | 0.53655  | 1.83047  |
| H  | -4.91628 | 0.78640  | 1.80145  |
| C  | 0.03393  | 3.26226  | -2.14179 |
| C  | 3.73078  | 1.18025  | -0.25285 |
| C  | 0.80934  | -0.78708 | 3.26104  |
| C  | 0.77694  | -1.97569 | -2.60707 |
| C  | -0.18583 | 4.99482  | 1.24890  |
| H  | 0.59594  | 5.75739  | 1.37375  |
| H  | -1.11984 | 5.52142  | 1.01580  |
| H  | -0.30762 | 4.50084  | 2.22260  |
| C  | -0.55190 | 3.37641  | -3.51773 |
| H  | 0.22808  | 3.47940  | -4.28384 |
| H  | -1.13222 | 2.47575  | -3.77108 |
| H  | -1.22332 | 4.23947  | -3.59986 |
| C  | -3.79944 | 1.72836  | -1.72765 |
| H  | -3.05874 | 2.49294  | -1.45269 |
| H  | -4.14095 | 1.95001  | -2.74935 |
| H  | -4.66916 | 1.84442  | -1.06623 |
| C  | -4.38670 | -3.26941 | -1.40625 |
| H  | -4.29622 | -3.87096 | -2.32161 |
| H  | -4.12068 | -3.92603 | -0.56651 |
| H  | -5.44301 | -2.99344 | -1.29680 |
| C  | -3.31856 | 3.00374  | 1.75057  |
| H  | -3.02209 | 3.54264  | 2.66192  |
| H  | -2.83420 | 3.51926  | 0.90725  |
| H  | -4.40406 | 3.11472  | 1.63693  |
| C  | -4.51095 | -1.88724 | 1.89558  |
| H  | -5.08031 | -1.87414 | 2.83571  |
| H  | -5.23670 | -1.75914 | 1.07986  |
| H  | -4.06033 | -2.88245 | 1.79298  |
| C  | 0.12082  | -1.53879 | -3.91631 |
| H  | 0.62233  | -2.03091 | -4.76100 |
| H  | -0.94249 | -1.80528 | -3.95351 |
| H  | 0.20779  | -0.45001 | -4.05047 |
| C  | 0.66921  | -3.49372 | -2.43671 |
| H  | -0.35007 | -3.85787 | -2.60908 |
| H  | 1.32173  | -3.99631 | -3.16501 |
| H  | 0.98934  | -3.78877 | -1.42807 |
| C  | 2.25847  | -1.61502 | -2.68401 |
| H  | 2.39836  | -0.52837 | -2.75227 |
| H  | 2.81410  | -1.99924 | -1.81720 |
| H  | 2.70209  | -2.07280 | -3.57859 |
| C  | 4.17214  | 1.64987  | -1.63963 |
| H  | 3.66549  | 2.57886  | -1.93189 |
| H  | 5.25358  | 1.84363  | -1.63979 |
| H  | 3.96431  | 0.88615  | -2.40064 |
| C  | 4.45924  | -0.10777 | 0.09309  |
| H  | 4.20234  | -0.46143 | 1.10017  |
| H  | 4.23224  | -0.91212 | -0.61662 |
| H  | 5.54309  | 0.06790  | 0.06699  |
| C  | 4.11118  | 2.24994  | 0.77226  |
| H  | 5.20204  | 2.38069  | 0.77836  |
| H  | 3.66131  | 3.22257  | 0.53639  |
| H  | 3.79884  | 1.95913  | 1.78454  |
| C  | 2.32728  | -0.64470 | 3.23084  |
| H  | 2.78731  | -1.37672 | 2.55433  |
| H  | 2.61431  | 0.36905  | 2.91438  |
| H  | 2.73660  | -0.81679 | 4.23547  |
| C  | 0.45182  | -2.22504 | 3.63571  |
| H  | 0.94359  | -2.50024 | 4.57982  |
| H  | -0.62949 | -2.34630 | 3.77733  |
| H  | 0.78840  | -2.92158 | 2.85608  |
| C  | 0.26853  | 0.17542  | 4.31766  |
| H  | -0.81816 | 0.08831  | 4.44076  |
| H  | 0.73600  | -0.04735 | 5.28654  |
| H  | 0.50315  | 1.21692  | 4.05448  |
| Mo | 1.14288  | -0.65198 | 0.16116  |

|   |         |          |         |
|---|---------|----------|---------|
| O | 1.91913 | -2.30087 | 0.51015 |
| N | 3.31004 | -3.03679 | 0.44358 |
| O | 3.14493 | -4.18833 | 0.69135 |

### TS8\_TF

E (M06/BS1) = -1840.654375 au

H (M06/BS1) = -1839.772789 au

G (M06/BS1) = -1839.898004 au

E (M06/BS2//M06/BS2, Solvent =DiethylEther) = -1841.205926 au

|    |          |          |          |
|----|----------|----------|----------|
| Mo | 0.91137  | -1.04961 | 0.21273  |
| N  | -0.18782 | -1.34997 | -1.40451 |
| N  | 0.08097  | -0.42055 | 1.88578  |
| N  | 2.53130  | -0.00423 | -0.20620 |
| C  | -1.51426 | -0.82307 | -1.40775 |
| C  | -2.61347 | -1.63710 | -1.12617 |
| H  | -2.44424 | -2.66541 | -0.80637 |
| C  | -3.91547 | -1.14010 | -1.21968 |
| C  | -4.10024 | 0.19789  | -1.56215 |
| H  | -5.11533 | 0.59969  | -1.62405 |
| C  | -3.01526 | 1.04942  | -1.79110 |
| C  | -1.72917 | 0.52317  | -1.72365 |
| H  | -0.86610 | 1.16340  | -1.91259 |
| C  | 0.16823  | -2.20789 | -2.58353 |
| C  | -0.53133 | -3.56768 | -2.52584 |
| H  | -1.61646 | -3.47515 | -2.65130 |
| H  | -0.32778 | -4.06763 | -1.56989 |
| H  | -0.15756 | -4.20752 | -3.33798 |
| C  | -0.22340 | -1.48909 | -3.87509 |
| H  | -1.30595 | -1.32304 | -3.94049 |
| H  | 0.07678  | -2.09885 | -4.73832 |
| H  | 0.27798  | -0.51395 | -3.95628 |
| C  | -1.07394 | 0.41440  | 1.74386  |
| C  | -2.36485 | -0.11126 | 1.88484  |
| H  | -2.48881 | -1.18274 | 2.04939  |
| C  | -3.48215 | 0.71573  | 1.79870  |
| C  | -3.29844 | 2.07931  | 1.54532  |
| H  | -4.17460 | 2.72930  | 1.47249  |
| C  | 0.53392  | -0.65170 | 3.29855  |
| C  | 0.77024  | 0.69179  | 3.98970  |
| H  | -0.14542 | 1.29224  | 4.05468  |
| H  | 1.53095  | 1.27869  | 3.45332  |
| H  | 1.13340  | 0.51932  | 5.01228  |
| C  | -0.51124 | -1.45565 | 4.07086  |
| H  | -1.44923 | -0.89893 | 4.18677  |
| H  | -0.13110 | -1.68444 | 5.07631  |
| H  | -0.72505 | -2.39993 | 3.55290  |
| C  | 2.17884  | 1.32943  | -0.58958 |
| C  | 2.23998  | 2.38767  | 0.32558  |
| H  | 2.57653  | 2.18823  | 1.34383  |
| C  | 1.87789  | 4.77796  | 0.98829  |
| H  | 1.29069  | 5.64765  | 0.66876  |
| H  | 2.90930  | 5.11806  | 1.15528  |
| H  | 1.48898  | 4.44564  | 1.96173  |
| C  | 1.32328  | 3.88705  | -1.30938 |
| H  | 0.97125  | 4.88402  | -1.5839  |
| C  | 1.26367  | 2.85937  | -2.2514  |
| C  | -2.02945 | 2.62275  | 1.37217  |
| C  | -0.92375 | 1.77683  | 1.48081  |
| H  | 0.08103  | 2.18281  | 1.37146  |
| C  | 1.70218  | 1.58760  | -1.87942 |
| H  | 1.65041  | 0.76689  | -2.5968  |
| C  | 3.99254  | -0.32338 | -0.14796 |
| C  | 4.69934  | 0.50949  | 0.92415  |
| H  | 4.68486  | 1.58011  | 0.68677  |
| H  | 5.75111  | 0.19996  | 0.99325  |
| H  | 4.23705  | 0.36541  | 1.91109  |
| C  | 4.19156  | -1.79706 | 0.17666  |
| H  | 3.76358  | -2.06540 | 1.15000  |
| H  | 5.26773  | -2.01276 | 0.20768  |
| H  | 3.73801  | -2.44741 | -0.57985 |
| C  | 1.67305  | -2.45071 | -2.60414 |
| H  | 1.98865  | -3.04931 | -1.74067 |
| H  | 2.23055  | -1.50434 | -2.60657 |
| H  | 1.94252  | -3.00586 | -3.51238 |
| C  | -5.07992 | -2.03815 | -0.92084 |
| H  | -5.04088 | -2.40535 | 0.11487  |
| H  | -5.08320 | -2.92419 | -1.57021 |
| H  | -6.03754 | -1.51982 | -1.05635 |
| C  | 1.84475  | -1.42724 | 3.31362  |

|   |          |          |          |
|---|----------|----------|----------|
| H | 2.63166  | -0.88908 | 2.76401  |
| H | 1.73425  | -2.42795 | 2.88073  |
| H | 2.18532  | -1.53670 | 4.35181  |
| C | -4.86583 | 0.15522  | 1.93244  |
| H | -4.85362 | -0.85040 | 2.37127  |
| H | -5.34844 | 0.07732  | 0.94630  |
| H | -5.50390 | 0.79371  | 2.55757  |
| C | -1.83164 | 4.08716  | 1.10876  |
| H | -1.09162 | 4.25078  | 0.31164  |
| H | -1.45692 | 4.60918  | 2.00156  |
| H | -2.76835 | 4.57527  | 0.81190  |
| C | 4.62989  | -0.02245 | -1.50527 |
| H | 4.52933  | 1.03717  | -1.77369 |
| H | 4.17177  | -0.62540 | -2.30063 |
| H | 5.70170  | -0.26096 | -1.47302 |
| C | 1.82245  | 3.67095  | -0.02247 |
| C | -3.23212 | 2.50119  | -2.09802 |
| H | -3.90711 | 2.96183  | -1.36272 |
| H | -3.68581 | 2.64764  | -3.08854 |
| H | -2.28534 | 3.05793  | -2.07609 |
| C | 0.73652  | 3.09792  | -3.63569 |
| H | 1.53126  | 3.00568  | -4.38871 |
| H | 0.29940  | 4.09883  | -3.73392 |
| H | -0.03870 | 2.36415  | -3.90066 |
| N | 0.33062  | -3.95508 | 1.08653  |
| O | 1.31821  | -2.80651 | 0.61149  |
| O | -0.78878 | -3.55408 | 1.25670  |

## 7\_Df

E (M06/BS1) = -1710.861713 au

H (M06/BS1) = -1709.987472 au

G (M06/BS1) = -1710.106861 au

E (M06/BS2//M06/BS2, Solvent =DiethylEther) = -1711.380018 au

|    |          |          |          |
|----|----------|----------|----------|
| Mo | 0.79384  | -1.17584 | 0.67405  |
| N  | -0.35907 | -1.66215 | -0.87901 |
| N  | -0.01755 | 0.29194  | 1.73679  |
| N  | 2.57211  | -0.50774 | 0.04198  |
| C  | -1.74703 | -1.33425 | -0.80427 |
| C  | -2.58830 | -1.97955 | 0.10763  |
| H  | -2.15677 | -2.70337 | 0.80322  |
| C  | -3.95729 | -1.71172 | 0.14222  |
| C  | -4.47631 | -0.77540 | -0.74957 |
| H  | -5.54603 | -0.55294 | -0.72732 |
| C  | -3.65592 | -0.08416 | -1.64428 |
| C  | -2.29332 | -0.37449 | -1.66223 |
| H  | -1.62685 | 0.16211  | -2.34192 |
| C  | -0.05479 | -2.77850 | -1.83328 |
| C  | -0.83041 | -4.04661 | -1.47192 |
| H  | -1.91376 | -3.90850 | -1.57118 |
| H  | -0.61068 | -4.35123 | -0.43942 |
| H  | -0.53281 | -4.86556 | -2.14180 |
| C  | -0.39986 | -2.35942 | -3.26304 |
| H  | -1.47072 | -2.15277 | -3.37964 |
| H  | -0.13535 | -3.16609 | -3.96108 |
| H  | 0.15783  | -1.45721 | -3.55376 |
| C  | -1.07339 | 1.08713  | 1.19587  |
| C  | -2.40488 | 0.92186  | 1.60121  |
| H  | -2.66021 | 0.11506  | 2.28812  |
| C  | -3.41385 | 1.73848  | 1.09806  |
| C  | -3.08446 | 2.72205  | 0.16032  |
| H  | -3.87638 | 3.35390  | -0.25057 |
| C  | 0.37003  | 0.58980  | 3.15251  |
| C  | 0.43275  | 2.10237  | 3.36921  |
| H  | -0.54586 | 2.57803  | 3.22992  |
| H  | 1.14319  | 2.56929  | 2.67045  |
| H  | 0.76910  | 2.31236  | 4.39398  |
| C  | -0.61459 | -0.04096 | 4.13912  |
| H  | -1.60012 | 0.43705  | 4.09451  |
| H  | -0.24076 | 0.06736  | 5.16737  |
| H  | -0.73252 | -1.11297 | 3.92576  |
| C  | 2.46546  | 0.72192  | -0.68114 |
| C  | 2.71181  | 1.94982  | -0.05205 |
| H  | 3.00155  | 1.95988  | 0.99911  |
| C  | 2.71451  | 4.45550  | 0.00716  |
| H  | 2.75172  | 5.30736  | -0.68261 |
| H  | 3.63456  | 4.45989  | 0.60578  |
| H  | 1.87999  | 4.63150  | 0.70366  |
| C  | 2.08938  | 3.13103  | -2.04695 |
| H  | 1.92668  | 4.07385  | -2.57426 |

|   |          |          |          |
|---|----------|----------|----------|
| C | 1.82585  | 1.92772  | -2.70012 |
| C | -1.77798 | 2.88430  | -0.28838 |
| C | -0.77833 | 2.07167  | 0.25148  |
| H | 0.25624  | 2.20644  | -0.06040 |
| C | 2.02763  | 0.73175  | -2.00828 |
| H | 1.82497  | -0.21719 | -2.50591 |
| C | 3.95426  | -1.04255 | 0.24962  |
| C | 4.84999  | -0.04975 | 0.99693  |
| H | 4.99713  | 0.87730  | 0.43023  |
| H | 5.83797  | -0.50382 | 1.15326  |
| H | 4.43868  | 0.20407  | 1.98275  |
| C | 3.89534  | -2.32876 | 1.06230  |
| H | 3.46771  | -2.16100 | 2.05898  |
| H | 4.91286  | -2.72084 | 1.19212  |
| H | 3.30013  | -3.10388 | 0.56461  |
| C | 1.42918  | -3.11177 | -1.78427 |
| H | 1.72790  | -3.49246 | -0.79716 |
| H | 2.04292  | -2.23779 | -2.02522 |
| H | 1.65268  | -3.89968 | -2.51606 |
| C | -4.83645 | -2.39855 | 1.14573  |
| H | -4.77321 | -3.49196 | 1.06193  |
| H | -5.88809 | -2.11121 | 1.02189  |
| H | -4.54038 | -2.14315 | 2.17417  |
| C | 1.75722  | 0.01925  | 3.43497  |
| H | 2.49965  | 0.43117  | 2.73902  |
| H | 1.77139  | -1.07668 | 3.36524  |
| H | 2.06332  | 0.28657  | 4.45535  |
| C | -4.83519 | 1.57170  | 1.54731  |
| H | -4.99577 | 0.59209  | 2.01499  |
| H | -5.53274 | 1.65885  | 0.70255  |
| H | -5.11905 | 2.34046  | 2.28055  |
| C | -1.44493 | 3.88025  | -1.35974 |
| H | -0.53224 | 4.44512  | -1.12411 |
| H | -2.26143 | 4.59691  | -1.51479 |
| H | -1.26043 | 3.37610  | -2.32179 |
| C | 4.60538  | -1.33629 | -1.10497 |
| H | 4.63196  | -0.44094 | -1.74001 |
| H | 4.07369  | -2.12978 | -1.64443 |
| H | 5.64143  | -1.66976 | -0.95439 |
| C | 2.53023  | 3.15751  | -0.72187 |
| C | -4.22704 | 0.94795  | -2.57112 |
| H | -5.18322 | 1.33664  | -2.19608 |
| H | -4.41141 | 0.53627  | -3.57393 |
| H | -3.54060 | 1.79790  | -2.68829 |
| C | 1.31169  | 1.90109  | -4.10919 |
| H | 1.96035  | 1.30530  | -4.76568 |
| H | 1.23936  | 2.91045  | -4.53199 |
| H | 0.31065  | 1.44737  | -4.15569 |
| O | 0.77547  | -2.59220 | 1.65269  |

## 2\_SF

E (M06/BS1) = -1840.674788 au

H (M06/BS1) = -1839.788791 au

G (M06/BS1) = -1839.910327 au

E (M06/BS2//M06/BS2, Solvent = DiethylEther) = -1841.223669 au

|   |          |          |          |
|---|----------|----------|----------|
| N | 2.49883  | -0.22241 | -0.08344 |
| N | -0.03724 | 0.30105  | 1.75270  |
| N | -0.24414 | -1.56188 | -1.12390 |
| C | -1.64536 | -1.32217 | -0.96712 |
| C | -2.40344 | -2.15541 | -0.14302 |
| C | -2.26959 | -0.28123 | -1.66714 |
| C | -3.78733 | -1.98059 | -0.03551 |
| H | -1.90397 | -2.96272 | 0.39743  |
| C | -3.64583 | -0.10792 | -1.59539 |
| H | -1.65556 | 0.39865  | -2.26143 |
| C | -4.38953 | -0.97394 | -0.78298 |
| H | -5.47240 | -0.84161 | -0.71952 |
| C | 2.29047  | 1.05536  | -0.70718 |
| C | 2.47839  | 2.26060  | -0.01461 |
| C | 1.80645  | 1.12444  | -2.01836 |
| C | 2.17737  | 3.49040  | -0.59772 |
| H | 2.81318  | 2.23983  | 1.02170  |
| H | 1.68053  | 0.20011  | -2.57915 |
| C | 1.68449  | 3.51731  | -1.90429 |
| H | 1.43876  | 4.47715  | -2.36421 |
| C | -1.17929 | 1.02642  | 1.28677  |
| C | -2.47323 | 0.70187  | 1.71717  |
| C | -1.00182 | 2.11894  | 0.43803  |
| C | -3.56370 | 1.47776  | 1.33785  |



|    |          |          |          |
|----|----------|----------|----------|
| H  | -2.62408 | -0.18009 | 2.34091  |
| C  | -2.08630 | 2.89004  | 0.01427  |
| H  | 0.00667  | 2.38163  | 0.12029  |
| C  | -3.35382 | 2.57257  | 0.48987  |
| H  | -4.21055 | 3.17645  | 0.17957  |
| C  | 1.49090  | 2.34080  | -2.62627 |
| C  | 3.93058  | -0.64859 | 0.06308  |
| C  | 0.39555  | 0.63742  | 3.16048  |
| C  | 0.12582  | -2.41374 | -2.30954 |
| C  | 2.29544  | 4.75149  | 0.20569  |
| H  | 3.19490  | 4.75206  | 0.83428  |
| H  | 2.32489  | 5.64063  | -0.43576 |
| H  | 1.43251  | 4.86366  | 0.88039  |
| C  | 0.94173  | 2.36531  | -4.02249 |
| H  | -0.09484 | 1.99701  | -4.05248 |
| H  | 0.93998  | 3.38067  | -4.43682 |
| H  | 1.52613  | 1.72480  | -4.69654 |
| C  | -4.33130 | 0.96488  | -2.38720 |
| H  | -3.61403 | 1.70069  | -2.77233 |
| H  | -4.86627 | 0.54134  | -3.24918 |
| H  | -5.07468 | 1.50120  | -1.78233 |
| C  | -4.58836 | -2.86137 | 0.87630  |
| H  | -4.46717 | -3.92325 | 0.62361  |
| H  | -4.26404 | -2.74652 | 1.92059  |
| H  | -5.65772 | -2.62229 | 0.82983  |
| C  | -1.86219 | 4.02562  | -0.94005 |
| H  | -1.12794 | 4.74491  | -0.54932 |
| H  | -1.45667 | 3.66070  | -1.89619 |
| H  | -2.79168 | 4.56845  | -1.15159 |
| C  | -4.94656 | 1.15574  | 1.82056  |
| H  | -5.31281 | 1.91611  | 2.52470  |
| H  | -5.66337 | 1.12083  | 0.98810  |
| H  | -4.97971 | 0.18554  | 2.33151  |
| C  | -0.26171 | -1.72013 | -3.61529 |
| H  | 0.05965  | -2.34316 | -4.46091 |
| H  | -1.34623 | -1.58074 | -3.69769 |
| H  | 0.21958  | -0.73781 | -3.71647 |
| C  | -0.60513 | -3.75517 | -2.21662 |
| H  | -1.69354 | -3.63762 | -2.28295 |
| H  | -0.28610 | -4.39060 | -3.05436 |
| H  | -0.35489 | -4.26515 | -1.27806 |
| C  | 1.61990  | -2.69071 | -2.30639 |
| H  | 2.20394  | -1.76650 | -2.35465 |
| H  | 1.90491  | -3.24950 | -1.40729 |
| H  | 1.87517  | -3.30131 | -3.18242 |
| C  | 4.62136  | -0.59855 | -1.30343 |
| H  | 4.60657  | 0.41251  | -1.73081 |
| H  | 5.67271  | -0.89732 | -1.19233 |
| H  | 4.15384  | -1.28536 | -2.02002 |
| C  | 3.99865  | -2.07189 | 0.59542  |
| H  | 3.57050  | -2.15261 | 1.60165  |
| H  | 3.47551  | -2.77843 | -0.05958 |
| H  | 5.05064  | -2.38251 | 0.65065  |
| C  | 4.71794  | 0.25425  | 1.01706  |
| H  | 5.74421  | -0.12775 | 1.10767  |
| H  | 4.78386  | 1.28514  | 0.64875  |
| H  | 4.27490  | 0.26166  | 2.02002  |
| C  | 1.89257  | 0.41115  | 3.32737  |
| H  | 2.17900  | -0.62153 | 3.10474  |
| H  | 2.46350  | 1.09249  | 2.68608  |
| H  | 2.17083  | 0.61896  | 4.36970  |
| C  | -0.36464 | -0.24853 | 4.14759  |
| H  | -0.01805 | -0.04937 | 5.17204  |
| H  | -1.44233 | -0.04590 | 4.11758  |
| H  | -0.19118 | -1.30741 | 3.92144  |
| C  | 0.12378  | 2.10946  | 3.47534  |
| H  | -0.94485 | 2.35587  | 3.46438  |
| H  | 0.50871  | 2.32972  | 4.48026  |
| H  | 0.63874  | 2.76957  | 2.76319  |
| Mo | 0.72848  | -0.94243 | 0.43550  |
| O  | 1.40469  | -2.60485 | 2.51080  |
| N  | 1.11069  | -2.72641 | 1.29829  |
| O  | 1.05954  | -3.84302 | 0.76586  |

### 3\_SF

E (M06/BS1) = -1840.670795 au

H (M06/BS1) = -1839.784762 au

G (M06/BS1) = -1839.905463 au

E (M06/BS2//M06/BS2, Solvent =DiethylEther) = -1841.222416 au

|   |          |          |          |
|---|----------|----------|----------|
| N | 2.50671  | -0.25522 | -0.21588 |
| N | 0.07327  | -0.00611 | 1.68017  |
| N | -0.39873 | -1.20729 | -1.35039 |
| C | -1.79626 | -1.04772 | -1.09143 |
| C | -2.51605 | -1.98497 | -0.34604 |
| C | -2.47040 | 0.05934  | -1.62117 |
| C | -3.89242 | -1.84435 | -0.15055 |
| H | -1.98771 | -2.83867 | 0.08325  |
| C | -3.84360 | 0.21092  | -1.45564 |
| H | -1.89500 | 0.81835  | -2.15571 |
| C | -4.54219 | -0.75627 | -0.72600 |
| H | -5.61915 | -0.63921 | -0.58078 |
| C | 2.30093  | 1.10966  | -0.60855 |
| C | 2.56795  | 2.17223  | 0.26868  |
| C | 1.76704  | 1.41113  | -1.86344 |
| C | 2.30332  | 3.49186  | -0.08987 |
| H | 2.94466  | 1.96374  | 1.27014  |
| H | 1.55696  | 0.59610  | -2.55299 |
| C | 1.76378  | 3.75410  | -1.35253 |
| H | 1.53817  | 4.78536  | -1.63410 |
| C | -1.05009 | 0.83210  | 1.37943  |
| C | -2.33513 | 0.49618  | 1.82376  |
| C | -0.86449 | 2.02639  | 0.68478  |
| C | -3.41163 | 1.35131  | 1.60688  |
| H | -2.49935 | -0.46275 | 2.31569  |
| C | -1.93520 | 2.88606  | 0.43011  |
| H | 0.13494  | 2.29675  | 0.35050  |
| C | -3.19454 | 2.54670  | 0.91400  |
| H | -4.03990 | 3.21206  | 0.72158  |
| C | 1.48096  | 2.72302  | -2.24540 |
| C | 3.93483  | -0.72238 | -0.23491 |
| C | 0.52586  | 0.04799  | 3.11900  |
| C | -0.12072 | -1.95740 | -2.62412 |
| C | 2.49581  | 4.59780  | 0.90456  |
| H | 3.32896  | 4.39167  | 1.58775  |
| H | 2.68401  | 5.56039  | 0.41324  |
| H | 1.59304  | 4.72067  | 1.52321  |
| C | 0.84971  | 2.99440  | -3.57882 |
| H | -0.19091 | 2.63568  | -3.60165 |
| H | 0.83387  | 4.06670  | -3.80845 |
| H | 1.38006  | 2.48037  | -4.39174 |
| C | -4.56561 | 1.37820  | -2.06049 |
| H | -3.87877 | 2.20686  | -2.27739 |
| H | -5.05487 | 1.10091  | -3.00543 |
| H | -5.35194 | 1.75491  | -1.39227 |
| C | -4.63851 | -2.84160 | 0.68625  |
| H | -4.51319 | -3.86485 | 0.30718  |
| H | -4.27173 | -2.84288 | 1.72347  |
| H | -5.71291 | -2.62101 | 0.71299  |
| C | -1.71666 | 4.13563  | -0.37128 |
| H | -0.98338 | 4.80308  | 0.10445  |
| H | -1.31899 | 3.89789  | -1.37007 |
| H | -2.64934 | 4.69831  | -0.50331 |
| C | -4.77932 | 1.00604  | 2.11690  |
| H | -4.95851 | 1.44459  | 3.10938  |
| H | -5.56418 | 1.38779  | 1.45038  |
| H | -4.91164 | -0.07959 | 2.20897  |
| C | -0.48807 | -1.08455 | -3.82744 |
| H | -0.22981 | -1.61170 | -4.75652 |
| H | -1.56266 | -0.86694 | -3.85338 |
| H | 0.05477  | -0.12932 | -3.81424 |
| C | -0.91069 | -3.26617 | -2.70988 |
| H | -1.99364 | -3.09608 | -2.74075 |
| H | -0.63018 | -3.79633 | -3.63090 |
| H | -0.68299 | -3.91916 | -1.85837 |
| C | 1.35852  | -2.30582 | -2.71174 |
| H | 1.99181  | -1.41592 | -2.64444 |
| H | 1.64908  | -3.01164 | -1.92201 |
| H | 1.56300  | -2.79530 | -3.67332 |
| C | 4.50751  | -0.54638 | -1.64462 |
| H | 4.44071  | 0.49621  | -1.98166 |
| H | 5.56835  | -0.83151 | -1.64732 |
| H | 3.98963  | -1.18143 | -2.37415 |
| C | 4.01954  | -2.19300 | 0.14650  |
| H | 3.73745  | -2.36536 | 1.19122  |
| H | 3.39258  | -2.82595 | -0.49517 |
| H | 5.05766  | -2.53035 | 0.02562  |
| C | 4.82407  | 0.06551  | 0.73260  |
| H | 5.83857  | -0.35537 | 0.70850  |
| H | 4.90183  | 1.12302  | 0.45393  |

|    |          |          |         |
|----|----------|----------|---------|
| H  | 4.45902  | -0.00346 | 1.76498 |
| C  | 2.00755  | -0.30139 | 3.22416 |
| H  | 2.22688  | -1.34228 | 2.96118 |
| H  | 2.60486  | 0.36232  | 2.58934 |
| H  | 2.33305  | -0.15960 | 4.26364 |
| C  | -0.28001 | -0.94053 | 3.96240 |
| H  | 0.14714  | -1.00566 | 4.97327 |
| H  | -1.32702 | -0.63180 | 4.06427 |
| H  | -0.25123 | -1.94314 | 3.51398 |
| C  | 0.36243  | 1.46684  | 3.67009 |
| H  | -0.68410 | 1.79420  | 3.68802 |
| H  | 0.74386  | 1.49650  | 4.69941 |
| H  | 0.93836  | 2.18613  | 3.06904 |
| Mo | 0.79003  | -1.13530 | 0.25037 |
| O  | 1.76134  | -3.44326 | 2.14991 |
| N  | 1.23433  | -2.74854 | 1.30667 |
| O  | 0.45493  | -3.27374 | 0.37771 |

#### 4\_SF

E (M06/BS1) = -1840.666915 au

H (M06/BS1) = -1839.783130 au

G (M06/BS1) = -1839.909465 au

E (M06/BS2//M06/BS2, Solvent =DiethylEther) = -1841.216318 au

|   |          |          |          |
|---|----------|----------|----------|
| N | 2.54747  | -0.22524 | -0.26038 |
| N | 0.09951  | -0.11172 | 1.74876  |
| N | -0.39309 | -1.34181 | -1.29348 |
| C | -1.75229 | -0.92101 | -1.16923 |
| C | -2.70363 | -1.76684 | -0.59767 |
| C | -2.15073 | 0.33170  | -1.64917 |
| C | -4.05033 | -1.39786 | -0.54144 |
| H | -2.38136 | -2.72557 | -0.18832 |
| C | -3.48548 | 0.72100  | -1.60274 |
| H | -1.39136 | 1.00729  | -2.04982 |
| C | -4.42486 | -0.16293 | -1.06147 |
| H | -5.47585 | 0.13481  | -1.02493 |
| C | 2.35177  | 1.13908  | -0.64249 |
| C | 2.65557  | 2.19632  | 0.22613  |
| C | 1.74306  | 1.45147  | -1.86594 |
| C | 2.35348  | 3.51834  | -0.09674 |
| H | 3.08970  | 1.97717  | 1.20165  |
| H | 1.51284  | 0.64143  | -2.55883 |
| C | 1.73593  | 3.78911  | -1.31833 |
| H | 1.48166  | 4.82099  | -1.57203 |
| C | -0.99733 | 0.77979  | 1.53814  |
| C | -2.30064 | 0.41868  | 1.90173  |
| C | -0.77441 | 2.03501  | 0.97209  |
| C | -3.35911 | 1.30467  | 1.72621  |
| H | -2.48343 | -0.57953 | 2.30292  |
| C | -1.82545 | 2.92999  | 0.76201  |
| H | 0.24030  | 2.31104  | 0.68696  |
| C | -3.10479 | 2.56014  | 1.16307  |
| H | -3.93612 | 3.25329  | 1.01060  |
| C | 1.41717  | 2.76408  | -2.21035 |
| C | 3.96068  | -0.71799 | -0.25274 |
| C | 0.66243  | -0.12010 | 3.13873  |
| C | -0.09354 | -2.13716 | -2.53278 |
| C | 2.61161  | 4.60631  | 0.90318  |
| H | 3.65120  | 4.59812  | 1.25622  |
| H | 2.40160  | 5.59883  | 0.48660  |
| H | 1.97258  | 4.47456  | 1.79011  |
| C | 0.70235  | 3.05996  | -3.49588 |
| H | 0.97535  | 2.34801  | -4.28530 |
| H | -0.38972 | 2.99298  | -3.36802 |
| H | 0.92149  | 4.07201  | -3.85783 |
| C | -3.92410 | 2.04962  | -2.14355 |
| H | -3.08001 | 2.74435  | -2.24372 |
| H | -4.38569 | 1.94580  | -3.13614 |
| H | -4.67201 | 2.51900  | -1.48970 |
| C | -5.05647 | -2.32359 | 0.07628  |
| H | -5.18930 | -3.23506 | -0.52305 |
| H | -4.73581 | -2.64799 | 1.07651  |
| H | -6.03836 | -1.84393 | 0.17527  |
| C | -1.56332 | 4.24616  | 0.09100  |
| H | -0.80410 | 4.83391  | 0.62713  |
| H | -1.17197 | 4.09548  | -0.92734 |
| H | -2.47485 | 4.85284  | 0.01890  |
| C | -4.75458 | 0.92998  | 2.12773  |
| H | -5.04348 | 1.40629  | 3.07568  |
| H | -5.48416 | 1.25058  | 1.37077  |

|    |          |          |          |
|----|----------|----------|----------|
| H  | -4.85778 | -0.15466 | 2.25672  |
| C  | -0.44905 | -1.33895 | -3.7858  |
| H  | -0.18349 | -1.92089 | -4.67909 |
| H  | -1.52138 | -1.11407 | -3.83595 |
| H  | 0.10285  | -0.38921 | -3.82381 |
| C  | -0.88020 | -3.44878 | -2.52486 |
| H  | -1.96262 | -3.27845 | -2.55855 |
| H  | -0.60512 | -4.04389 | -3.40682 |
| H  | -0.64594 | -4.03999 | -1.62890 |
| C  | 1.38944  | -2.47782 | -2.56882 |
| H  | 2.00675  | -1.57264 | -2.58477 |
| H  | 1.68108  | -3.09417 | -1.70616 |
| H  | 1.61266  | -3.05783 | -3.47412 |
| C  | 4.54799  | -0.59921 | -1.66228 |
| H  | 4.50573  | 0.43628  | -2.02629 |
| H  | 5.60231  | -0.90897 | -1.65819 |
| H  | 4.01436  | -1.23831 | -2.37681 |
| C  | 3.98951  | -2.17845 | 0.17649  |
| H  | 3.62061  | -2.31524 | 1.20056  |
| H  | 3.38602  | -2.81333 | -0.48189 |
| H  | 5.02482  | -2.54427 | 0.14100  |
| C  | 4.86946  | 0.07634  | 0.69370  |
| H  | 5.86698  | -0.38431 | 0.70603  |
| H  | 4.99321  | 1.11616  | 0.36835  |
| H  | 4.49185  | 0.07721  | 1.72512  |
| C  | 1.93428  | -0.95808 | 3.15467  |
| H  | 1.73521  | -2.01277 | 2.92205  |
| H  | 2.67035  | -0.56820 | 2.43925  |
| H  | 2.38913  | -0.92276 | 4.15329  |
| C  | -0.33887 | -0.74515 | 4.11005  |
| H  | 0.12279  | -0.84460 | 5.10271  |
| H  | -1.23865 | -0.12798 | 4.21919  |
| H  | -0.63935 | -1.74496 | 3.76706  |
| C  | 1.00027  | 1.29877  | 3.59456  |
| H  | 0.10845  | 1.93645  | 3.63663  |
| H  | 1.44178  | 1.26827  | 4.60024  |
| H  | 1.72502  | 1.77016  | 2.91564  |
| Mo | 0.81260  | -1.07964 | 0.21488  |
| O  | 1.02400  | -3.03284 | 0.75542  |
| N  | -0.08983 | -3.55273 | 1.30047  |
| O  | 0.04482  | -4.70092 | 1.61202  |

## 5\_SF

E (M06/BS1) = -1840.672702 au

H (M06/BS1) = -1839.786664 au

G (M06/BS1) = -1839.906941 au

E (M06/BS2//M06/BS2, Solvent =DiethylEther) = -1841.220426 au

|    |          |          |          |
|----|----------|----------|----------|
| Mo | -0.64148 | -1.03699 | -0.48190 |
| N  | 0.34745  | -1.45268 | 1.16574  |
| N  | -0.03409 | 0.40628  | -1.67666 |
| N  | -2.46019 | -0.44625 | 0.06086  |
| C  | 1.73718  | -1.24051 | 0.90628  |
| C  | 2.43254  | -2.05258 | 0.00268  |
| H  | 1.90048  | -2.85098 | -0.51895 |
| C  | 3.80453  | -1.87765 | -0.21018 |
| C  | 4.47498  | -0.91359 | 0.53416  |
| H  | 5.55356  | -0.79433 | 0.40320  |
| C  | 3.80136  | -0.07583 | 1.43293  |
| C  | 2.43086  | -0.23484 | 1.59415  |
| H  | 1.87370  | 0.42876  | 2.25925  |
| C  | 0.07818  | -2.37437 | 2.32549  |
| C  | 0.86049  | -3.68383 | 2.19679  |
| H  | 1.94495  | -3.52121 | 2.21754  |
| H  | 0.59928  | -4.20858 | 1.27017  |
| H  | 0.60638  | -4.33457 | 3.04500  |
| C  | 0.49236  | -1.68407 | 3.62812  |
| H  | 1.57158  | -1.49180 | 3.66088  |
| H  | 0.24076  | -2.33076 | 4.47993  |
| H  | -0.03064 | -0.72680 | 3.76109  |
| C  | 1.07976  | 1.14199  | -1.16333 |
| C  | 2.37672  | 0.95189  | -1.66108 |
| H  | 2.56220  | 0.14537  | -2.37095 |
| C  | 3.42491  | 1.76637  | -1.24828 |
| C  | 3.16941  | 2.77338  | -0.30868 |
| H  | 3.99134  | 3.41450  | 0.02102  |
| C  | -0.48728 | 0.85360  | -3.04510 |
| C  | -0.37072 | 2.37701  | -3.16721 |
| H  | 0.66507  | 2.73017  | -3.09141 |
| H  | -0.96461 | 2.88065  | -2.39012 |

|   |          |          |          |
|---|----------|----------|----------|
| H | -0.75927 | 2.68496  | -4.14753 |
| C | 0.36241  | 0.18802  | -4.12978 |
| H | 1.40272  | 0.53329  | -4.10142 |
| H | -0.03971 | 0.43909  | -5.12193 |
| H | 0.34526  | -0.90259 | -4.01516 |
| C | -2.38818 | 0.83900  | 0.70612  |
| C | -2.73524 | 2.02871  | 0.04413  |
| H | -3.11955 | 1.98595  | -0.97298 |
| C | -2.91354 | 4.52882  | -0.10892 |
| H | -2.26494 | 5.36681  | 0.17712  |
| H | -3.94841 | 4.83644  | 0.09815  |
| H | -2.82858 | 4.38900  | -1.19449 |
| C | -2.00855 | 3.34413  | 1.92162  |
| H | -1.83618 | 4.31988  | 2.38188  |
| C | -1.66687 | 2.18707  | 2.61585  |
| C | 1.90184  | 2.95380  | 0.23414  |
| C | 0.85975  | 2.13806  | -0.21262 |
| H | -0.15339 | 2.30566  | 0.15075  |
| C | -1.87335 | 0.95012  | 2.00062  |
| H | -1.59409 | 0.04419  | 2.53196  |
| C | -3.84556 | -1.00390 | -0.10620 |
| C | -4.76099 | -0.10490 | -0.94434 |
| H | -4.94939 | 0.86155  | -0.46215 |
| H | -5.73267 | -0.60292 | -1.06767 |
| H | -4.34782 | 0.07022  | -1.94528 |
| C | -3.78193 | -2.36233 | -0.78768 |
| H | -3.40438 | -2.28122 | -1.81360 |
| H | -4.79311 | -2.78869 | -0.83274 |
| H | -3.1438  | -3.06427 | -0.23962 |
| C | -1.40186 | -2.71667 | 2.41179  |
| H | -1.74405 | -3.25272 | 1.51960  |
| H | -2.01948 | -1.82362 | 2.54097  |
| H | -1.56743 | -3.36736 | 3.28097  |
| C | 4.52425  | -2.70759 | -1.23051 |
| H | 4.34367  | -2.32426 | -2.24582 |
| H | 4.18434  | -3.75115 | -1.21996 |
| H | 5.6086   | -2.69889 | -1.06612 |
| C | -1.95372 | 0.51022  | -3.28707 |
| H | -2.59305 | 1.02280  | -2.56250 |
| H | -2.15548 | -0.56330 | -3.24236 |
| H | -2.23752 | 0.86225  | -4.28816 |
| C | 4.81242  | 1.57137  | -1.78225 |
| H | 4.84057  | 0.80260  | -2.56460 |
| H | 5.50252  | 1.25529  | -0.98606 |
| H | 5.21556  | 2.50129  | -2.20593 |
| C | 1.63177  | 3.99600  | 1.27873  |
| H | 1.22662  | 3.53846  | 2.19406  |
| H | 0.88039  | 4.72324  | 0.93779  |
| H | 2.54110  | 4.54782  | 1.54753  |
| C | -4.49688 | -1.17180 | 1.26992  |
| H | -4.52951 | -0.22196 | 1.82042  |
| H | -3.96278 | -1.91030 | 1.87933  |
| H | -5.53115 | -1.52271 | 1.14855  |
| C | -2.55262 | 3.27675  | 0.63546  |
| C | 4.55634  | 0.95554  | 2.21702  |
| H | 5.27591  | 1.49411  | 1.58530  |
| H | 5.13044  | 0.49351  | 3.03292  |
| H | 3.88020  | 1.69526  | 2.66485  |
| C | -1.05374 | 2.24994  | 3.98421  |
| H | -0.01976 | 1.87236  | 3.97397  |
| H | -1.60793 | 1.63309  | 4.70485  |
| H | -1.02839 | 3.27691  | 4.36880  |
| N | -0.89902 | -3.31828 | -1.88134 |
| O | -0.68499 | -3.21137 | -0.62867 |
| O | -1.04544 | -2.14541 | -2.33545 |

## 6\_SF

E (M06/BS1) = -1840.651929 au

H (M06/BS1) = -1839.766697 au

G (M06/BS1) = -1839.884823 au

E (M06/BS2//M06/BS2, Solvent=DiethylEther) = -1841.206106 au

|   |          |          |          |
|---|----------|----------|----------|
| N | 2.47665  | -0.46957 | -0.31563 |
| N | 0.17316  | 0.16742  | 1.69056  |
| N | -0.46198 | -1.34897 | -1.08467 |
| C | -1.86736 | -1.11432 | -0.89879 |
| C | -2.70747 | -1.94455 | -0.15737 |
| C | -2.41658 | -0.00292 | -1.55038 |
| C | -4.08094 | -1.69484 | -0.08992 |
| H | -2.28153 | -2.78291 | 0.39111  |

|   |          |          |          |
|---|----------|----------|----------|
| C | -3.78301 | 0.25378  | -1.51385 |
| H | -1.75140 | 0.67601  | -2.08714 |
| C | -4.60561 | -0.60903 | -0.78465 |
| H | -5.67939 | -0.41073 | -0.73634 |
| C | 2.25615  | 0.86295  | -0.78530 |
| C | 2.71196  | 1.96762  | -0.04269 |
| C | 1.59536  | 1.11453  | -1.98724 |
| C | 2.52935  | 3.27188  | -0.48735 |
| H | 3.21203  | 1.79965  | 0.91153  |
| H | 1.23535  | 0.27434  | -2.57645 |
| C | 1.86052  | 3.48383  | -1.69910 |
| H | 1.69775  | 4.50579  | -2.05011 |
| C | -0.93380 | 0.98703  | 1.27565  |
| C | -2.22727 | 0.68266  | 1.71706  |
| C | -0.71709 | 2.14143  | 0.52717  |
| C | -3.28765 | 1.54521  | 1.45288  |
| H | -2.40541 | -0.24751 | 2.25742  |
| C | -1.77065 | 3.00685  | 0.22843  |
| H | 0.29168  | 2.38567  | 0.20491  |
| C | -3.03989 | 2.70713  | 0.71538  |
| H | -3.86925 | 3.38483  | 0.49727  |
| C | 1.37736  | 2.41663  | -2.44911 |
| C | 3.92470  | -0.92170 | -0.32429 |
| C | 0.62450  | 0.44319  | 3.11307  |
| C | -0.21559 | -2.26434 | -2.26678 |
| C | 2.96457  | 4.43742  | 0.35057  |
| H | 3.67620  | 4.13434  | 1.12823  |
| H | 3.43434  | 5.22205  | -0.25641 |
| H | 2.10190  | 4.89765  | 0.85621  |
| C | 0.61259  | 2.64291  | -3.71978 |
| H | -0.44700 | 2.36816  | -3.59797 |
| H | 0.64620  | 3.69455  | -4.02956 |
| H | 1.00415  | 2.03260  | -4.54475 |
| C | -4.36692 | 1.42742  | -2.24287 |
| H | -3.59051 | 2.14839  | -2.53151 |
| H | -4.88489 | 1.11459  | -3.16078 |
| H | -5.10531 | 1.95582  | -1.62405 |
| C | -4.95989 | -2.58168 | 0.74264  |
| H | -4.92351 | -3.62564 | 0.40280  |
| H | -4.63887 | -2.58182 | 1.79457  |
| H | -6.00673 | -2.25476 | 0.71199  |
| C | -1.52709 | 4.22049  | -0.61873 |
| H | -0.57110 | 4.70113  | -0.36985 |
| H | -1.47666 | 3.95361  | -1.68587 |
| H | -2.32676 | 4.96281  | -0.50397 |
| C | -4.66812 | 1.24994  | 1.96026  |
| H | -4.89752 | 1.83634  | 2.86168  |
| H | -5.43077 | 1.50071  | 1.21039  |
| H | -4.78553 | 0.18915  | 2.21561  |
| C | -0.67060 | -1.60255 | -3.56931 |
| H | -0.44830 | -2.27909 | -4.40577 |
| H | -1.74855 | -1.40469 | -3.57443 |
| H | -0.14767 | -0.65513 | -3.75554 |
| C | -0.96695 | -3.59003 | -2.10261 |
| H | -2.05441 | -3.45848 | -2.13248 |
| H | -0.68844 | -4.25978 | -2.92791 |
| H | -0.69867 | -4.07719 | -1.15658 |
| C | 1.26185  | -2.59602 | -2.37807 |
| H | 1.88187  | -1.70285 | -2.50149 |
| H | 1.61334  | -3.14368 | -1.49254 |
| H | 1.42083  | -3.25232 | -3.24430 |
| C | 4.72336  | -0.12454 | -1.36178 |
| H | 4.82682  | 0.93596  | -1.10542 |
| H | 5.73251  | -0.55208 | -1.42941 |
| H | 4.26108  | -0.19336 | -2.35650 |
| C | 4.06593  | -2.39102 | -0.73749 |
| H | 3.46860  | -3.06713 | -0.12076 |
| H | 3.80025  | -2.53847 | -1.79066 |
| H | 5.11976  | -2.68090 | -0.62576 |
| C | 4.58287  | -0.74839 | 1.04523  |
| H | 5.63079  | -1.07653 | 0.99417  |
| H | 4.58686  | 0.30057  | 1.36748  |
| H | 4.07317  | -1.35121 | 1.80437  |
| C | 2.03953  | -0.07154 | 3.34036  |
| H | 2.11295  | -1.15936 | 3.25464  |
| H | 2.74658  | 0.38939  | 2.64146  |
| H | 2.35048  | 0.20046  | 4.35767  |
| C | -0.32099 | -0.22865 | 4.10882  |
| H | 0.09066  | -0.12231 | 5.12229  |
| H | -1.31357 | 0.23618  | 4.10555  |

|    |          |          |         |
|----|----------|----------|---------|
| H  | -0.42292 | -1.29766 | 3.88697 |
| C  | 0.64383  | 1.95334  | 3.36310 |
| H  | -0.35297 | 2.40507  | 3.29528 |
| H  | 1.02705  | 2.13284  | 4.37640 |
| H  | 1.30758  | 2.46597  | 2.65209 |
| Mo | 0.77721  | -1.24275 | 0.49560 |
| O  | 1.95273  | -2.64140 | 1.29115 |
| N  | 0.79129  | -2.57528 | 2.00783 |
| O  | -0.17095 | -2.96229 | 1.10027 |

### TS4\_SF

E (M06/BS1) = -1840.661864 au

H (M06/BS1) = -1839.778935 au

G (M06/BS1) = -1839.901280 au

E (M06/BS2//M06/BS2, Solvent =DiethylEther) = -1841.211445 au

|   |          |          |          |
|---|----------|----------|----------|
| N | 2.57102  | -0.27644 | -0.21000 |
| N | 0.10248  | -0.03996 | 1.76078  |
| N | -0.35433 | -1.43623 | -1.21089 |
| C | -1.69386 | -0.94551 | -1.17878 |
| C | -2.69939 | -1.68463 | -0.55265 |
| C | -2.02359 | 0.26245  | -1.80385 |
| C | -4.02823 | -1.25541 | -0.57736 |
| H | -2.43462 | -2.61556 | -0.04682 |
| C | -3.33888 | 0.71638  | -1.83035 |
| H | -1.22806 | 0.85163  | -2.26570 |
| C | -4.33288 | -0.06384 | -1.23061 |
| H | -5.37030 | 0.27995  | -1.26168 |
| C | 2.37000  | 1.06738  | -0.65730 |
| C | 2.66615  | 2.16389  | 0.16102  |
| C | 1.77006  | 1.31393  | -1.89989 |
| C | 2.36669  | 3.46881  | -0.23336 |
| H | 3.09293  | 1.99053  | 1.14951  |
| H | 1.53906  | 0.46303  | -2.54037 |
| C | 1.75481  | 3.67390  | -1.46966 |
| H | 1.49660  | 4.69072  | -1.77610 |
| C | -1.00989 | 0.81984  | 1.50143  |
| C | -2.30335 | 0.48436  | 1.92095  |
| C | -0.80261 | 2.03897  | 0.85733  |
| C | -3.36473 | 1.36408  | 1.72765  |
| H | -2.47788 | -0.48841 | 2.38492  |
| C | -1.85670 | 2.92480  | 0.62693  |
| H | 0.20535  | 2.29991  | 0.53573  |
| C | -3.12536 | 2.58472  | 1.08628  |
| H | -3.95759 | 3.27631  | 0.92897  |
| C | 1.44524  | 2.60458  | -2.31374 |
| C | 3.97842  | -0.78116 | -0.22026 |
| C | 0.66281  | 0.06786  | 3.15327  |
| C | -0.06058 | -2.36185 | -2.35879 |
| C | 2.62626  | 4.61158  | 0.70294  |
| H | 3.64780  | 4.58422  | 1.10403  |
| H | 2.47956  | 5.58049  | 0.21058  |
| H | 1.94413  | 4.57187  | 1.56601  |
| C | 0.76686  | 2.84685  | -3.63010 |
| H | 0.56471  | 1.90721  | -4.15970 |
| H | -0.19269 | 3.36694  | -3.49323 |
| H | 1.37734  | 3.47885  | -4.28935 |
| C | -3.68649 | 2.03337  | -2.45560 |
| H | -2.89264 | 2.38628  | -3.12673 |
| H | -4.62088 | 1.97910  | -3.02957 |
| H | -3.82701 | 2.80148  | -1.67920 |
| C | -5.09020 | -2.06870 | 0.10226  |
| H | -5.14213 | -3.08749 | -0.30551 |
| H | -4.88553 | -2.17096 | 1.17805  |
| H | -6.08184 | -1.61218 | -0.00778 |
| C | -1.60337 | 4.20360  | -0.11576 |
| H | -0.80869 | 4.79867  | 0.35649  |
| H | -1.26780 | 3.99632  | -1.14393 |
| H | -2.50534 | 4.82595  | -0.17348 |
| C | -4.75397 | 1.00521  | 2.16160  |
| H | -4.75795 | 0.14410  | 2.84125  |
| H | -5.24817 | 1.84365  | 2.67019  |
| H | -5.37628 | 0.74275  | 1.29282  |
| C | -0.19250 | -1.62640 | -3.69212 |
| H | -0.00647 | -2.32693 | -4.51808 |
| H | -1.19784 | -1.20743 | -3.82461 |
| H | 0.53576  | -0.80829 | -3.77741 |
| C | -1.01128 | -3.55904 | -2.35314 |
| H | -2.04870 | -3.26175 | -2.54768 |
| H | -0.70840 | -4.26175 | -3.14201 |

|    |          |          |          |
|----|----------|----------|----------|
| H  | -0.96987 | -4.08168 | -1.38895 |
| C  | 1.36016  | -2.88831 | -2.21876 |
| H  | 2.08142  | -2.06295 | -2.17185 |
| H  | 1.46652  | -3.51522 | -1.32190 |
| H  | 1.61691  | -3.50873 | -3.08774 |
| C  | 4.52535  | -0.74145 | -1.65065 |
| H  | 4.51438  | 0.28108  | -2.05120 |
| H  | 5.56543  | -1.09557 | -1.66675 |
| H  | 3.94308  | -1.37888 | -2.32830 |
| C  | 4.00703  | -2.21350 | 0.29668  |
| H  | 3.65066  | -2.27561 | 1.33279  |
| H  | 3.39359  | -2.88602 | -0.31401 |
| H  | 5.03998  | -2.58673 | 0.27165  |
| C  | 4.91562  | 0.05922  | 0.65464  |
| H  | 5.91770  | -0.39140 | 0.64544  |
| H  | 5.01466  | 1.08573  | 0.28191  |
| H  | 4.57781  | 0.09761  | 1.69871  |
| C  | 1.99161  | -0.67416 | 3.22832  |
| H  | 1.86893  | -1.74881 | 3.04268  |
| H  | 2.70920  | -0.26512 | 2.50482  |
| H  | 2.42162  | -0.55619 | 4.23177  |
| C  | -0.29694 | -0.55900 | 4.16507  |
| H  | 0.16331  | -0.54398 | 5.16336  |
| H  | -1.24171 | -0.00561 | 4.22560  |
| H  | -0.51439 | -1.60269 | 3.89924  |
| C  | 0.90357  | 1.53186  | 3.52150  |
| H  | -0.03086 | 2.10485  | 3.56053  |
| H  | 1.37734  | 1.58790  | 4.51118  |
| H  | 1.56970  | 2.01372  | 2.79282  |
| Mo | 0.84062  | -1.11197 | 0.30509  |
| O  | 0.87836  | -2.90838 | 1.15386  |
| N  | -0.12198 | -3.50724 | 1.83726  |
| O  | -0.83872 | -4.18052 | 1.15287  |

### TS9\_SF

E (M06/BS1) = -1840.649433 au

H (M06/BS1) = -1839.765672 au

G (M06/BS1) = -1839.885078 au

E (M06/BS2//M06/BS2, Solvent =DiethylEther) = -1841.203867 au

|   |          |          |          |
|---|----------|----------|----------|
| N | 2.52510  | -0.04880 | -0.12482 |
| N | 0.00313  | 0.41000  | 1.61164  |
| N | -0.13133 | -1.6532  | -0.93561 |
| C | -1.53877 | -1.42625 | -0.79639 |
| C | -2.31086 | -2.23002 | 0.04328  |
| C | -2.16809 | -0.44533 | -1.57326 |
| C | -3.70370 | -2.10754 | 0.07025  |
| H | -1.81482 | -2.96118 | 0.68389  |
| C | -3.54997 | -0.31039 | -1.57048 |
| H | -1.55276 | 0.20253  | -2.20057 |
| C | -4.30443 | -1.16409 | -0.75600 |
| H | -5.39288 | -1.06511 | -0.74805 |
| C | 2.04441  | 1.13847  | -0.76950 |
| C | 2.20433  | 2.39234  | -0.15431 |
| C | 1.41836  | 1.09106  | -2.01534 |
| C | 1.78873  | 3.56497  | -0.77190 |
| H | 2.66588  | 2.44185  | 0.83386  |
| H | 1.26777  | 0.12463  | -2.49430 |
| C | 1.17160  | 3.48072  | -2.02633 |
| H | 0.82663  | 4.39599  | -2.51344 |
| C | -1.22446 | 1.00881  | 1.18453  |
| C | -2.45391 | 0.58132  | 1.70295  |
| C | -1.19739 | 2.08381  | 0.30132  |
| C | -3.63275 | 1.24098  | 1.36830  |
| H | -2.48975 | -0.29896 | 2.34502  |
| C | -2.36993 | 2.74542  | -0.06753 |
| H | -0.24258 | 2.41627  | -0.09523 |
| C | -3.57335 | 2.32917  | 0.49106  |
| H | -4.49829 | 2.84548  | 0.22096  |
| C | 0.96380  | 2.25404  | -2.64922 |
| C | 4.03895  | -0.20543 | -0.11891 |
| C | 0.43239  | 0.81039  | 3.00486  |
| C | 0.17964  | -2.74352 | -1.94356 |
| C | 1.91480  | 4.88691  | -0.07497 |
| H | 2.70401  | 4.87061  | 0.68671  |
| H | 2.13431  | 5.69859  | -0.77987 |
| H | 0.97496  | 5.14829  | 0.43558  |
| C | 0.24651  | 2.16331  | -3.96368 |
| H | -0.75975 | 1.73238  | -3.83834 |
| H | 0.12412  | 3.15054  | -4.42572 |



|    |          |          |          |
|----|----------|----------|----------|
| H  | 0.77910  | 1.51739  | -4.67421 |
| C  | -4.23079 | 0.71116  | -2.43130 |
| H  | -3.51344 | 1.43505  | -2.84028 |
| H  | -4.74885 | 0.24102  | -3.27943 |
| H  | -4.98745 | 1.27131  | -1.86381 |
| C  | -4.51628 | -2.96369 | 0.99601  |
| H  | -4.38718 | -4.03314 | 0.78061  |
| H  | -4.21026 | -2.81428 | 2.04184  |
| H  | -5.58620 | -2.73185 | 0.92438  |
| C  | -2.31041 | 3.86462  | -1.06484 |
| H  | -1.63298 | 4.66627  | -0.73711 |
| H  | -1.92272 | 3.50693  | -2.03167 |
| H  | -3.29975 | 4.30593  | -1.23910 |
| C  | -4.95159 | 0.80002  | 1.93042  |
| H  | -5.34475 | 1.52992  | 2.65237  |
| H  | -5.70723 | 0.69599  | 1.13875  |
| H  | -4.86884 | -0.16505 | 2.44575  |
| C  | -0.67274 | -2.55698 | -3.20256 |
| H  | -0.36401 | -3.30786 | -3.94242 |
| H  | -1.74445 | -2.69486 | -3.01648 |
| H  | -0.52151 | -1.56353 | -3.64867 |
| C  | -0.11012 | -4.12350 | -1.35127 |
| H  | -1.17921 | -4.25145 | -1.14169 |
| H  | 0.18268  | -4.90158 | -2.07048 |
| H  | 0.45471  | -4.28318 | -0.42505 |
| C  | 1.63473  | -2.68218 | -2.38081 |
| H  | 1.87504  | -1.72584 | -2.86250 |
| H  | 2.31886  | -2.84057 | -1.54738 |
| H  | 1.81629  | -3.47806 | -3.11552 |
| C  | 4.75191  | 0.98459  | -0.77449 |
| H  | 4.63132  | 1.92216  | -0.22142 |
| H  | 5.82507  | 0.75524  | -0.80042 |
| H  | 4.42073  | 1.14892  | -1.80829 |
| C  | 4.44169  | -1.42805 | -0.94586 |
| H  | 4.06280  | -2.36033 | -0.52003 |
| H  | 4.07515  | -1.33365 | -1.97698 |
| H  | 5.53765  | -1.49773 | -0.98342 |
| C  | 4.59847  | -0.34017 | 1.29757  |
| H  | 5.67739  | -0.54035 | 1.23833  |
| H  | 4.46726  | 0.58867  | 1.86753  |
| H  | 4.13412  | -1.15835 | 1.85663  |
| C  | 1.91648  | 0.52206  | 3.19371  |
| H  | 2.15808  | -0.54484 | 3.10695  |
| H  | 2.51955  | 1.08274  | 2.47098  |
| H  | 2.21712  | 0.83551  | 4.20228  |
| C  | -0.35706 | 0.02555  | 4.05360  |
| H  | 0.07366  | 0.20870  | 5.04808  |
| H  | -1.40817 | 0.33400  | 4.08657  |
| H  | -0.30481 | -1.05171 | 3.84800  |
| C  | 0.22692  | 2.31217  | 3.20681  |
| H  | -0.82973 | 2.60246  | 3.16364  |
| H  | 0.61234  | 2.59217  | 4.19680  |
| H  | 0.77513  | 2.89016  | 2.44882  |
| Mo | 0.90716  | -1.01647 | 0.62239  |
| O  | 2.40274  | -3.25890 | 0.61958  |
| N  | 2.28579  | -2.39694 | 1.46380  |
| O  | 0.63953  | -2.31967 | 1.90783  |

### TS16\_SF

E (M06/BS1) = -1840.648350 au

H (M06/BS1) = -1839.767470 au

G (M06/BS1) = -1839.893047 au

E (M06/BS2//M06/BS2, Solvent =DiethylEther) = -1841.203198 au

|   |          |          |          |
|---|----------|----------|----------|
| N | 2.57850  | -0.22109 | -0.26143 |
| N | 0.12436  | -0.22261 | 1.77745  |
| N | -0.31431 | -1.27831 | -1.33985 |
| C | -1.64697 | -0.77403 | -1.28672 |
| C | -2.69056 | -1.54691 | -0.77540 |
| C | -1.94337 | 0.49564  | -1.79995 |
| C | -4.01448 | -1.10487 | -0.81889 |
| H | -2.46498 | -2.51821 | -0.33165 |
| C | -3.25288 | 0.96334  | -1.84914 |
| H | -1.12371 | 1.12479  | -2.15496 |
| C | -4.28173 | 0.14377  | -1.37203 |
| H | -5.31366 | 0.50232  | -1.41498 |
| C | 2.33603  | 1.14632  | -0.60869 |
| C | 2.60700  | 2.18689  | 0.28788  |
| C | 1.72817  | 1.46917  | -1.82995 |
| C | 2.27316  | 3.50939  | -0.00458 |

|    |          |          |          |
|----|----------|----------|----------|
| H  | 3.04257  | 1.95393  | 1.25939  |
| H  | 1.50307  | 0.66423  | -2.53067 |
| C  | 1.65519  | 3.79157  | -1.22177 |
| H  | 1.36807  | 4.82079  | -1.45025 |
| C  | -1.00919 | 0.62872  | 1.60486  |
| C  | -2.29223 | 0.22065  | 1.99352  |
| C  | -0.84431 | 1.90685  | 1.07007  |
| C  | -3.37858 | 1.08493  | 1.89335  |
| H  | -2.43499 | -0.79502 | 2.36800  |
| C  | -1.92366 | 2.78166  | 0.93344  |
| H  | 0.1513   | 2.22382  | 0.75748  |
| C  | -3.17781 | 2.36667  | 1.36943  |
| H  | -4.03004 | 3.04615  | 1.28187  |
| C  | 1.38024  | 2.78214  | -2.14730 |
| C  | 4.00049  | -0.67957 | -0.29728 |
| C  | 0.70346  | -0.21742 | 3.16333  |
| C  | -0.05515 | -2.19199 | -2.50336 |
| C  | 2.50650  | 4.58143  | 1.01875  |
| H  | 3.55389  | 4.60893  | 1.34736  |
| H  | 2.24622  | 5.57403  | 0.63179  |
| H  | 1.89526  | 4.40293  | 1.91651  |
| C  | 0.73383  | 3.11430  | -3.46025 |
| H  | 0.22766  | 2.24400  | -3.89803 |
| H  | -0.00709 | 3.91746  | -3.34928 |
| H  | 1.47388  | 3.46181  | -4.19513 |
| C  | -3.56527 | 2.33146  | -2.37740 |
| H  | -2.70734 | 2.76868  | -2.90460 |
| H  | -4.41718 | 2.31458  | -3.07042 |
| H  | -3.83327 | 3.01642  | -1.55878 |
| C  | -5.10729 | -1.96753 | -0.25943 |
| H  | -5.12463 | -2.95826 | -0.73399 |
| H  | -4.96624 | -2.13463 | 0.81893  |
| H  | -6.09546 | -1.51107 | -0.39822 |
| C  | -1.71431 | 4.12800  | 0.30484  |
| H  | -0.90003 | 4.68357  | 0.79164  |
| H  | -1.43110 | 4.02375  | -0.75468 |
| H  | -2.62139 | 4.74418  | 0.35047  |
| C  | -4.75486 | 0.65052  | 2.29964  |
| H  | -5.25157 | 1.40969  | 2.91871  |
| H  | -5.39251 | 0.49157  | 1.41655  |
| H  | -4.73448 | -0.28858 | 2.86678  |
| C  | -0.50908 | -1.54261 | -3.81109 |
| H  | -0.25002 | -2.19685 | -4.65522 |
| H  | -1.59334 | -1.37711 | -3.83445 |
| H  | -0.01252 | -0.57429 | -3.96659 |
| C  | -0.77308 | -3.53118 | -2.32652 |
| H  | -1.86305 | -3.41253 | -2.34264 |
| H  | -0.49896 | -4.21203 | -3.14503 |
| H  | -0.48108 | -4.00213 | -1.37703 |
| C  | 1.43833  | -2.47049 | -2.60654 |
| H  | 2.00923  | -1.54220 | -2.72510 |
| H  | 1.80897  | -3.00961 | -1.72393 |
| H  | 1.63623  | -3.10851 | -3.47849 |
| C  | 4.55584  | -0.52582 | -1.71542 |
| H  | 4.48808  | 0.51521  | -2.05900 |
| H  | 5.61486  | -0.81834 | -1.73877 |
| H  | 4.01550  | -1.16102 | -2.42833 |
| C  | 4.08107  | -2.14458 | 0.11361  |
| H  | 3.70792  | -2.30620 | 1.13270  |
| H  | 3.51005  | -2.79253 | -0.56066 |
| H  | 5.12973  | -2.47003 | 0.08152  |
| C  | 4.89998  | 0.12600  | 0.64778  |
| H  | 5.91387  | -0.29679 | 0.62869  |
| H  | 4.97704  | 1.17698  | 0.34499  |
| H  | 4.54088  | 0.08783  | 1.68526  |
| C  | 2.00058  | -1.01755 | 3.17625  |
| H  | 1.82494  | -2.07809 | 2.95670  |
| H  | 2.71618  | -0.61820 | 2.44400  |
| H  | 2.46588  | -0.94923 | 4.16871  |
| C  | -0.26265 | -0.86169 | 4.15877  |
| H  | 0.21542  | -0.92599 | 5.14670  |
| H  | -1.18256 | -0.27522 | 4.27025  |
| H  | -0.52986 | -1.87805 | 3.83766  |
| C  | 1.00795  | 1.21167  | 3.61473  |
| H  | 0.10092  | 1.82699  | 3.66480  |
| H  | 1.46050  | 1.19387  | 4.61599  |
| H  | 1.71334  | 1.69967  | 2.92804  |
| Mo | 0.88914  | -1.16066 | 0.22566  |
| O  | 0.94759  | -2.88447 | 0.75496  |
| N  | -0.52731 | -3.47950 | 1.65937  |

O -0.78321 -4.54032 1.28902

## 11\_DF

E (M06/BS1) = -3476.311685 au

H (M06/BS1) = -3474.557849 au

G (M06/BS1) = -3474.770081 au

E (M06/BS2//M06/BS2, Solvent = DiethylEther) = -3477.350042 au

O 0.38081 -1.08363 0.02212  
O 0.43516 0.91044 -0.67231  
N -0.49054 -0.05747 -0.39360  
Mo -2.40676 -0.14616 -0.18000  
N -2.85394 -2.05273 -0.60335  
N -3.15995 1.03978 -1.59879  
N -2.90723 0.50748 1.64941  
C -3.91779 -2.51086 0.23682  
C -4.54015 0.80845 -1.89634  
C -3.84294 1.57954 1.71162  
C -5.21718 -2.00650 0.07404  
C -3.70500 -3.44758 1.25816  
C -1.50575 -4.14855 -0.87215  
C -1.43511 -2.36219 -2.57939  
C -3.49040 -3.72296 -2.32283  
C -5.54493 1.58557 -1.31059  
C -4.90848 -0.17587 -2.81923  
C -1.63562 1.25181 -3.54232  
C -1.67055 3.00399 -1.72823  
C -3.51444 2.84285 -3.33597  
C -3.42614 2.90439 1.53016  
C -5.19599 1.33514 1.96986  
C -3.65782 -0.82010 3.65673  
C -2.05027 1.04226 3.91114  
C -1.36969 -1.04912 2.72734  
C -6.26501 -2.38700 0.91079  
H -5.40505 -1.29861 -0.72999  
H -2.70024 -3.82762 1.44025  
C -4.74430 -3.86867 2.08943  
H -2.13372 -4.84752 -0.30716  
H -0.95390 -4.73735 -1.61986  
H -0.77630 -3.68764 -0.19121  
H -1.97082 -1.55807 -3.10188  
H -0.56151 -1.92873 -2.08251  
H -1.07931 -3.08264 -3.32983  
H -3.09709 -4.43325 -3.06409  
H -4.15540 -4.27795 -1.64804  
H -4.09260 -2.97202 -2.85265  
C -6.88800 1.38559 -1.62778  
H -5.26064 2.37707 -0.61633  
C -6.24678 -0.42100 -3.12896  
H -4.12613 -0.78180 -3.27921  
H -0.88636 0.64770 -3.02207  
H -2.25821 0.58797 -4.15995  
H -1.11282 1.94528 -4.21733  
H -1.15424 3.70791 -2.39894  
H -2.33456 3.58303 -1.07009  
H -0.91881 2.49745 -1.11450  
H -4.15367 3.44577 -2.67741  
H -2.95580 3.53273 -3.98365  
H -4.16066 2.22960 -3.97644  
C -4.32827 3.96384 1.59753  
H -2.37316 3.09665 1.31714  
C -6.11132 2.38202 2.09291  
H -5.54169 0.30271 2.05006  
H -3.27165 -1.32228 4.55669  
H -4.45232 -0.13625 3.97937  
H -4.09186 -1.57973 2.99719  
H -2.88305 1.70342 4.18431  
H -1.65016 0.60743 4.83874  
H -1.26572 1.65302 3.45135  
H -1.68663 -1.87877 2.07700  
H -0.50894 -0.56122 2.25280  
H -1.03480 -1.48654 3.67932  
C -6.01790 -3.32920 1.91138  
C -7.63608 -1.80539 0.72137  
C -4.46100 -4.82041 3.21430  
C -7.22506 0.36993 -2.52644  
C -7.95602 2.26549 -1.04678  
C -6.62356 -1.55152 -4.03969  
C -5.66655 3.68927 1.90002  
C -3.87955 5.37129 1.33347

|    |          |          |          |
|----|----------|----------|----------|
| C  | -7.54534 | 2.08492  | 2.42228  |
| H  | -6.83057 | -3.64096 | 2.57170  |
| H  | -8.31332 | -2.51742 | 0.22803  |
| H  | -8.09575 | -1.54475 | 1.68502  |
| H  | -7.60036 | -0.89913 | 0.09979  |
| H  | -3.82164 | -5.65251 | 2.89210  |
| H  | -3.93302 | -4.30977 | 4.03403  |
| H  | -5.38435 | -5.24090 | 3.63093  |
| H  | -8.27731 | 0.19505  | -2.76483 |
| H  | -8.39080 | 2.92000  | -1.81477 |
| H  | -8.78400 | 1.67646  | -0.62709 |
| H  | -7.55419 | 2.90484  | -0.25077 |
| H  | -5.86130 | -1.72467 | -4.81039 |
| H  | -6.72832 | -2.48957 | -3.47293 |
| H  | -7.58211 | -1.36822 | -4.54109 |
| H  | -6.37858 | 4.51480  | 1.97754  |
| H  | -2.79403 | 5.47697  | 1.45346  |
| H  | -4.12420 | 5.67856  | 0.30592  |
| H  | -4.36918 | 6.08678  | 2.00662  |
| H  | -7.91572 | 1.22724  | 1.84255  |
| H  | -7.66711 | 1.82983  | 3.48470  |
| H  | -8.19772 | 2.94228  | 2.21323  |
| Mo | 2.10208  | -0.09522 | -0.05630 |
| N  | 3.03834  | 0.69720  | -1.70271 |
| N  | 3.22680  | -1.77666 | -0.07308 |
| N  | 2.57617  | 0.81789  | 1.63117  |
| C  | 4.02428  | 1.67863  | -1.39592 |
| C  | 4.51731  | -1.80986 | -0.69615 |
| C  | 3.82424  | 0.41334  | 2.22421  |
| C  | 5.38554  | 1.40088  | -1.56770 |
| C  | 3.65440  | 2.95564  | -0.94801 |
| C  | 3.70994  | 0.63775  | -4.10653 |
| C  | 1.78848  | 2.03363  | -3.38942 |
| C  | 1.62788  | -0.45782 | -3.35536 |
| C  | 5.65952  | -1.63430 | 0.09072  |
| C  | 4.68510  | -2.09844 | -2.05290 |
| C  | 2.01745  | -3.78892 | -0.86875 |
| C  | 1.86726  | -3.13662 | 1.55475  |
| C  | 3.93708  | -4.08670 | 0.67582  |
| C  | 3.86958  | -0.62145 | 3.16333  |
| C  | 4.99879  | 1.09448  | 1.90948  |
| C  | 2.81907  | 3.09240  | 2.65356  |
| C  | 1.49809  | 1.33454  | 3.81092  |
| C  | 0.64034  | 2.41473  | 1.73964  |
| C  | 6.35936  | 2.36717  | -1.31006 |
| H  | 5.68214  | 0.41021  | -1.91323 |
| H  | 2.59324  | 3.17667  | -0.81120 |
| C  | 4.60791  | 3.93497  | -0.67280 |
| H  | 4.30976  | -0.26443 | -3.93260 |
| H  | 3.30310  | 0.59154  | -5.12670 |
| H  | 4.37338  | 1.51009  | -4.05254 |
| H  | 0.94409  | 2.14722  | -2.69953 |
| H  | 2.45174  | 2.90231  | -3.28569 |
| H  | 1.40268  | 2.03096  | -4.41950 |
| H  | 1.17498  | -0.38611 | -4.35466 |
| H  | 2.17087  | -1.41030 | -3.30280 |
| H  | 0.81088  | -0.48598 | -2.62899 |
| C  | 6.94065  | -1.75473 | -0.44742 |
| H  | 5.53653  | -1.44719 | 1.15544  |
| C  | 5.95450  | -2.19816 | -2.62385 |
| H  | 3.80932  | -2.24851 | -2.68186 |
| H  | 1.15644  | -3.17248 | -1.15256 |
| H  | 2.67942  | -3.89466 | -1.73878 |
| H  | 1.65258  | -4.79287 | -0.60550 |
| H  | 1.44485  | -4.13917 | 1.71510  |
| H  | 2.46008  | -2.88512 | 2.44434  |
| H  | 1.03373  | -2.43464 | 1.47025  |
| H  | 4.54206  | -3.66056 | 1.48778  |
| H  | 3.52447  | -5.04237 | 1.02763  |
| H  | 4.59760  | -4.29964 | -0.17329 |
| C  | 5.06629  | -0.99241 | 3.77008  |
| H  | 2.94565  | -1.14073 | 3.41711  |
| C  | 6.20912  | 0.75885  | 2.52089  |
| H  | 4.96756  | 1.90613  | 1.18253  |
| H  | 2.26100  | 3.88750  | 3.16634  |
| H  | 3.68750  | 2.84112  | 3.27294  |
| H  | 3.17828  | 3.48780  | 1.69512  |
| H  | 2.38113  | 1.05611  | 4.39808  |
| H  | 0.94855  | 2.09728  | 4.37995  |
| H  | 0.85465  | 0.45069  | 3.71138  |

|   |          |          |          |
|---|----------|----------|----------|
| H | 0.87754  | 2.88033  | 0.77445  |
| H | -0.10509 | 1.63169  | 1.55876  |
| H | 0.17950  | 3.18037  | 2.37984  |
| C | 5.95808  | 3.62356  | -0.85500 |
| C | 7.81066  | 2.06765  | -1.54882 |
| C | 4.20224  | 5.29828  | -0.19186 |
| C | 7.07472  | -2.02576 | -1.80983 |
| C | 8.16013  | -1.63402 | 0.42087  |
| C | 6.11345  | -2.47036 | -4.09153 |
| C | 6.22820  | -0.28213 | 3.44687  |
| C | 5.10947  | -2.14671 | 4.72763  |
| C | 7.46443  | 1.48015  | 2.13264  |
| H | 6.71471  | 4.38384  | -0.64334 |
| H | 8.14397  | 2.45764  | -2.52144 |
| H | 8.45121  | 2.52840  | -0.78440 |
| H | 7.99917  | 0.98553  | -1.55285 |
| H | 3.11110  | 5.39365  | -0.12314 |
| H | 4.62037  | 5.51386  | 0.80174  |
| H | 4.56546  | 6.08544  | -0.86648 |
| H | 8.07348  | -2.12039 | -2.24442 |
| H | 8.73754  | -2.56921 | 0.42703  |
| H | 8.84016  | -0.84814 | 0.06044  |
| H | 7.89262  | -1.39991 | 1.45931  |
| H | 5.18689  | -2.86025 | -4.53176 |
| H | 6.37584  | -1.55447 | -4.64166 |
| H | 6.91324  | -3.19752 | -4.28320 |
| H | 7.17132  | -0.55313 | 3.92815  |
| H | 4.13484  | -2.31158 | 5.20393  |
| H | 5.37863  | -3.07913 | 4.21004  |
| H | 5.85494  | -1.99199 | 5.51788  |
| H | 7.80523  | 1.14842  | 1.13957  |
| H | 7.30626  | 2.56517  | 2.06741  |
| H | 8.27880  | 1.29004  | 2.84296  |
| C | -2.51276 | -0.07061 | 2.96949  |
| C | -2.49815 | 2.01359  | -2.54356 |
| C | 2.54839  | 0.73219  | -3.11167 |
| C | 2.76337  | -3.16858 | 0.31433  |
| C | -2.33252 | -3.06390 | -1.57049 |
| C | 1.88551  | 1.89624  | 2.44212  |

## 2. Potential energy surfaces for selected structures using B3LYP.

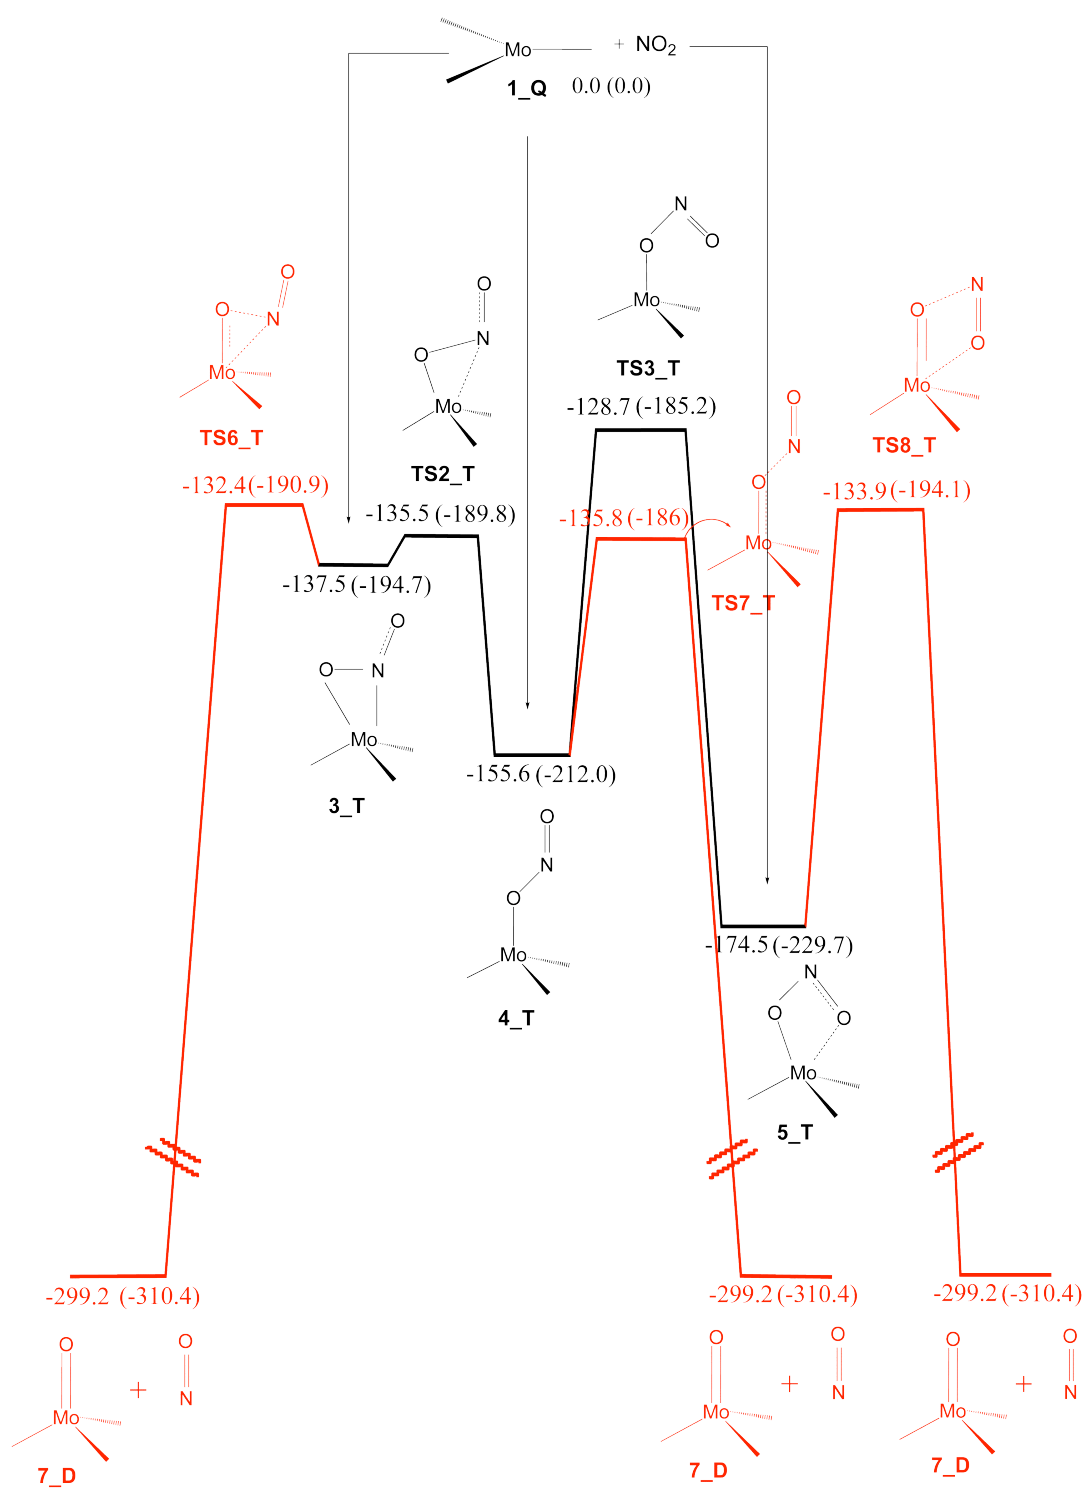

Figure S1: Relative Gibbs free energies for the model ligand, triplet pathways from the B3LYP/BS2(solvent=Et<sub>2</sub>O)//B3LYP/BS2 level of theory (kJ mol<sup>-1</sup>, uncorrected energies in parentheses).

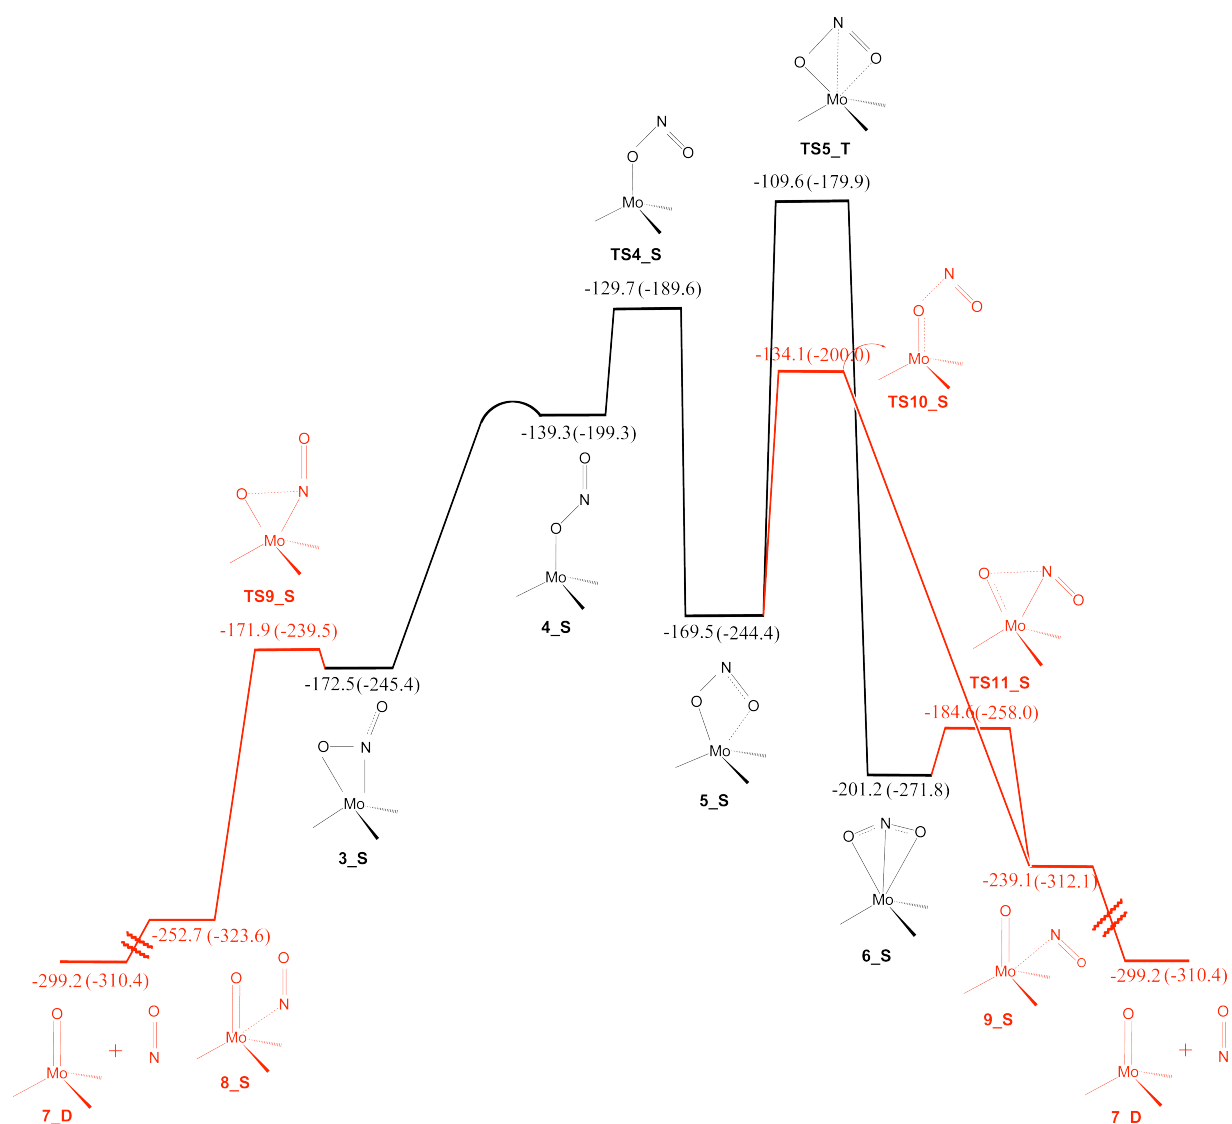

Figure S2: Relative Gibbs free energies for the model ligand, singlet pathways from the B3LYP/BS2(solvent=Et<sub>2</sub>O)//B3LYP/BS2 level of theory (kJ mol<sup>-1</sup>, uncorrected energies in parentheses).

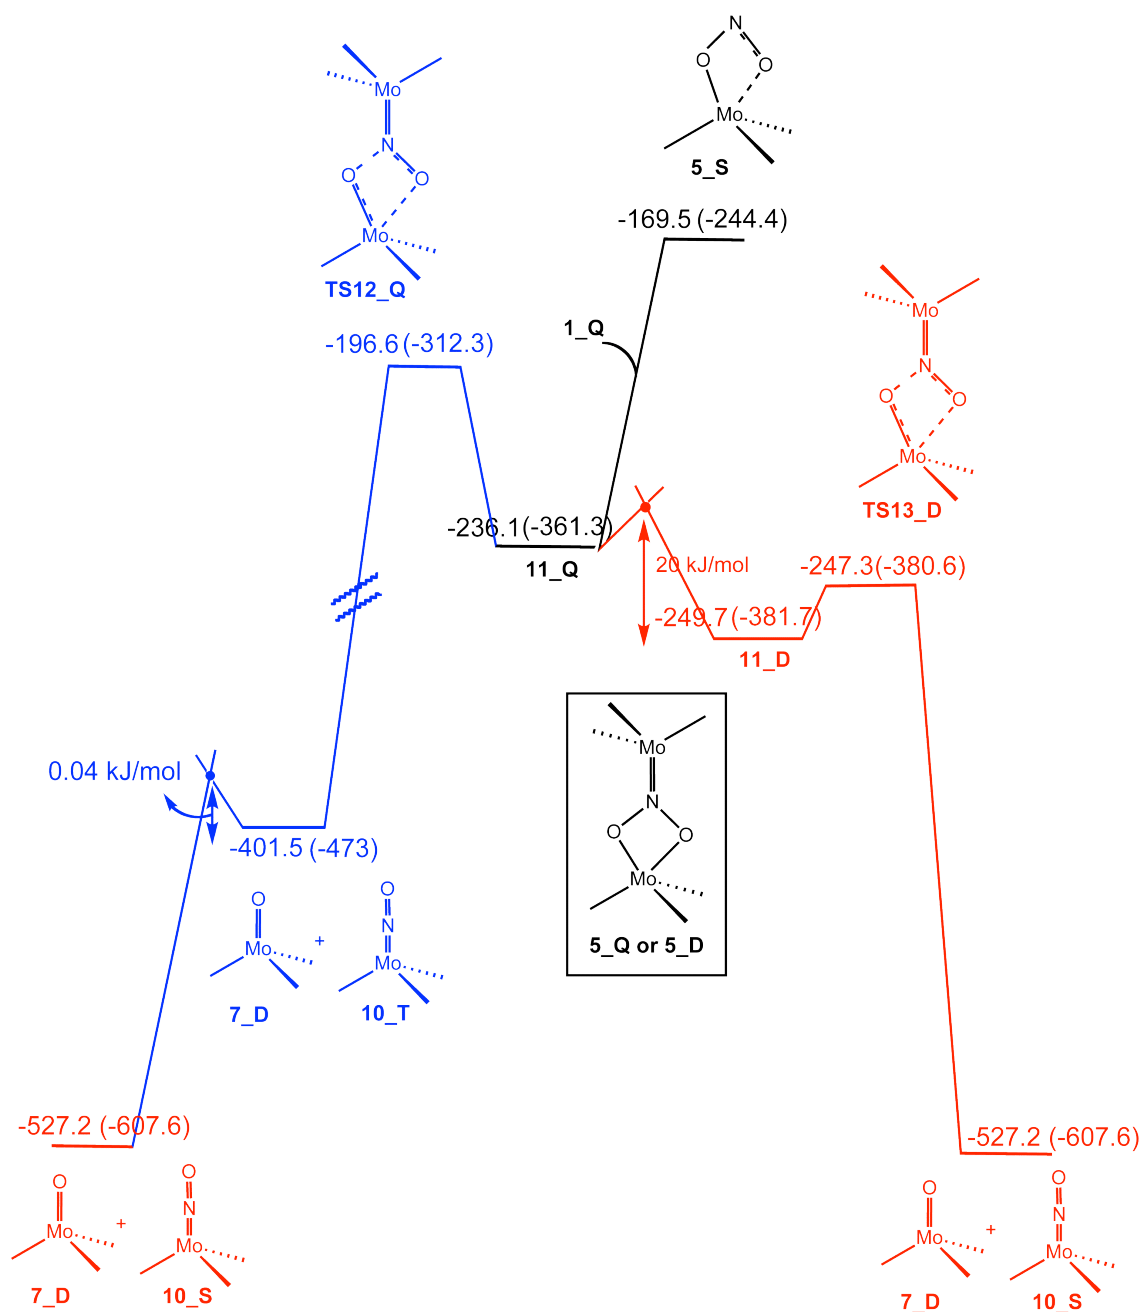

Figure S3: Relative Gibbs free energies for the model ligand, binuclear pathways from the B3LYP/BS2(solvent=Et<sub>2</sub>O)//B3LYP/BS2 level of theory (kJ mol<sup>-1</sup>, uncorrected energies in parentheses).



### 3. B3LYP optimized geometries and total energies for selected species shown in Section 3.

#### 1\_Q

E (B3LYP/BS2) = -236.209561 au  
H (B3LYP/BS2) = -236.127559 au  
G(B3LYP/BS2) = -236.169813 au  
E(B3LYP/BS2//B3LYP/BS2, Solvent = DiethylEther) = -236.221116 au

|    |             |             |             |
|----|-------------|-------------|-------------|
| N  | 1.81597500  | 0.76272100  | 0.00022300  |
| N  | -0.24702200 | -1.95392500 | -0.00030900 |
| N  | -1.56882700 | 1.19082200  | 0.00000300  |
| H  | -2.03472400 | 1.54451300  | 0.82775500  |
| H  | -2.03461300 | 1.54462500  | -0.82776400 |
| H  | 2.35507800  | 0.98975000  | -0.82749000 |
| H  | 2.35499200  | 0.98944500  | 0.82808000  |
| H  | -0.32103600 | -2.53401700 | -0.82815200 |
| H  | -0.32117500 | -2.53421800 | 0.82738600  |
| Mo | 0.00001400  | 0.00006100  | 0.00001800  |

#### 3\_T

E (B3LYP/BS2) = -441.442137 au  
H (B3LYP/BS2) = -441.346504 au  
G(B3LYP/BS2) = -441.395280 au  
E(B3LYP/BS2//B3LYP/BS2, Solvent = DiethylEther) = -441.442137 au

|    |             |             |             |
|----|-------------|-------------|-------------|
| Mo | -0.32973300 | 0.00009800  | -0.02842800 |
| N  | 1.81298500  | 0.00078700  | -0.03050200 |
| O  | 2.99310800  | -0.00000800 | -0.19210200 |
| O  | 1.30736700  | 0.00111200  | 1.22488500  |
| N  | -0.80688200 | 1.63433400  | -0.95028900 |
| N  | -0.80395000 | -1.63522200 | -0.94987600 |
| N  | -1.90560600 | -0.00093300 | 1.18714800  |
| H  | -0.32665500 | 2.01048900  | -1.75928900 |
| H  | -1.64615700 | 2.16029000  | -0.73929700 |
| H  | -0.32267200 | -2.01096300 | -1.75844300 |
| H  | -1.64271000 | -2.16219100 | -0.73936800 |
| H  | -1.80477100 | -0.00129100 | 2.19577000  |
| H  | -2.88789400 | -0.00203200 | 0.93696000  |

#### TS2\_T

E (B3LYP/BS2) = -441.429063 au  
H (B3LYP/BS2) = -441.333307 au  
G(B3LYP/BS2) = -441.383306 au  
E(B3LYP/BS2//B3LYP/BS2, Solvent = DiethylEther) = -441.440256 au

|    |             |             |             |
|----|-------------|-------------|-------------|
| Mo | -0.45568800 | 0.05226300  | 0.02663400  |
| N  | 2.06937600  | 0.11744500  | 0.24256700  |
| O  | 3.25046700  | -0.01496000 | 0.19556600  |
| O  | 1.34554900  | -0.79665900 | -0.43560200 |
| N  | -1.33349000 | -0.01132000 | 1.76406600  |
| N  | -0.69051400 | 1.73140200  | -0.91708100 |
| N  | -1.42414900 | -1.37171900 | -0.91213900 |
| H  | -1.11162500 | 0.56976600  | 2.56476000  |
| H  | -1.97428100 | -0.75068400 | 2.02703700  |
| H  | -0.02833300 | 2.49867300  | -0.86291700 |
| H  | -1.50878100 | 1.99947200  | -1.44988600 |
| H  | -0.93484700 | -1.91662900 | -1.61550300 |
| H  | -2.41990800 | -1.36335300 | -1.10371200 |

#### 4\_T

E (B3LYP/BS2) = -441.448717 au  
H (B3LYP/BS2) = -441.352098 au  
G(B3LYP/BS2) = -441.402171 au  
E(B3LYP/BS2//B3LYP/BS2, Solvent = DiethylEther) = -441.448717 au

|    |             |             |             |
|----|-------------|-------------|-------------|
| Mo | 0.61685600  | -0.00911600 | 0.01518400  |
| O  | -1.28099200 | 0.47257700  | -0.42154100 |
| N  | -2.36208500 | -0.29090100 | -0.03146400 |
| O  | -3.39319400 | 0.12793400  | -0.43960600 |
| N  | 0.09173200  | -1.44883900 | 1.20033500  |
| N  | 2.02746800  | -0.60868100 | -1.19818800 |
| N  | 0.97728400  | 1.79039100  | 0.65306500  |
| H  | -0.89817600 | -1.63845500 | 1.33753000  |
| H  | 0.64957500  | -1.84054100 | 1.95094000  |
| H  | 2.13087100  | -1.57445600 | -1.49178300 |
| H  | 2.49809100  | -0.00113900 | -1.86093100 |
| H  | 0.23115000  | 2.47890300  | 0.67739400  |
| H  | 1.73324200  | 2.06067100  | 1.27206300  |

### TS3\_T

E (B3LYP/BS2) = -441.426432 au  
H (B3LYP/BS2) = -441.330394 au  
G(B3LYP/BS2) = -441.379811 au  
E(B3LYP/BS2//B3LYP/BS2, Solvent = DiethylEther) = -441.438529 au

|    |             |             |             |
|----|-------------|-------------|-------------|
| Mo | -0.55715700 | -0.02242300 | 0.01395100  |
| N  | 2.51154300  | 0.17735000  | 0.19229700  |
| O  | 1.28093500  | 0.76340400  | -0.04959000 |
| O  | 2.99961200  | -0.32419200 | -0.76203100 |
| N  | -1.32190200 | 1.76808300  | 0.07179300  |
| N  | -1.60974000 | -1.10153100 | -1.21930600 |
| N  | -0.17813400 | -1.10400600 | 1.58681900  |
| H  | -0.70420900 | 2.57285800  | 0.11874200  |
| H  | -2.23447100 | 2.00076300  | 0.44731600  |
| H  | -1.50704300 | -2.10645100 | -1.31733000 |
| H  | -2.06107000 | -0.72327700 | -2.04600800 |
| H  | 0.72721800  | -1.05011000 | 2.04466600  |
| H  | -0.87656200 | -1.44496200 | 2.23841600  |

### 5\_T

E (B3LYP/BS2) = -441.455451 au  
H (B3LYP/BS2) = -441.359106 au  
G(B3LYP/BS2) = -441.409375 au  
E(B3LYP/BS2//B3LYP/BS2, Solvent = DiethylEther) = -441.455451 au

|    |             |             |             |
|----|-------------|-------------|-------------|
| Mo | -0.28208600 | -0.02105800 | 0.01898400  |
| N  | 2.28229800  | 0.40811000  | -0.22902100 |
| O  | 1.30402500  | 1.27909800  | -0.23097800 |
| O  | 1.79945600  | -0.74854900 | -0.08083700 |
| N  | -1.75490900 | 1.27387700  | -0.12105200 |
| N  | -0.91648700 | -1.23762400 | -1.35694900 |
| N  | -0.40016400 | -0.68455100 | 1.83646700  |
| H  | -1.59458400 | 2.27465100  | -0.07135500 |
| H  | -2.74774900 | 1.08652400  | -0.21192400 |
| H  | -0.45442300 | -2.10076200 | -1.61827700 |
| H  | -1.69527500 | -1.03654600 | -1.97220200 |
| H  | 0.26213900  | -1.32885800 | 2.25241600  |
| H  | -1.22552700 | -0.57365900 | 2.41240800  |

### 3TS\_T

E (B3LYP/BS2) = -441.431469 au  
H (B3LYP/BS2) = -441.336490 au  
G(B3LYP/BS2) = -441.383497 au  
E(B3LYP/BS2//B3LYP/BS2, Solvent = DiethylEther) = -441.441887 au

|    |             |             |             |
|----|-------------|-------------|-------------|
| Mo | 0.24687800  | 0.00636700  | 0.03378600  |
| N  | -2.29085000 | -0.11683700 | 0.47770200  |
| O  | -0.93258200 | -0.31125200 | 1.39747400  |
| O  | -1.82903300 | 0.02095200  | -0.68859900 |
| N  | 2.02100600  | 0.04719400  | 0.79279200  |
| N  | 0.64504100  | -1.51897100 | -1.10570400 |
| N  | 0.28577200  | 1.79049100  | -0.74975800 |
| H  | 2.29161600  | 0.60830100  | 1.59514700  |
| H  | 2.83648400  | -0.39807900 | 0.38351900  |
| H  | -0.00980600 | -1.83895000 | -1.80956400 |
| H  | 1.38874800  | -2.19186300 | -0.96281900 |
| H  | -0.53746300 | 2.17222500  | -1.19856400 |
| H  | 1.12767800  | 2.29020300  | -1.00294900 |

### 7\_D

E (B3LYP/BS2) = -311.541013 au  
H (B3LYP/BS2) = -311.453521 au  
G(B3LYP/BS2) = -311.496121 au  
E(B3LYP/BS2//B3LYP/BS2, Solvent = DiethylEther) = -311.551569 au

|    |             |             |             |
|----|-------------|-------------|-------------|
| Mo | 0.06398300  | -0.05056500 | 0.08438800  |
| O  | 0.27426300  | -0.54912800 | 1.68830200  |
| N  | -0.93353900 | 1.63307900  | -0.04948700 |
| N  | 1.73861300  | 0.14821800  | -0.90955200 |
| N  | -1.29193100 | -1.09759900 | -0.86366900 |
| H  | -1.94777600 | 1.65507300  | -0.01732900 |
| H  | -0.56338000 | 2.50530700  | 0.31157100  |
| H  | 2.62681500  | -0.18509500 | -0.55535900 |
| H  | 1.85134900  | 0.55710500  | -1.82934100 |
| H  | -1.40097800 | -2.10040100 | -0.77946100 |
| H  | -2.03942100 | -0.70111700 | -1.42186400 |

### NO

E (B3LYP/BS2) = -129.934267 au

H (B3LYP/BS2) = -129.926508 au  
G(B3LYP/BS2) = -129.949800 au  
E(B3LYP/BS2//B3LYP/BS2, Solvent = DiethylEther) = -129.934639 au  
N 0.00000000 0.00000000 -0.61196800  
O 0.00000000 0.00000000 0.53547200

### TS7\_T

E (B3LYP/BS2) = -441.428283 au  
H (B3LYP/BS2) = -441.333498 au  
G(B3LYP/BS2) = -441.384073 au  
E(B3LYP/BS2//B3LYP/BS2, Solvent = DiethylEther) = -441.438824 au  
Mo -0.58959900 0.00223800 0.00830800  
N 2.50609700 -0.24533900 0.08772400  
O 1.15366400 0.53690300 -0.34909900  
O 3.43279400 0.24259000 -0.41127700  
N -1.49300300 1.69513800 0.34449900  
N -1.57595700 -1.02077800 -1.34013800  
N -0.16764300 -1.17243000 1.50310000  
H -0.96698000 2.54939900 0.49408700  
H -2.44132200 1.79869200 0.68817700  
H -1.50217700 -2.03114900 -1.39590900  
H -1.84202800 -0.65059600 -2.24710300  
H 0.76859900 -1.18317700 1.89622900  
H -0.83106300 -1.60922300 2.13230900

### TS6\_T

E (B3LYP/BS2) = -441.430362 au  
H (B3LYP/BS2) = -441.335053 au  
G(B3LYP/BS2) = -441.382962 au  
E(B3LYP/BS2//B3LYP/BS2, Solvent = DiethylEther) = -441.440709 au  
Mo 0.31822900 -0.05740600 -0.02911700  
O -1.03572100 -0.45742100 1.27835900  
N -1.73562000 -0.30893000 -0.09267300  
O -2.81799000 0.18234600 -0.10458200  
N 1.72937900 0.63094400 1.13215500  
N 1.18383000 -1.57562800 -0.87500000  
N 0.26767200 1.59938400 -1.05867400  
H 1.74084600 0.41304300 2.12435700  
H 2.26980600 1.47329000 0.96158900  
H 0.77490800 -2.11599300 -1.62808900  
H 2.16029700 -1.80448200 -0.74193300  
H -0.47300100 1.82794200 -1.71053200  
H 0.87436600 2.39745400 -0.91334300

### 3\_S

E (B3LYP/BS2) = -441.450788 au  
H (B3LYP/BS2) = -441.352262 au  
G(B3LYP/BS2) = -441.397935 au  
E(B3LYP/BS2//B3LYP/BS2, Solvent = DiethylEther) = -441.4614508 au  
Mo 0.31539900 -0.04715200 0.00002600  
N -1.62967800 0.01300000 0.00002600  
O -2.79103900 -0.25819100 0.00025900  
O -1.19220400 1.30325300 -0.00103700  
N 0.77570500 -1.00896000 1.60401700  
N 0.77550000 -1.01182500 -1.60229900  
N 1.66355000 1.33861100 -0.00119200  
H 0.17686600 -1.68220900 2.07005000  
H 1.72207900 -1.06281700 1.96877900  
H 0.17652200 -1.68587100 -2.06700000  
H 1.72180100 -1.06642700 -1.96713600  
H 1.86324600 1.89991400 -0.82691500  
H 1.86313400 1.90151500 0.82346800

### 4\_S

E (B3LYP/BS2) = -441.433263 au  
H (B3LYP/BS2) = -441.335746 au  
G(B3LYP/BS2) = -441.385313 au  
E(B3LYP/BS2//B3LYP/BS2, Solvent = DiethylEther) = -441.443905 au  
Mo 0.49915400 0.05445500 -0.00325400  
O -1.34384200 0.55344400 0.32039100  
N -2.38964600 -0.34328500 -0.09237400  
O -3.44613700 0.15821600 -0.01402300  
N 0.86361800 -1.24582000 -1.38252700  
N 1.59656400 1.62962200 -0.23602500  
N 1.17340600 -0.95369900 1.47551000  
H 0.55401100 -1.19209200 -2.34850100

|   |            |             |             |
|---|------------|-------------|-------------|
| H | 1.60538400 | -1.94012900 | -1.30589000 |
| H | 1.29346200 | 2.41602200  | -0.80567400 |
| H | 2.60181500 | 1.67518500  | -0.10074400 |
| H | 1.42121800 | -0.57481700 | 2.38557800  |
| H | 1.17190000 | -1.97227000 | 1.50885800  |

### TS4\_S

E (B3LYP/BS2) = -441.430273 au  
H (B3LYP/BS2) = -441.334010 au  
G(B3LYP/BS2) = -441.382386 au  
E(B3LYP/BS2//B3LYP/BS2, Solvent = DiethylEther) = -441.4401778 au

|    |             |             |             |
|----|-------------|-------------|-------------|
| Mo | -0.46579100 | -0.07840900 | 0.00829500  |
| N  | 2.60097800  | -0.48204600 | -0.36759500 |
| O  | 1.22733200  | -0.91167600 | -0.33902300 |
| O  | 2.85175400  | 0.36827800  | 0.39934000  |
| N  | -1.88845200 | -1.28594100 | 0.53283400  |
| N  | -0.41685300 | 1.47144300  | 1.13955300  |
| N  | -1.04292500 | 0.93562300  | -1.50961500 |
| H  | -1.68714200 | -2.17920600 | 0.97077900  |
| H  | -2.87590700 | -1.06859400 | 0.61027500  |
| H  | -0.77455100 | 2.38337100  | 0.85325200  |
| H  | -0.14493100 | 1.50752300  | 2.11741400  |
| H  | -1.32589900 | 0.56827400  | -2.41314100 |
| H  | -1.03027100 | 1.95541800  | -1.53576300 |

### 4\_S

E (B3LYP/BS2) = -441.451668 au  
H (B3LYP/BS2) = -441.353077 au  
G(B3LYP/BS2) = -441.398026 au  
E(B3LYP/BS2//B3LYP/BS2, Solvent = DiethylEther) = -441.461084 au

|    |             |             |             |
|----|-------------|-------------|-------------|
| Mo | 0.31044100  | -0.01359900 | -0.00003100 |
| N  | -2.25806200 | 0.44984100  | -0.00016100 |
| O  | -1.26339000 | 1.30457400  | -0.00041400 |
| O  | -1.74072000 | -0.69986600 | 0.00031300  |
| N  | 1.66988200  | 1.34735200  | -0.00056700 |
| N  | 0.59663600  | -1.04924200 | 1.60292700  |
| N  | 0.59647700  | -1.05076100 | -1.60204300 |
| H  | 1.95400300  | 1.86681400  | -0.82940300 |
| H  | 1.95387900  | 1.86753000  | 0.82786200  |
| H  | -0.09626300 | -1.66811900 | 2.01158000  |
| H  | 1.52244500  | -1.27056800 | 1.95962500  |
| H  | -0.09649600 | -1.66996700 | -2.01007100 |
| H  | 1.52224600  | -1.27250900 | -1.95857900 |

### TS5\_S

E (B3LYP/BS2) = -441.428091 au  
H (B3LYP/BS2) = -441.331368 au  
G(B3LYP/BS2) = -441.376240 au  
E(B3LYP/BS2//B3LYP/BS2, Solvent = DiethylEther) = -441.436486 au

|    |             |             |             |
|----|-------------|-------------|-------------|
| Mo | -0.24969300 | -0.03397700 | -0.01106800 |
| N  | 2.12956600  | -0.18263100 | 0.37705300  |
| O  | 1.78988900  | 0.59263600  | -0.56549600 |
| O  | 1.22108300  | -0.15594200 | 1.36664400  |
| N  | -1.85997900 | -0.32356600 | 1.02315700  |
| N  | -0.88570100 | 1.67145300  | -0.62568200 |
| N  | -0.28792100 | -1.44975500 | -1.31742100 |
| H  | -1.83474100 | -0.63720300 | 1.98935300  |
| H  | -2.82200600 | -0.13673700 | 0.74786800  |
| H  | -0.46267100 | 2.17172700  | -1.39920800 |
| H  | -1.50349300 | 2.27155400  | -0.08856500 |
| H  | -0.59531700 | -2.39100900 | -1.09651300 |
| H  | -0.05418400 | -1.35333800 | -2.29702400 |

### 6\_S

E (B3LYP/BS2) = -441.4608994 au  
H (B3LYP/BS2) = -441.363444 au  
G(B3LYP/BS2) = -441.408942 au  
E(B3LYP/BS2//B3LYP/BS2, Solvent = DiethylEther) = -441.4714846 au

|    |             |             |             |
|----|-------------|-------------|-------------|
| Mo | -0.14769900 | -0.00020600 | 0.05537800  |
| N  | 1.83344600  | -0.00393300 | 0.10198300  |
| O  | 1.34359700  | -1.10339200 | -0.60225700 |
| O  | 1.35025100  | 1.09982600  | -0.59654100 |
| N  | -1.34663900 | 1.38948700  | -0.59765500 |
| N  | -1.35578900 | -1.38192900 | -0.59774400 |
| N  | -0.32132600 | -0.00038800 | 1.96862000  |
| H  | -1.05386000 | 2.35293700  | -0.71058800 |
| H  | -2.10014500 | 1.17926100  | -1.24382400 |

|   |             |             |             |
|---|-------------|-------------|-------------|
| H | -1.07022400 | -2.34775700 | -0.70894900 |
| H | -2.10792000 | -1.16753300 | -1.24412100 |
| H | 0.50450700  | -0.00556300 | 2.55488000  |
| H | -1.18760900 | 0.00317600  | 2.49068000  |

#### 4TS\_S

E (B3LYP/BS2) = -441.432852 au  
H (B3LYP/BS2) = -441.336364 au  
G(B3LYP/BS2) = -441.382654 au  
E(B3LYP/BS2//B3LYP/BS2, Solvent =DiethylEther) = -441.444152 au

|    |             |             |             |
|----|-------------|-------------|-------------|
| Mo | 0.45968000  | -0.03656400 | -0.00351500 |
| N  | -2.24526300 | 0.39368500  | -0.13871900 |
| O  | -1.26172700 | -0.55425000 | -0.67225500 |
| O  | -3.25232400 | -0.13686000 | 0.15014000  |
| N  | 1.37989600  | -1.66140800 | 0.48512400  |
| N  | 1.46516800  | 0.83956200  | -1.37756300 |
| N  | 0.62807200  | 1.26935900  | 1.41308500  |
| H  | 2.38794600  | -1.78244900 | 0.48418300  |
| H  | 0.94954400  | -2.38113500 | 1.06145400  |
| H  | 1.90538000  | 0.37065900  | -2.16422400 |
| H  | 1.44211900  | 1.84524000  | -1.53572100 |
| H  | 1.47461100  | 1.81592300  | 1.55823900  |
| H  | 0.05112500  | 1.30792000  | 2.24714900  |

#### 7\_S

E (B3LYP/BS2) = -441.479946 au  
H (B3LYP/BS2) = -441.381758 au  
G(B3LYP/BS2) = -441.427069 au  
E(B3LYP/BS2//B3LYP/BS2, Solvent =DiethylEther) = -441.486834 au

|    |             |             |             |
|----|-------------|-------------|-------------|
| Mo | -0.13602000 | -0.04522500 | 0.10990600  |
| N  | 1.82159000  | 0.72798800  | -0.02766000 |
| O  | 0.15001300  | -0.33849000 | 1.75326500  |
| O  | 2.05940000  | -0.40489700 | -0.28147300 |
| N  | -0.27486300 | -1.63270900 | -1.05878700 |
| N  | -2.09289100 | 0.13088300  | 0.03668500  |
| N  | -0.22661100 | 1.78442600  | -0.73509500 |
| H  | 0.43689700  | -2.34699500 | -1.13310500 |
| H  | -1.15376600 | -1.93214200 | -1.45778100 |
| H  | -2.57000700 | 1.01924000  | 0.10625700  |
| H  | -2.67138700 | -0.61273800 | 0.41192300  |
| H  | 0.44058200  | 2.52763500  | -0.57827100 |
| H  | -1.03535000 | 2.11741200  | -1.24538800 |

#### TS10\_S

E (B3LYP/BS2) = -441.455955 au  
H (B3LYP/BS2) = -441.359404 au  
G(B3LYP/BS2) = -441.402905 au  
E(B3LYP/BS2//B3LYP/BS2, Solvent =DiethylEther) = -441.466257 au

|    |             |             |             |
|----|-------------|-------------|-------------|
| Mo | 0.17374900  | -0.03408100 | 0.01072400  |
| N  | -1.77550600 | -0.38887800 | 0.28900200  |
| O  | -0.84088400 | -0.00282700 | 1.57527300  |
| O  | -1.82193200 | 0.67242600  | -0.39191300 |
| N  | 0.71710700  | 1.63870900  | -0.81607000 |
| N  | 1.93841400  | -0.27334600 | 0.78148000  |
| N  | 0.14933400  | -1.52353900 | -1.22879900 |
| H  | 0.08157800  | 2.27188000  | -1.28108900 |
| H  | 1.64750200  | 2.03005000  | -0.73163500 |
| H  | 2.20470600  | -1.03449000 | 1.39678800  |
| H  | 2.65136000  | 0.44847200  | 0.79811600  |
| H  | -0.68921000 | -2.05901800 | -1.41423800 |
| H  | 0.90372000  | -1.75290400 | -1.86451700 |

#### TS9\_S

E (B3LYP/BS2) = -441.449481 au  
H (B3LYP/BS2) = -441.352205 au  
G(B3LYP/BS2) = -441.398643 au  
E(B3LYP/BS2//B3LYP/BS2, Solvent =DiethylEther) = -441.459191 au

|    |             |             |             |
|----|-------------|-------------|-------------|
| Mo | 0.29722800  | -0.00764100 | 0.01675600  |
| O  | -1.05366000 | 0.28928100  | -1.34831500 |
| N  | -1.65293100 | 0.02349600  | 0.02581000  |
| O  | -2.82944600 | -0.01372400 | 0.14226800  |
| N  | 0.61361700  | -1.78593300 | 0.72754700  |
| N  | 1.88215600  | 0.16326600  | -1.09233300 |
| N  | 0.71555500  | 1.40684100  | 1.27703700  |
| H  | -0.09612900 | -2.34961400 | 1.17940700  |
| H  | 1.53403800  | -2.19136900 | 0.85865800  |
| H  | 2.22990900  | -0.56603800 | -1.70990700 |

|   |            |            |             |
|---|------------|------------|-------------|
| H | 2.29113300 | 1.05237900 | -1.36974700 |
| H | 1.65806500 | 1.72229900 | 1.48018100  |
| H | 0.05547300 | 1.79513300 | 1.93963100  |

## 8\_S

E (B3LYP/BS2) = -441.483564 au

H (B3LYP/BS2) = -441.385444 au

G(B3LYP/BS2) = -441.431469 au

E(B3LYP/BS2//B3LYP/BS2, Solvent =DiethylEther) = -441.491233 au

|    |             |             |             |
|----|-------------|-------------|-------------|
| Mo | -0.31925300 | -0.09418600 | 0.10874400  |
| O  | -0.32492700 | -0.28489200 | 1.79204400  |
| N  | 1.79910300  | -0.33857900 | 0.14308900  |
| O  | 2.69450700  | 0.34578100  | -0.15303700 |
| N  | -0.22755000 | -1.71367100 | -1.02334500 |
| N  | -2.06695200 | 0.63920800  | -0.38079800 |
| N  | 0.32258300  | 1.63647100  | -0.58512800 |
| H  | 0.27309500  | -2.55498000 | -0.76636800 |
| H  | -0.54008100 | -1.75325100 | -1.98619700 |
| H  | -2.88011700 | 0.39435000  | 0.17491400  |
| H  | -2.24835700 | 1.47597500  | -0.92043100 |
| H  | -0.25279700 | 2.46551000  | -0.64858000 |
| H  | 1.30993400  | 1.87707600  | -0.60937200 |

## 4. Comparison between solvated and gas-phase optimised geometries for selected structures.

M06/BS1 level of theory:

Energy differences between gas-phase and solvated structures for selected complexes:

|              | Gas-phase         |                 | Solvent           |                 |                            |
|--------------|-------------------|-----------------|-------------------|-----------------|----------------------------|
|              | Energy (Hartrees) | Energy (kJ/mol) | Energy (Hartrees) | Energy (kJ/mol) | E(solvent)-E(gas) (kJ/mol) |
| <b>1_Q</b>   | -235.920207597    | -619408.505046  | -235.932271841    | -619440.179719  | -31.7                      |
| <b>4_T</b>   | -440.983754620    | -1157802.84775  | -440.998100351    | -1157840.51247  | -37.7                      |
| <b>4_S</b>   | -440.983310266    | -1157801.6811   | -440.995986637    | -1157834.96292  | -33.3                      |
| <b>7_D</b>   | -311.186801779    | -817020.948071  | -311.198331547    | -817051.219477  | -30.3                      |
| <b>TS7_T</b> | -440.965108782    | -1157753.89311  | -440.977304445    | -1157785.91282  | -32.0                      |

**1\_Q**  
(D<sub>3h</sub>)

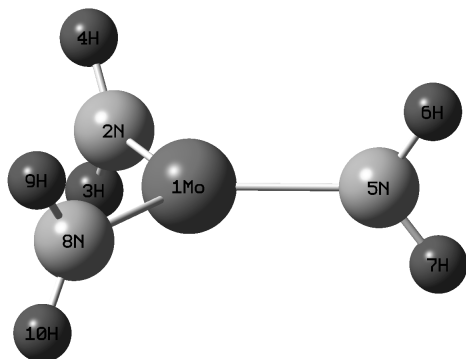

| Bond lengths | gas   | solvent |
|--------------|-------|---------|
| 1Mo-5N       | 1.972 | 1.978   |
| 1Mo-2N       | 1.971 | 1.980   |
| 1Mo-8N       | 1.971 | 1.981   |

## 4\_S

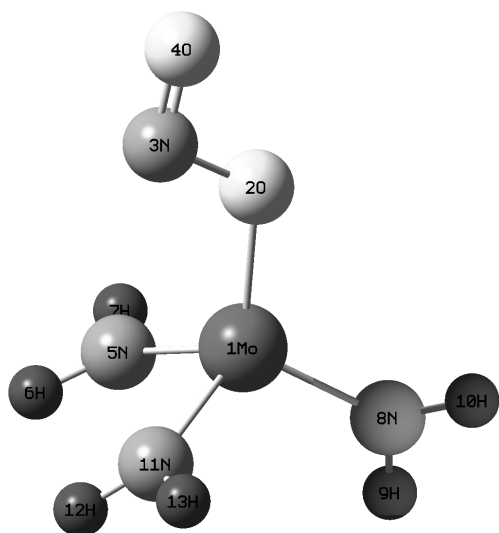

**Gas-phase optimised geometry**

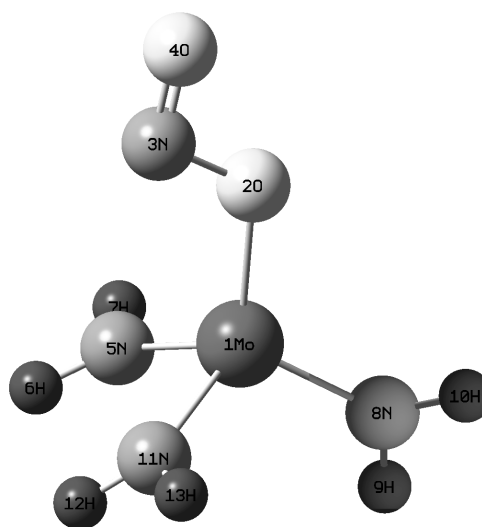

**Solvent optimised geometry**

| Bond lengths    | gas    | solvent |
|-----------------|--------|---------|
| 1Mo-5N          | 1.910  | 1.897   |
| 1Mo-11N         | 1.923  | 1.932   |
| 1Mo-8N          | 1.941  | 1.951   |
| 1Mo-2O          | 1.958  | 1.990   |
| 2O-3N           | 1.393  | 1.361   |
| 3N-4O           | 1.179  | 1.191   |
| Bond angles     |        |         |
| 1Mo-2O-3N       | 118.77 | 123.01  |
| 2O-3N-4O        | 111.69 | 112.17  |
| Dihedral angles |        |         |
| 2O-1Mo-5N-7H    | 70.56  | 75.34   |
| 2O-1Mo-2N-12H   | 123.59 | 122.83  |
| 2O-1Mo-8N-10H   | 32.26  | 53.01   |



#### 4\_T

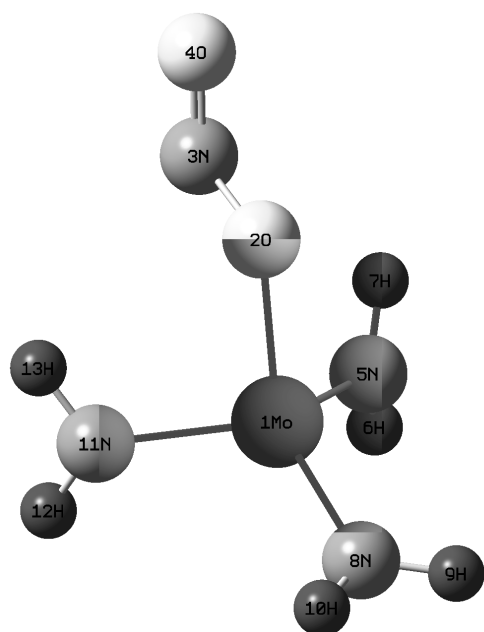

**Gas-phase optimised geometry**

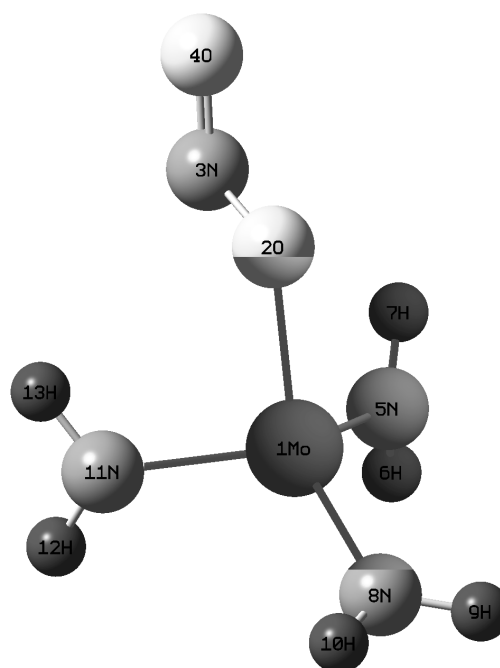

**Solvent optimised geometry**

| Bond lengths    | gas    | solvent |
|-----------------|--------|---------|
| 1Mo-5N          | 1.938  | 1.939   |
| 1Mo-11N         | 1.938  | 1.939   |
| 1Mo-8N          | 1.951  | 1.951   |
| 1Mo-2O          | 2.026  | 2.067   |
| 2O-3N           | 1.357  | 1.336   |
| 3N-4O           | 1.191  | 1.200   |
| Bond angles     |        |         |
| 1Mo-2O-3N       | 119.58 | 119.21  |
| 2O-3N-4O        | 112.64 | 113.00  |
| Dihedral angles |        |         |
| 2O-1Mo-5N-7H    | -4.73  | -4.22   |
| 2O-1Mo-2N-12H   | 157.62 | 155.68  |
| 2O-1Mo-8N-10H   | 79.07  | 79.07   |

## TS7\_T

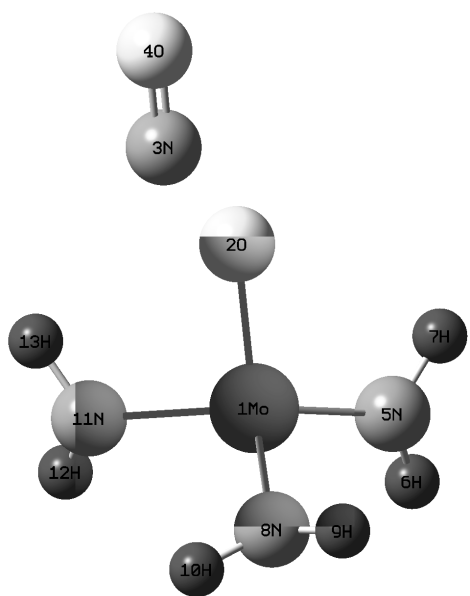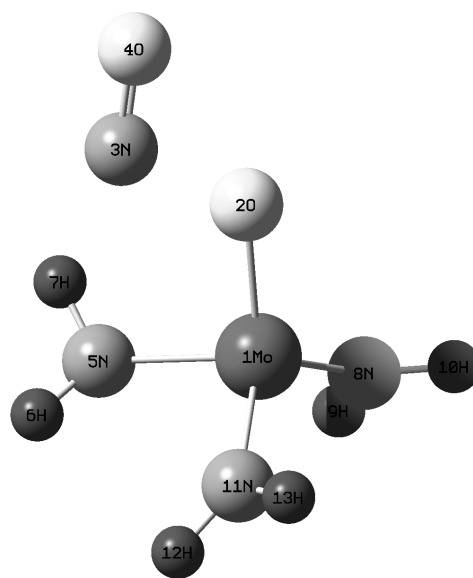

**Gas-phase optimised geometry**

**Solvent optimised geometry**

| Bond lengths    | gas    | solvent |
|-----------------|--------|---------|
| 1Mo-5N          | 1.947  | 1.948   |
| 1Mo-11N         | 1.946  | 1.958   |
| 1Mo-8N          | 1.961  | 1.953   |
| 1Mo-2O          | 1.830  | 1.851   |
| 2O-3N           | 1.725  | 1.625   |
| 3N-4O           | 1.161  | 1.174   |
| Bond angles     |        |         |
| 1Mo-2O-3N       | 121.37 | 122.39  |
| 2O-3N-4O        | 109.34 | 109.58  |
| Dihedral angles |        |         |
| 2O-1Mo-5N-7H    | 4.86   | 25.82   |
| 2O-1Mo-2N-12H   | 143.54 | 124.15  |
| 2O-1Mo-8N-10H   | 89.39  | 69.99   |
